# Supplementary material for: Pd-Catalyzed [4 + 2] cycloaddition of methylene cyclic carbamates with dihydropyrazolone-derived alkenes: synthesis of spiropyrazolones
Source: Royal Society of Chemistry journal article supplement (doi:10.1039/d2ob00535b), 2022-01-01
Supplement: d2ob00535b1.pdf [file d2ob00535b1.pdf]

## Electronic Supplementary Information

# **Pd-catalyzed [4+2] cycloaddition of methylene cyclic carbamates with dihydropyrazolone-derived alkenes: Synthesis of spiropyrazolones**

Biming Mao,<sup>ab</sup> Jiaqing Xu,<sup>a</sup> Wangyu Shi,<sup>a</sup> Wei Wang,<sup>c</sup> Yongjun Wu,<sup>c</sup> Yumei Xiao,<sup>\*a</sup> and Hongchao Guo<sup>\*a</sup>

<sup>a</sup> Department of Chemistry and Innovation Center of Pesticide Research, P. R. China  
Agricultural University, Beijing 100193, China

<sup>b</sup> Institute of Materia Medica, Shandong First Medical University & Shandong Academy  
of Medical Sciences, Jinan 250117, Shandong, P. R. China

<sup>c</sup> College of Public Health, Zhengzhou University, Zhengzhou 450001, P. R. China  
E-mail: hchguo@cau.edu.cn, xiaoyumei23@126.com

## Table of Contents

|                                                                |     |
|----------------------------------------------------------------|-----|
| General Information                                            | S2  |
| General Procedure for Pd-Catalyzed [4+2] Cycloaddition         | S2  |
| Screening Reaction Conditions for Asymmetric Reaction          | S3  |
| Characterization Data of the Products <b>3</b>                 | S5  |
| Scaled-up Synthesis of the Product <b>3aa</b>                  | S17 |
| Transformations of the Product <b>3aa</b>                      | S18 |
| <sup>1</sup> H and <sup>13</sup> C NMR Spectra of All Products | S20 |
| X-Ray Crystallographic Data of <b>3aa</b> and <b>4</b>         | S83 |

## General Information

All reactions were performed under Ar atmospheres in oven-dried glassware with magnetic stirring. Unless otherwise stated, all reagents were purchased from commercial suppliers and used without further purification. All solvents were purified and dried according to standard methods prior to use. Organic solutions were concentrated under reduced pressure on a rotary evaporator or an oil pump. Reactions were monitored through thin layer chromatography (TLC) on silica gel-precoated glass plates. Chromatograms were visualized by fluorescence quenching with UV light at 254 nm. Flash column chromatography was performed using Qingdao Haiyang flash silica gel (200–300 mesh). Infrared spectra were recorded using a Bruker Optics TENSOR 27 instrument.  $^1\text{H}$  and  $^{13}\text{C}$  NMR spectra were recorded in  $\text{CDCl}_3$  using a 300, 400 or 600 MHz NMR instrument (referenced internally to  $\text{Me}_4\text{Si}$ ).  $^1\text{H}$  NMR data are reported as follows: chemical shift, multiplicity (s = singlet; d = doublet; q = quartet; m = multiplet; br = broad), coupling constant (Hz), and integral. Data for  $^{13}\text{C}$  NMR spectra are reported in terms of chemical shift. Optical rotation was obtained on a Perkin-Elmer 343 polarimeter. Melting points were determined by an X-4 digital micro melting point apparatus. Accurate mass measurements were performed using an Agilent instrument with the ESI-MS technique. X-ray crystallographic data were collected using a Gemini E Rigaku.

Starting materials and reagents were purchased directly from commercial suppliers and used without further purifications. All solvents used as reaction medium were distilled before the use. The *N*-tosyl carbamate **1a**<sup>1</sup>, unsaturated pyrazolones **2**<sup>2</sup>, were synthesized using known literature procedures.

## General Procedure for Pd-Catalyzed [4+2] Cycloaddition

Under argon atmosphere, to a mixture of *N*-tosyl carbamate **1a** (0.15 mmol), unsaturated pyrazolones **2** (0.10 mmol) and catalyst  $\text{Pd}_2(\text{dba})_3 \cdot \text{CHCl}_3$  (2.5 mol%, 0.0025 mmol) / Xantphos (7.5 mol %, 0.0075 mmol) in a Schlenk tube, 1 mL of DCM were added at room temperature. The resulting mixture was stirred until the starting material were completely consumed (monitored by TLC) and then was concentrated to dryness. The residue was purified through flash column chromatography (11.1% EtOAc / PE) to afford the corresponding cycloaddition product **3**.

---

<sup>1</sup> Allen, B. D. W.; Connolly, M. J.; Harrity, J. P. A. *Chem. Eur. J.* **2016**, 22, 13000.

<sup>2</sup> Malerich, J. P.; Hagihara, K.; Rawal, V. H. *J. Am. Chem. Soc.* **2008**, 130, 14416.

**Table S1. Screening Reaction Conditions for Asymmetric Reaction of N-Tosyl Methylene Cyclic Carbamate **1a****

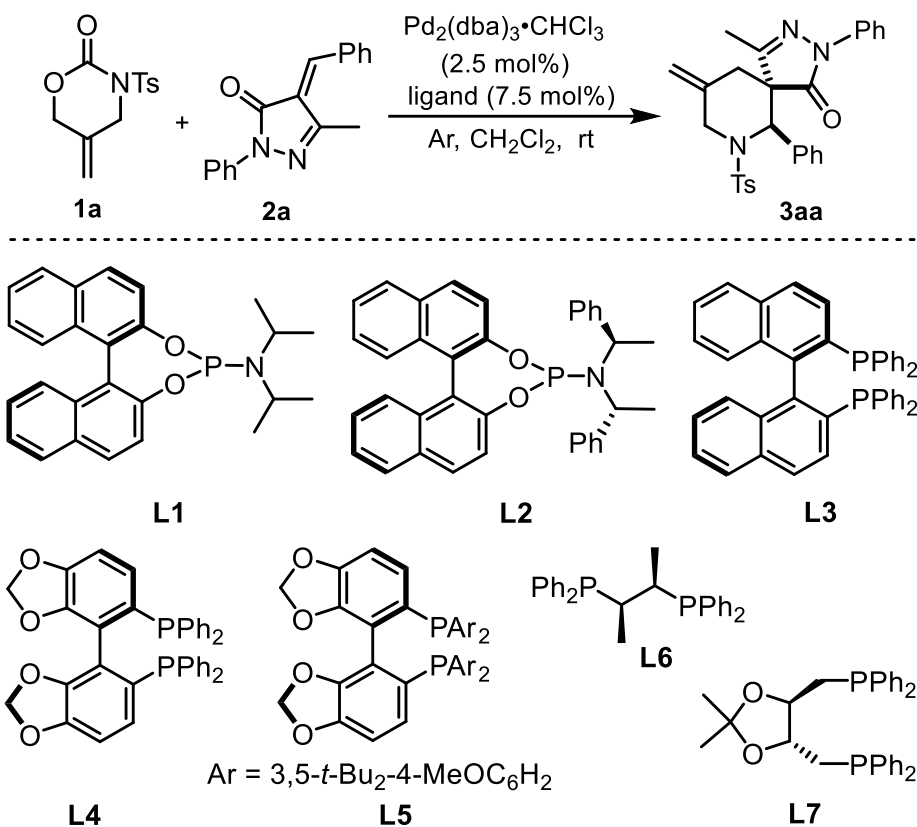

| entry | ligand    | t/h | yield (%) <sup>b</sup> | ee (%) <sup>c</sup> |
|-------|-----------|-----|------------------------|---------------------|
| 1     | <b>L1</b> | 24  | NR                     | -                   |
| 2     | <b>L2</b> | 24  | NR                     | -                   |
| 3     | <b>L3</b> | 24  | NR                     | -                   |
| 4     | <b>L4</b> | 24  | NR                     | -                   |
| 5     | <b>L5</b> | 24  | NR                     | -                   |
| 6     | <b>L6</b> | 24  | NR                     | -                   |
| 7     | <b>L7</b> | 24  | 51                     | 5                   |

<sup>a</sup> All reactions were carried out with N-tosyl methylene cyclic carbamate **1a** (0.15 mmol) and alkene **2a** (0.10 mmol) in 1 mL of CH<sub>2</sub>Cl<sub>2</sub>. <sup>b</sup> Isolated yield and dr is >20:1, determined by <sup>1</sup>H NMR analysis of the crude product. <sup>c</sup> Determined by chiral HPLC analysis.

**Table S2. Screening Reaction Conditions for Asymmetric Reaction of N-Boc Methylene Cyclic Carbamate **1b****

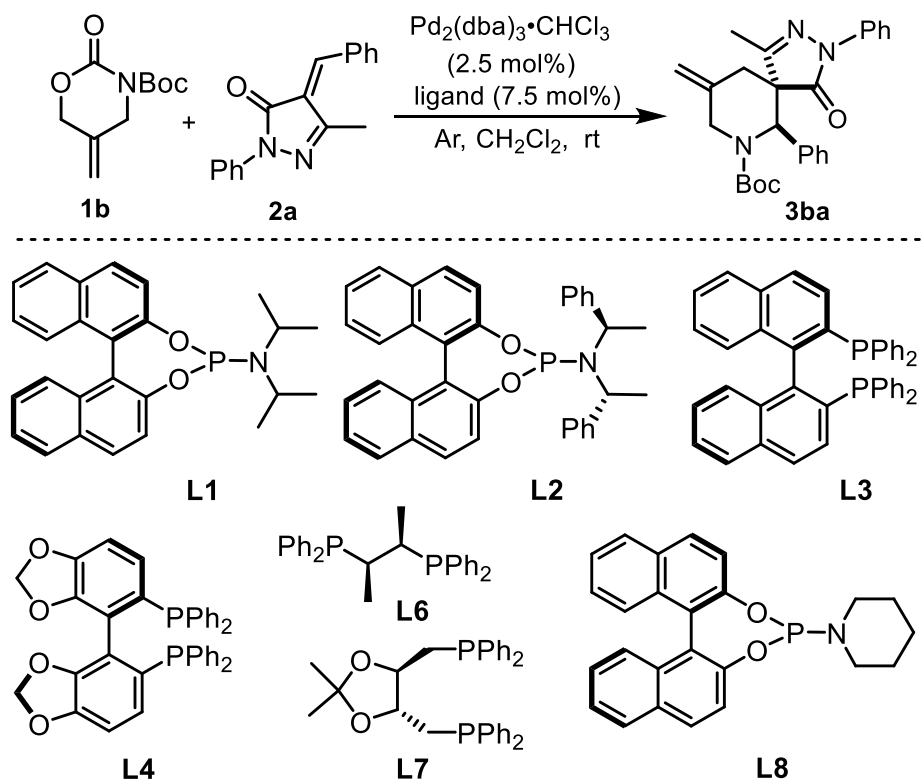

| entry | ligand    | t/h | yield (%) <sup>b</sup> | ee (%) <sup>c</sup> |
|-------|-----------|-----|------------------------|---------------------|
| 1     | <b>L1</b> | 72  | 17                     | 44                  |
| 2     | <b>L2</b> | 72  | 21                     | 39                  |
| 3     | <b>L3</b> | 48  | NR                     | -                   |
| 4     | <b>L4</b> | 48  | NR                     | -                   |
| 5     | <b>L6</b> | 48  | NR                     | -                   |
| 6     | <b>L7</b> | 24  | 14                     | 6                   |
| 7     | <b>L8</b> | 72  | 15                     | 50                  |

<sup>a</sup> All reactions were carried out with N-Boc cyclic carbamate **1b** (0.15 mmol) and alkene **2a** (0.10 mmol) in 1 mL of  $\text{CH}_2\text{Cl}_2$ . <sup>b</sup> Isolated yield, and dr is >20:1, determined by  $^1\text{H}$  NMR analysis of the crude product. <sup>c</sup> Determined by chiral HPLC analysis.

### Characterization Data of the Products 3

#### 4-methyl-9-methylene-2,6-diphenyl-7-tosyl-2,3,7-triazaspiro[4.5]dec-3-en-1-one (3aa)

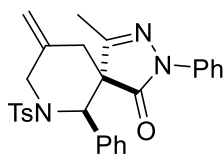

**3aa**

Prepared according to the general procedure as described above in 84% yield (40.7 mg). It was purified by flash chromatography (11.1% EtOAc/PE) to afford a white solid. mp = 187 – 190 °C; <sup>1</sup>H NMR (300 MHz, CDCl<sub>3</sub>) δ 7.70 – 7.58 (m, 2H), 7.53 – 7.43 (m, 2H), 7.30 – 7.07 (m, 10H), 5.29 (s, 1H), 5.12 (s, 1H), 4.91 (d, *J* = 2.3 Hz, 1H), 4.75 (s, 2H), 2.58 – 2.10 (m, 8H); <sup>13</sup>C NMR (75 MHz, CDCl<sub>3</sub>) δ 170.8, 160.0, 143.3, 136.9, 136.5, 136.3, 136.1, 129.2, 128.3, 128.1, 127.7, 126.9, 125.7, 124.9, 118.9, 111.8, 57.9, 57.5, 47.2, 33.5, 21.2, 14.2; IR (film) ν<sub>max</sub> 3063, 2923, 1708, 1596, 1499, 1452, 1397, 1347, 1285, 1257, 1183, 1119, 1092, 1053, 1008, 984, 936, 840, 811, 758, 736, 691, 638 cm<sup>-1</sup>; HRMS (ESI) calcd for C<sub>28</sub>H<sub>28</sub>N<sub>3</sub>O<sub>3</sub>S<sup>+</sup> [M+H]<sup>+</sup> 486.1846, found 486.1851.

#### 6-(2-fluorophenyl)-4-methyl-9-methylene-2-phenyl-7-tosyl-2,3,7-triazaspiro[4.5]dec-3-en-1-one (3ab)

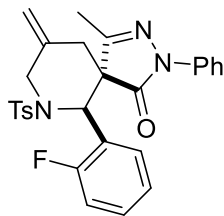

**3ab**

Prepared according to the general procedure as described above in 98% yield (49.3 mg). It was purified by flash chromatography (11.1% EtOAc/PE) to afford a white solid. mp = 166 – 169 °C; <sup>1</sup>H NMR (300 MHz, CDCl<sub>3</sub>) δ 7.68 – 7.50 (m, 3H), 7.43 – 6.88 (m, 10H), 5.55 (s, 1H), 5.16 (s, 1H), 5.00 – 4.70 (m, 3H), 2.48 – 2.12 (m, 8H); <sup>13</sup>C NMR (126 MHz, CDCl<sub>3</sub>) δ 170.8, 160.6, 159.2 (d, *J* = 245.4 Hz), 143.7, 137.2, 136.3, 135.9, 129.8 (d, *J* = 2.1 Hz), 129.7, 129.5, 129.3 (d, *J* = 3.4 Hz), 128.6, 127.2, 125.2, 124.1 (d, *J* = 3.6 Hz), 119.2, 114.9 (d, *J* = 22.6 Hz), 112.5, 57.2, 52.0, 48.0, 33.8, 21.6, 14.5; <sup>19</sup>F NMR (471 MHz, CDCl<sub>3</sub>) δ –116.29; IR (film) ν<sub>max</sub> 3065, 2925, 1708, 1615, 1596, 1499, 1456, 1435, 1396, 1349, 1306, 1286, 1226, 1184, 1120, 1091, 1054, 1009, 989, 932, 840, 807, 754, 735, 690, 660 cm<sup>-1</sup>; HRMS (ESI) calcd for C<sub>28</sub>H<sub>26</sub>FN<sub>3</sub>NaO<sub>3</sub>S<sup>+</sup> [M+Na]<sup>+</sup> 526.1571, found 526.1572.

**6-(3-fluorophenyl)-4-methyl-9-methylene-2-phenyl-7-tosyl-2,3,7-triazaspiro[4.5]dec-3-en-1-one (3ac)**

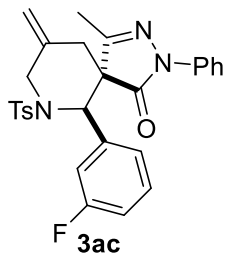

Prepared according to the general procedure as described above in 84% yield (42.3 mg). It was purified by flash chromatography (11.1% EtOAc/PE) to afford a white solid. mp = 147 – 150 °C;  $^1\text{H}$  NMR (300 MHz,  $\text{CDCl}_3$ )  $\delta$  7.74 – 7.46 (m, 4H), 7.40 – 7.07 (m, 6H), 6.86 (tdt,  $J$  = 6.0, 4.3, 1.9 Hz, 3H), 5.28 (s, 1H), 5.14 (d,  $J$  = 2.2 Hz, 1H), 4.93 (s, 1H), 4.75 (s, 2H), 2.51 – 2.06 (m, 8H);  $^{13}\text{C}$  NMR (126 MHz,  $\text{CDCl}_3$ )  $\delta$  170.9, 162.6 (d,  $J$  = 246.9 Hz), 160.1, 143.9, 139.5 (d,  $J$  = 6.7 Hz), 137.2, 136.2 (d,  $J$  = 4.1 Hz), 130.1 (d,  $J$  = 8.2 Hz), 129.7, 129.5, 128.6, 127.2, 127.1, 125.4, 121.6 (d,  $J$  = 3.0 Hz), 119.2, 115.1 (d,  $J$  = 21.0 Hz), 113.4 (d,  $J$  = 23.0 Hz), 112.4, 57.7, 57.6, 47.4, 33.9, 21.5, 14.4;  $^{19}\text{F}$  NMR (471 MHz,  $\text{CDCl}_3$ )  $\delta$  –112.01; IR (film)  $\nu_{\text{max}}$  3065, 2923, 2853, 1709, 1615, 1594, 1500, 1490, 1448, 1398, 1348, 1306, 1283, 1267, 1250, 1159, 1120, 1093, 1054, 1008, 984, 932, 874, 811, 770, 737, 690, 661  $\text{cm}^{-1}$ ; HRMS (ESI) calcd for  $\text{C}_{28}\text{H}_{26}\text{FN}_3\text{NaO}_3\text{S}^+$  [ $\text{M}+\text{Na}$ ] $^+$  526.1571, found 526.1575.

**6-(4-fluorophenyl)-4-methyl-9-methylene-2-phenyl-7-tosyl-2,3,7-triazaspiro[4.5]dec-3-en-1-one (3ad)**

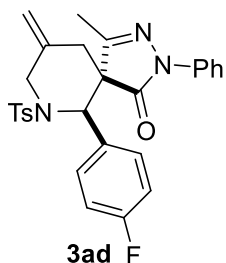

Prepared according to the general procedure as described above in 81% yield (40.7 mg). It was purified by flash chromatography (11.1% EtOAc/PE) to afford a light yellow solid. mp = 194 – 197 °C;  $^1\text{H}$  NMR (300 MHz,  $\text{CDCl}_3$ )  $\delta$  7.72 – 7.41 (m, 4H), 7.32 – 6.86 (m, 9H), 5.25 (s, 1H), 5.14 (s, 1H), 4.93 (d,  $J$  = 1.7 Hz, 1H), 4.75 (s, 2H), 2.54 – 2.11 (m, 8H);  $^{13}\text{C}$  NMR (126 MHz,  $\text{CDCl}_3$ )  $\delta$  171.0, 162.3 (d,  $J$  = 247.4 Hz), 160.2, 143.8, 137.1, 136.2 (d,  $J$  = 4.2 Hz), 132.8, 132.7, 129.5, 128.7, 127.9 (d,  $J$  = 8.3 Hz), 127.2, 125.4, 119.1, 115.3 (d,  $J$  = 21.7 Hz), 112.5, 57.7, 57.6, 47.4, 33.7, 21.5, 14.5;  $^{19}\text{F}$  NMR (471 MHz,  $\text{CDCl}_3$ )  $\delta$  –113.68; IR (film)  $\nu_{\text{max}}$  3064, 2924, 1707, 1596, 1509, 1500, 1435, 1398, 1365, 1306, 1284, 1197, 1160, 1119, 1091, 1053, 1008, 983, 931, 857, 811, 777, 735, 706, 689, 659  $\text{cm}^{-1}$ ; HRMS (ESI) calcd for  $\text{C}_{28}\text{H}_{26}\text{FN}_3\text{NaO}_3\text{S}^+$  [ $\text{M}+\text{Na}$ ] $^+$  526.1571, found 526.1575.

**6-(2-chlorophenyl)-4-methyl-9-methylene-2-phenyl-7-tosyl-2,3,7-triazaspiro[4.5]dec-3-en-1-one (3ae)**

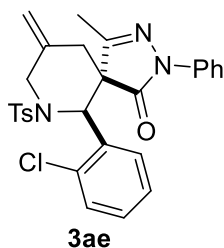

Prepared according to the general procedure as described above in 99% yield (51.4 mg). It was purified by flash chromatography (11.1% EtOAc/PE) to afford a white solid. mp = 160 – 163 °C;  $^1\text{H}$  NMR (300 MHz,  $\text{CDCl}_3$ )  $\delta$  7.85 – 7.57 (m, 3H), 7.51 – 6.92 (m, 10H), 5.80 (s, 1H), 5.31 – 4.54 (m, 4H), 2.75 – 1.76 (m, 8H);  $^{13}\text{C}$  NMR (126 MHz,  $\text{CDCl}_3$ )  $\delta$  170.5, 161.1, 143.4, 137.4, 135.8, 134.2, 133.1, 129.6, 129.4, 129.3, 129.2, 129.1, 128.8, 128.6, 127.6, 127.0, 126.4, 125.1, 119.2, 119.0, 113.3, 56.3, 53.9, 48.0, 33.3, 21.4, 16.2; IR (film)  $\nu_{\text{max}}$  3065, 2924, 1712, 1596, 1500, 1474, 1438, 1397, 1366, 1324, 1289, 1185, 1161, 1120, 1093, 1038, 989, 933, 838, 814, 758, 690, 660  $\text{cm}^{-1}$ ; HRMS (ESI) calcd for  $\text{C}_{28}\text{H}_{26}\text{ClN}_3\text{NaO}_3\text{S}^+$   $[\text{M}+\text{Na}]^+$  542.1276, found 542.1274.

**6-(3-chlorophenyl)-4-methyl-9-methylene-2-phenyl-7-tosyl-2,3,7-triazaspiro[4.5]dec-3-en-1-one (3af)**

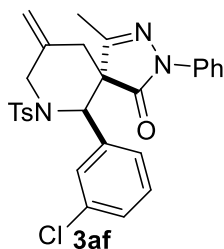

Prepared according to the general procedure as described above in 99% yield (51.4 mg). It was purified by flash chromatography (11.1% EtOAc/PE) to afford a white solid. mp = 116 – 119 °C;  $^1\text{H}$  NMR (300 MHz,  $\text{CDCl}_3$ )  $\delta$  7.72 – 7.46 (m, 4H), 7.34 – 6.94 (m, 9H), 5.25 (s, 1H), 5.15 (s, 1H), 4.94 (s, 1H), 4.80 – 4.67 (m, 2H), 2.49 – 2.13 (m, 8H);  $^{13}\text{C}$  NMR (126 MHz,  $\text{CDCl}_3$ )  $\delta$  170.9, 160.1, 143.9, 138.8, 137.2, 136.2, 136.2, 134.4, 129.6, 129.5, 128.6, 128.2, 127.1, 126.4, 125.4, 124.3, 119.2, 112.5, 57.7, 57.5, 47.5, 33.8, 21.5, 14.5; IR (film)  $\nu_{\text{max}}$  3065, 2924, 1708, 1596, 1575, 1499, 1435, 1399, 1365, 1306, 1282, 1256, 1198, 1161, 1119, 1092, 1054, 984, 939, 881, 811, 790, 755, 689, 660  $\text{cm}^{-1}$ ; HRMS (ESI) calcd for  $\text{C}_{28}\text{H}_{26}\text{ClN}_3\text{NaO}_3\text{S}^+$   $[\text{M}+\text{Na}]^+$  542.1276, found 542.1274.

**6-(4-chlorophenyl)-4-methyl-9-methylene-2-phenyl-7-tosyl-2,3,7-triazaspiro[4.5]dec-3-en-1-one (3ag)**

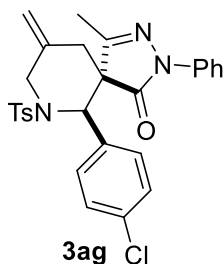

Prepared according to the general procedure as described above in 85% yield (44.1 mg). It was purified by flash chromatography (11.1% EtOAc/PE) to afford a white solid. mp = 205 – 208 °C; <sup>1</sup>H NMR (300 MHz, CDCl<sub>3</sub>) δ 7.67 – 7.48 (m, 4H), 7.36 – 7.04 (m, 9H), 5.24 (s, 1H), 5.14 (d, *J* = 2.2 Hz, 1H), 4.93 (s, 1H), 4.74 (s, 2H), 2.52 – 2.10 (m, 8H); <sup>13</sup>C NMR (126 MHz, CDCl<sub>3</sub>) δ 171.0, 160.2, 143.9, 137.2, 136.2, 136.2, 135.5, 133.9, 129.5, 128.7, 128.5, 127.6, 127.2, 125.4, 119.2, 112.5, 57.7, 57.6, 47.5, 33.8, 21.5, 14.5; IR (film) ν<sub>max</sub> 2924, 2854, 1708, 1596, 1492, 1436, 1399, 1365, 1348, 1306, 1282, 1183, 1162, 1119, 1092, 1054, 1013, 984, 934, 850, 813, 758, 679, 661 cm<sup>-1</sup>; HRMS (ESI) calcd for C<sub>28</sub>H<sub>26</sub>ClN<sub>3</sub>NaO<sub>3</sub>S<sup>+</sup> [M+Na]<sup>+</sup> 542.1276, found 542.1273.

**6-(4-bromophenyl)-4-methyl-9-methylene-2-phenyl-7-tosyl-2,3,7-triazaspiro[4.5]dec-3-en-1-one (3ah)**

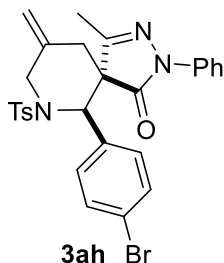

Prepared according to the general procedure as described above in 79% yield (44.5 mg). It was purified by flash chromatography (11.1% EtOAc/PE) to afford a white solid. mp = 194 – 197 °C; <sup>1</sup>H NMR (300 MHz, CDCl<sub>3</sub>) δ 7.69 – 7.46 (m, 4H), 7.39 – 6.93 (m, 9H), 5.22 (s, 1H), 5.14 (s, 1H), 4.93 (s, 1H), 4.73 (d, *J* = 3.6 Hz, 2H), 2.53 – 2.07 (m, 8H); <sup>13</sup>C NMR (126 MHz, CDCl<sub>3</sub>) δ 169.9, 159.2, 142.9, 136.1, 135.2, 135.1, 135.0, 130.5, 128.5, 127.7, 126.9, 126.2, 124.4, 121.1, 118.2, 111.5, 56.7, 56.5, 46.4, 32.8, 20.5, 13.5; IR (film) ν<sub>max</sub> 3066, 2924, 1708, 1596, 1490, 1457, 1435, 1398, 1365, 1348, 1306, 1281, 1183, 1163, 1119, 1092, 1075, 1054, 1009, 983, 934, 849, 813, 758, 690, 663, 634 cm<sup>-1</sup>; HRMS (ESI) calcd for C<sub>28</sub>H<sub>26</sub>BrN<sub>3</sub>NaO<sub>3</sub>S<sup>+</sup> [M+Na]<sup>+</sup> 586.0770, found 586.0770.



**4-methyl-9-methylene-2-phenyl-6-(m-tolyl)-7-tosyl-2,3,7-triazaspiro[4.5]dec-3-en-1-one (3ai)**

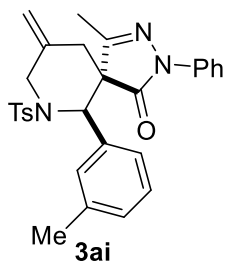

Prepared according to the general procedure as described above in 82% yield (40.9 mg). It was purified by flash chromatography (11.1% EtOAc/PE) to afford a white solid. mp = 138 – 140 °C;  $^1\text{H}$  NMR (300 MHz,  $\text{CDCl}_3$ )  $\delta$  7.69 – 7.45 (m, 4H), 7.37 – 6.79 (m, 9H), 5.27 (s, 1H), 5.13 (d,  $J$  = 2.0 Hz, 1H), 4.93 (s, 1H), 4.74 (s, 2H), 2.47 – 2.08 (m, 11H);  $^{13}\text{C}$  NMR (126 MHz,  $\text{CDCl}_3$ )  $\delta$  171.2, 160.5, 143.5, 137.9, 137.4, 136.7, 136.5, 129.4, 128.8, 128.6, 128.3, 127.3, 126.7, 125.2, 123.2, 119.3, 112.2, 58.3, 57.8, 47.6, 33.9, 21.4, 21.3, 14.5; IR (film)  $\nu_{\text{max}}$  3063, 2923, 1706, 1596, 1499, 1457, 1435, 1399, 1364, 1346, 1306, 1284, 1158, 1119, 1092, 1053, 1008, 984, 947, 930, 856, 811, 754, 733, 690, 659  $\text{cm}^{-1}$ ; HRMS (ESI) calcd for  $\text{C}_{29}\text{H}_{29}\text{N}_3\text{NaO}_3\text{S}^+$   $[\text{M}+\text{Na}]^+$  522.1822, found 522.1825.

**4-methyl-9-methylene-2-phenyl-6-(p-tolyl)-7-tosyl-2,3,7-triazaspiro[4.5]dec-3-en-1-one (3aj)**

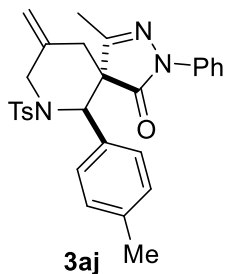

Prepared according to the general procedure as described above in 62% yield (30.9 mg). It was purified by flash chromatography (11.1% EtOAc/PE) to afford a white solid. mp = 160 – 163 °C;  $^1\text{H}$  NMR (300 MHz,  $\text{CDCl}_3$ )  $\delta$  7.68 – 7.44 (m, 4H), 7.36 – 7.07 (m, 5H), 6.99 (s, 4H), 5.26 (s, 1H), 5.13 (s, 1H), 4.99 – 4.86 (m, 1H), 4.72 (s, 2H), 2.48 – 2.13 (m, 11H);  $^{13}\text{C}$  NMR (126 MHz,  $\text{CDCl}_3$ )  $\delta$  171.2, 160.6, 143.5, 137.7, 137.4, 136.7, 136.4, 133.9, 129.4, 129.1, 128.6, 127.3, 126.1, 125.2, 119.3, 112.3, 58.2, 57.8, 47.6, 33.9, 21.5, 20.9, 14.6; IR (film)  $\nu_{\text{max}}$  3031, 2923, 1707, 1596, 1514, 1499, 1436, 1398, 1364, 1346, 1306, 1283, 1230, 1185, 1160, 1119, 1092, 1073, 1054, 1019, 1008, 983, 933, 851, 813, 755, 690, 660,  $\text{cm}^{-1}$ ; HRMS (ESI) calcd for  $\text{C}_{29}\text{H}_{29}\text{N}_3\text{NaO}_3\text{S}^+$   $[\text{M}+\text{Na}]^+$  522.1822, found 522.1822.

**6-(3-methoxyphenyl)-4-methyl-9-methylene-2-phenyl-7-tosyl-2,3,7-triazaspiro[4.5]dec-3-en-1-one (3ak)**

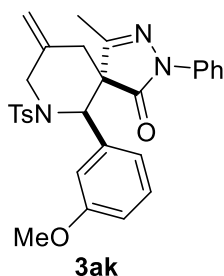

Prepared according to the general procedure as described above in 80% yield (41.2 mg). It was purified by flash chromatography (11.1% EtOAc/PE) to afford a white solid. mp = 171 – 174 °C;  $^1\text{H}$  NMR (300 MHz,  $\text{CDCl}_3$ )  $\delta$  7.73 – 7.47 (m, 4H), 7.39 – 7.04 (m, 7H), 6.80 – 6.51 (m, 2H), 5.30 (s, 1H), 5.13 (s, 1H), 4.92 (s, 1H), 4.73 (s, 2H), 3.65 (s, 3H), 2.48 – 2.15 (m, 8H);  $^{13}\text{C}$  NMR (126 MHz,  $\text{CDCl}_3$ )  $\delta$  171.1, 160.5, 159.5, 143.6, 138.4, 137.3, 136.5, 136.4, 129.8, 129.6, 129.5, 128.6, 127.2, 127.1, 125.2, 119.2, 118.2, 113.6, 112.2, 111.7, 58.1, 57.7, 55.0, 47.5, 34.0, 21.5, 14.5; IR (film)  $\nu_{\text{max}}$  3064, 2924, 1709, 1654, 1597, 1491, 1457, 1436, 1398, 1364, 1346, 1306, 1285, 1274, 1256, 1158, 1092, 1050, 1008, 984, 930, 867, 812, 756, 736, 691  $\text{cm}^{-1}$ ; HRMS (ESI) calcd for  $\text{C}_{29}\text{H}_{29}\text{N}_3\text{NaO}_4\text{S}^+$   $[\text{M}+\text{Na}]^+$  538.1771, found 538.1772.

**4-methyl-9-methylene-6-(naphthalen-2-yl)-2-phenyl-7-tosyl-2,3,7-triazaspiro[4.5]dec-3-en-1-one (3al)**

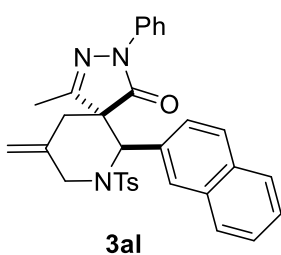

Prepared according to the general procedure as described above in 87% yield (46.5 mg). It was purified by flash chromatography (11.1% EtOAc/PE) to afford a white solid. mp = 186 – 189 °C;  $^1\text{H}$  NMR (300 MHz,  $\text{CDCl}_3$ )  $\delta$  7.78 – 7.39 (m, 10H), 7.28 – 7.00 (m, 6H), 5.49 (s, 1H), 5.18 (s, 1H), 4.97 (t,  $J$  = 1.7 Hz, 1H), 4.83 (s, 2H), 2.53 – 2.26 (m, 8H);  $^{13}\text{C}$  NMR (126 MHz,  $\text{CDCl}_3$ )  $\delta$  171.1, 160.7, 143.6, 141.8, 137.3, 136.6, 136.4, 134.0, 132.9, 132.8, 129.7, 129.3, 128.5, 128.2, 128.1, 127.4, 127.1, 126.1, 125.9, 125.2, 123.7, 119.2, 118.1, 112.4, 58.5, 57.8, 53.0, 47.6, 34.2, 21.3, 14.7; IR (film)  $\nu_{\text{max}}$  3033, 2923, 1705, 1615, 1597, 1512, 1495, 1452, 1436, 1364, 1347, 1306, 1285, 1185, 1161, 1126, 1092, 1051, 1008, 984, 936, 841, 817, 789, 738, 697, 661  $\text{cm}^{-1}$ ; HRMS (ESI) calcd for  $\text{C}_{32}\text{H}_{29}\text{N}_3\text{NaO}_3\text{S}^+$   $[\text{M}+\text{Na}]^+$  558.1822, found 558.1825.

**2-(2-fluorophenyl)-4-methyl-9-methylene-6-phenyl-7-tosyl-2,3,7-triazaspiro[4.5]dec-3-en-1-one (3am)**

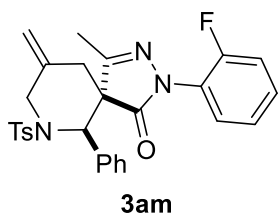

Prepared according to the general procedure as described above in 58% yield (29.2 mg). It was purified by flash chromatography (11.1% EtOAc/PE) to afford a light yellow solid. mp = 189 – 191 °C;  $^1\text{H}$  NMR (300 MHz,  $\text{CDCl}_3$ )  $\delta$  7.66 (d,  $J$  = 8.3 Hz, 2H), 7.31 – 6.74 (m, 11H), 5.32 (s, 1H), 5.12 (d,  $J$  = 2.3 Hz, 1H), 4.98 – 4.89 (m, 1H), 4.86 – 4.66 (m, 2H), 2.53 – 2.12 (m, 8H);  $^{13}\text{C}$  NMR (126 MHz,  $\text{CDCl}_3$ )  $\delta$  171.7, 160.4, 156.5 (d,  $J$  = 253.7 Hz), 143.7, 136.9, 136.4, 136.3, 129.5, 129.3 (d,  $J$  = 7.7 Hz), 128.5, 128.1, 127.3, 126.8, 125.9, 124.1 (d,  $J$  = 3.8 Hz), 124.0, 123.9, 116.5 (d,  $J$  = 19.4 Hz), 112.3, 58.1, 56.6, 47.6, 33.6, 21.5, 14.4;  $^{19}\text{F}$  NMR (471 MHz,  $\text{CDCl}_3$ )  $\delta$  –119.18; IR (film)  $\nu_{\text{max}}$  3064, 2925, 1716, 1614, 1596, 1506, 1461, 1435, 1370, 1347, 1306, 1283, 1269, 1227, 1197, 1161, 1121, 1092, 1030, 1007, 982, 936, 842, 812, 793, 759, 736, 697  $\text{cm}^{-1}$ ; HRMS (ESI) calcd for  $\text{C}_{28}\text{H}_{26}\text{FN}_3\text{NaO}_3\text{S}^+$   $[\text{M}+\text{Na}]^+$  526.1571, found 526.1571.

**2-(3-fluorophenyl)-4-methyl-9-methylene-6-phenyl-7-tosyl-2,3,7-triazaspiro[4.5]dec-3-en-1-one (3an)**

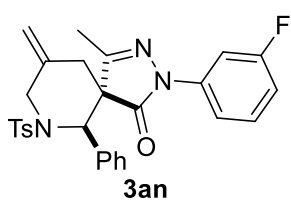

Prepared according to the general procedure as described above in 80% yield (40.2 mg). It was purified by flash chromatography (11.1% EtOAc/PE) to afford a white solid. mp = 163 – 166 °C;  $^1\text{H}$  NMR (300 MHz,  $\text{CDCl}_3$ )  $\delta$  7.66 – 7.57 (m, 2H), 7.43 – 6.74 (m, 11H), 5.30 (s, 1H), 5.14 (d,  $J$  = 2.1 Hz, 1H), 4.94 (t,  $J$  = 1.7 Hz, 1H), 4.74 (s, 2H), 2.62 – 2.13 (m, 8H);  $^{13}\text{C}$  NMR (126 MHz,  $\text{CDCl}_3$ )  $\delta$  171.2, 162.6 (d,  $J$  = 244.9 Hz), 160.7, 143.6, 136.7, 136.4, 136.3, 129.8 (d,  $J$  = 9.1 Hz), 129.4, 128.4, 128.1, 127.2, 126.0, 114.2 (d,  $J$  = 3.1 Hz), 112.4, 111.7 (d,  $J$  = 21.2 Hz), 106.3 (d,  $J$  = 26.8 Hz), 58.2, 58.0, 47.5, 33.8, 21.5, 14.5;  $^{19}\text{F}$  NMR (471 MHz,  $\text{CDCl}_3$ )  $\delta$  –111.56; IR (film)  $\nu_{\text{max}}$  2925, 1714, 1611, 1594, 1492, 1453, 1348, 1306, 1283, 1210, 1185, 1162, 1115, 1093, 1010, 937, 905, 865, 843, 780, 680, 661  $\text{cm}^{-1}$ ; HRMS (ESI) calcd for  $\text{C}_{28}\text{H}_{26}\text{FN}_3\text{NaO}_3\text{S}^+$   $[\text{M}+\text{Na}]^+$  526.1571, found 526.1572.

**2-(4-fluorophenyl)-4-methyl-9-methylene-6-phenyl-7-tosyl-2,3,7-triazaspiro[4.5]dec-3-en-1-one (3ao)**

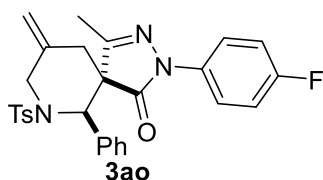

Prepared according to the general procedure as described above in 74% yield (37.2 mg). It was purified by flash chromatography (11.1% EtOAc/PE) to afford a white solid. mp = 198 – 201 °C; <sup>1</sup>H NMR (300 MHz, CDCl<sub>3</sub>) δ 7.68 – 7.36 (m,

4H), 7.33 – 6.89 (m, 9H), 5.29 (s, 1H), 5.13 (d, *J* = 2.2 Hz, 1H), 4.93 (t, *J* = 1.7 Hz, 1H), 4.75 (s, 2H), 2.54 – 2.13 (m, 8H); <sup>13</sup>C NMR (126 MHz, CDCl<sub>3</sub>) δ 171.1, 160.5, 160.0 (d, *J* = 245.0 Hz), 143.6, 136.8, 136.5, 136.3, 133.3 (d, *J* = 2.8 Hz), 129.7, 129.4, 128.4, 128.1, 127.2, 127.1, 126.0, 121.1 (d, *J* = 8.0 Hz), 115.3 (d, *J* = 22.5 Hz), 112.2, 58.2, 57.7, 47.5, 33.7, 21.5, 14.4; <sup>19</sup>F NMR (471 MHz, CDCl<sub>3</sub>) δ –116.62; IR (film) ν<sub>max</sub> 2925, 1709, 1598, 1508, 1452, 1436, 1348, 1306, 1285, 1218, 1162, 1120, 1093, 1008, 983, 937, 869, 836, 765, 697, 661 cm<sup>-1</sup>; HRMS (ESI) calcd for C<sub>28</sub>H<sub>26</sub>FN<sub>3</sub>NaO<sub>3</sub>S<sup>+</sup> [M+Na]<sup>+</sup> 526.1571, found 526.1571.

**2-(4-chlorophenyl)-4-methyl-9-methylene-6-phenyl-7-tosyl-2,3,7-triazaspiro[4.5]dec-3-en-1-one (3ap)**

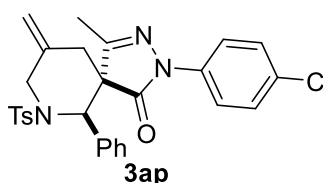

Prepared according to the general procedure as described above in 98% yield (50.8 mg). It was purified by flash chromatography (11.1% EtOAc/PE) to afford a white solid.

mp = 200 – 203 °C; <sup>1</sup>H NMR (300 MHz, CDCl<sub>3</sub>) δ 7.66 – 7.45 (m, 4H), 7.26 – 7.01 (m, 9H), 5.29 (s, 1H), 5.14 (d, *J* = 2.2 Hz, 1H), 4.93 (d, *J* = 1.9 Hz, 1H), 4.74 (s, 2H), 2.53 – 2.17 (m, 8H); <sup>13</sup>C NMR (126 MHz, CDCl<sub>3</sub>) δ 171.1, 160.7, 143.7, 136.7, 136.4, 136.3, 135.8, 129.5, 128.6, 128.4, 128.1, 127.2, 126.0, 120.2, 112.3, 58.2, 57.9, 47.5, 33.7, 21.5, 14.5; IR (film) ν<sub>max</sub> 3064, 2925, 1709, 1596, 1492, 1451, 1436, 1416, 1397, 1363, 1349, 1324, 1306, 1285, 1202, 1184, 1160, 1123, 1092, 1052, 1011, 989, 937, 859, 830, 769, 738, 699, 679 cm<sup>-1</sup>; HRMS (ESI) calcd for C<sub>28</sub>H<sub>26</sub>ClN<sub>3</sub>NaO<sub>3</sub>S<sup>+</sup> [M+Na]<sup>+</sup> 542.1276, found 542.1275.

**4-methyl-9-methylene-6-phenyl-2-(p-tolyl)-7-tosyl-2,3,7-triazaspiro[4.5]dec-3-en-1-one (3aq)**

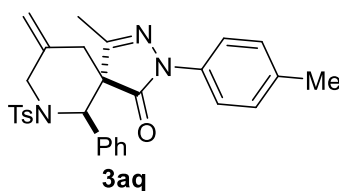

Prepared according to the general procedure as described above in 72% yield (35.9 mg). It was purified by flash chromatography (11.1% EtOAc/PE) to afford a white solid.

mp = 187 – 189 °C;  $^1\text{H}$  NMR (300 MHz,  $\text{CDCl}_3$ )  $\delta$  7.71 – 7.55 (m, 2H), 7.38 – 7.01 (m, 11H), 5.29 (s, 1H), 5.12 (d,  $J$  = 2.2 Hz, 1H), 4.92 (s, 1H), 4.77 (d,  $J$  = 3.7 Hz, 2H), 2.53 – 2.12 (m, 11H);  $^{13}\text{C}$  NMR (126 MHz,  $\text{CDCl}_3$ )  $\delta$  170.0, 159.1, 142.6, 135.9, 135.6, 135.4, 133.9, 133.8, 128.4, 128.1, 127.3, 127.0, 126.2, 125.0, 118.3, 111.1, 57.2, 56.7, 46.5, 32.8, 20.4, 19.8, 13.4; IR (film)  $\nu_{\text{max}}$  3062, 2923, 1709, 1596, 1499, 1437, 1396, 1345, 1306, 1287, 1237, 1158, 1120, 1092, 1008, 984, 935, 892, 865, 780, 757, 689 $\text{cm}^{-1}$ ; HRMS (ESI) calcd for  $\text{C}_{29}\text{H}_{29}\text{N}_3\text{NaO}_3\text{S}^+$   $[\text{M}+\text{Na}]^+$  522.1822, found 522.1822.

**2-(4-methoxyphenyl)-4-methyl-9-methylene-6-phenyl-7-tosyl-2,3,7-triazaspiro[4.5]dec-3-en-1-one (3ar)**

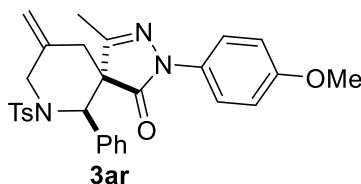

Prepared according to the general procedure as described above in 63% yield (32.4 mg). It was purified by flash chromatography (11.1% EtOAc/PE) to afford a white solid.

mp = 120 – 123 °C;  $^1\text{H}$  NMR (300 MHz,  $\text{CDCl}_3$ )  $\delta$  7.69 – 7.58 (m, 2H), 7.31 – 7.07 (m, 9H), 6.86 – 6.70 (m, 2H), 5.28 (s, 1H), 5.12 (s, 1H), 4.92 (s, 1H), 4.77 (d,  $J$  = 6.2 Hz, 2H), 3.77 (s, 3H), 2.51 – 2.10 (m, 8H);  $^{13}\text{C}$  NMR (126 MHz,  $\text{CDCl}_3$ )  $\delta$  170.9, 160.0, 157.2, 143.6, 137.0, 136.6, 136.4, 130.5, 129.4, 128.3, 128.0, 127.3, 126.0, 121.3, 113.8, 112.0, 58.2, 57.5, 55.4, 47.6, 33.7, 21.5, 14.3; IR (film)  $\nu_{\text{max}}$  2929, 1703, 1597, 1509, 1440, 1401, 1369, 1347, 1298, 1285, 1246, 1183, 1161, 1122, 1093, 1031, 1007, 983, 937, 910, 832, 752, 739, 697  $\text{cm}^{-1}$ ; HRMS (ESI) calcd for  $\text{C}_{29}\text{H}_{30}\text{N}_3\text{O}_4\text{S}^+$   $[\text{M}+\text{H}]^+$  516.1952, found 516.1953.

**4-ethyl-9-methylene-2,6-diphenyl-7-tosyl-2,3,7-triazaspiro[4.5]dec-3-en-1-one (3as)**

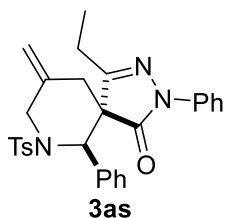

Prepared according to the general procedure as described above in 86% yield (42.9 mg). It was purified by flash chromatography (11.1% EtOAc/PE) to afford a light yellow solid. mp = 152 – 155 °C; <sup>1</sup>H NMR (300 MHz, CDCl<sub>3</sub>) δ 7.71 – 7.45 (m, 4H), 7.33 – 7.06 (m, 10H), 5.34 (s, 1H), 5.11 (s, 1H), 4.91 (s, 1H), 4.83 – 4.69 (m, 2H), 2.86 – 2.69 (m, 1H), 2.53 – 2.18 (m, 6H), 1.44 (t, *J* = 7.3 Hz, 3H); <sup>13</sup>C NMR (126 MHz, CDCl<sub>3</sub>) δ 170.4, 163.0, 142.6, 136.4, 136.0, 135.8, 135.5, 128.4, 127.5, 127.3, 126.9, 126.2, 124.9, 124.1, 118.2, 110.9, 57.3, 57.0, 46.5, 33.1, 20.5, 20.4, 8.6; IR (film) ν<sub>max</sub> 3064, 2925, 1707, 1597, 1499, 1456, 1386, 1347, 1285, 1236, 1183, 1161, 1122, 1092, 1053, 1007, 970, 933, 839, 812, 757, 737, 692, 669 cm<sup>-1</sup>; HRMS (ESI) calcd for C<sub>29</sub>H<sub>29</sub>N<sub>3</sub>NaO<sub>3</sub>S<sup>+</sup> [M+Na]<sup>+</sup> 522.1822, found 522.1825.

**9-methylene-2,6-diphenyl-4-propyl-7-tosyl-2,3,7-triazaspiro[4.5]dec-3-en-1-one (3at)**

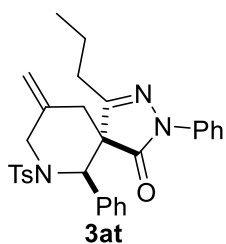

Prepared according to the general procedure as described above in 88% yield (45.1 mg). It was purified by flash chromatography (11.1% EtOAc/PE) to afford a white solid. mp = 171 – 174 °C; <sup>1</sup>H NMR (300 MHz, CDCl<sub>3</sub>) δ 7.74 – 7.44 (m, 4H), 7.37 – 7.03 (m, 10H), 5.33 (s, 1H), 5.11 (d, *J* = 2.4 Hz, 1H), 4.90 (s, 1H), 4.84 – 4.69 (m, 2H), 2.68 (ddd, *J* = 17.1, 8.8, 6.4 Hz, 1H), 2.45 (s, 3H), 2.39 – 2.14 (m, 3H), 2.00 – 1.82 (m, 2H), 1.16 (t, *J* = 7.4 Hz, 3H); <sup>13</sup>C NMR (126 MHz, CDCl<sub>3</sub>) δ 171.39, 162.9, 143.6, 137.4, 137.2, 136.8, 136.5, 129.5, 128.5, 128.4, 127.9, 127.3, 125.7, 125.1, 119.2, 111.8, 58.2, 58.1, 47.5, 34.1, 29.9, 21.5, 19.0, 14.0; IR (film) ν<sub>max</sub> 3064, 2963, 1708, 1597, 1499, 1456, 1379, 1348, 1286, 1222, 1183, 1161, 1123, 1091, 987, 937, 840, 813, 757, 738, 691 cm<sup>-1</sup>; HRMS (ESI) calcd for C<sub>30</sub>H<sub>31</sub>N<sub>3</sub>NaO<sub>3</sub>S<sup>+</sup> [M+Na]<sup>+</sup> 536.1978, found 536.1982.



**9-methylene-2,6-diphenyl-4-(p-tolyl)-7-tosyl-2,3,7-triazaspiro[4.5]dec-3-en-1-one (3aw)**

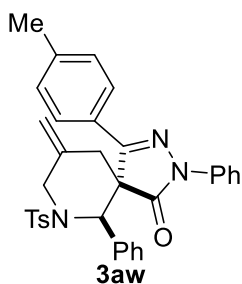

Prepared according to the general procedure as described above in 99% yield (55.5 mg). It was purified by flash chromatography (11.1% EtOAc/PE) to afford a white solid. mp = 187 – 189 °C; <sup>1</sup>H NMR (300 MHz, CDCl<sub>3</sub>) δ 8.03 – 7.89 (m, 2H), 7.75 – 7.60 (m, 2H), 7.60 – 7.49 (m, 5H), 7.36 – 7.12 (m, 6H), 7.00 – 6.85 (m, 4H), 5.81 (s, 1H), 5.23 – 4.79 (m, 4H), 3.14 (dd, *J* = 16.7, 2.6 Hz, 1H), 2.57 (d, *J* = 16.0 Hz, 1H), 2.46 (s, 3H), 2.21 (s, 3H); <sup>13</sup>C NMR (126 MHz, CDCl<sub>3</sub>) δ 170.8, 156.6, 142.4, 136.5, 136.4, 136.2, 136.0, 133.5, 129.5, 128.9, 128.5, 128.1, 127.9, 127.5, 126.3, 126.2, 124.5, 124.4, 118.7, 110.1, 57.4, 57.2, 46.7, 34.5, 20.5, 19.9; IR (film) ν<sub>max</sub> 3062, 2923, 2359, 1711, 1597, 1515, 1492, 1443, 1402, 1380, 1347, 1316, 1283, 1259, 1203, 1185, 1162, 1133, 1098, 1070, 1039, 1024, 970, 938, 852, 812, 765, 691 cm<sup>-1</sup>; HRMS (ESI) calcd for C<sub>34</sub>H<sub>31</sub>N<sub>3</sub>NaO<sub>3</sub>S<sup>+</sup> [M+Na]<sup>+</sup> 584.1978, found 584.1978.

**4-(4-methoxyphenyl)-9-methylene-2,6-diphenyl-7-tosyl-2,3,7-triazaspiro[4.5]dec-3-en-1-one (3ax)**

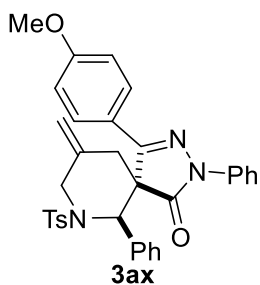

Prepared according to the general procedure as described above in 67% yield (38.7 mg). It was purified by flash chromatography (11.1% EtOAc/PE) to afford a white solid. mp = 174 – 177 °C; <sup>1</sup>H NMR (300 MHz, CDCl<sub>3</sub>) δ 8.02 – 7.87 (m, 2H), 7.71 – 7.49 (m, 7H), 7.37 – 7.11 (m, 6H), 6.96 – 6.89 (m, 2H), 6.71 – 6.57 (m, 2H), 5.76 (s, 1H), 5.24 – 4.81 (m, 4H), 3.69 (s, 3H), 3.14 (dd, *J* = 16.0, 2.3 Hz, 1H), 2.58 (d, *J* = 16.0 Hz, 1H), 2.46 (s, 3H); <sup>13</sup>C NMR (126 MHz, CDCl<sub>3</sub>) δ 171.9, 159.0, 157.5, 143.4, 137.4, 137.2, 137.0, 130.6, 129.9, 129.6, 129.5, 129.1, 128.6, 127.3, 127.1, 126.9, 125.6, 119.7, 113.6, 111.2, 58.6, 58.0, 55.1, 47.8, 35.4, 21.5; IR (film) ν<sub>max</sub> 2932, 2837, 2360, 1712, 1611, 1597, 1513, 1493, 1458, 1443, 1380, 1347, 1306, 1284, 1250, 1178, 1162, 1134, 1099, 1070, 1035, 970, 939, 917, 854, 815, 765, 756, 691, 671 cm<sup>-1</sup>; HRMS (ESI) calcd for C<sub>34</sub>H<sub>31</sub>N<sub>3</sub>NaO<sub>4</sub>S<sup>+</sup> [M+Na]<sup>+</sup> 600.1927, found 600.1923.



**tert-butyl (5R,6R)-1-methyl-9-methylene-4-oxo-3,6-diphenyl-2,3,7-triazaspiro[4.5]dec-1-ene-7-carboxylate (3ba)**

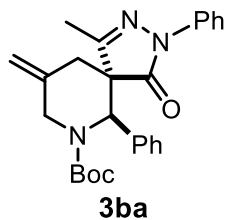

Prepared according to the general procedure as described above in 55 % yield (23.8 mg). It was purified by flash chromatography (11.1% EtOAc/PE) to afford a yellow oil. <sup>1</sup>H NMR (500 MHz, CDCl<sub>3</sub>) δ 7.49 – 7.46 (m, 2H), 7.26 (d, *J* = 6.3 Hz, 1H), 7.25 – 7.19 (m, 3H), 7.19 – 7.15 (m, 1H), 7.12 – 7.07 (m, 3H), 5.33 (s, 1H), 5.08 (s, 1H), 4.94 (s, 1H), 4.88 (d, *J* = 16.5 Hz, 1H), 4.62 (dd, *J* = 16.5, 2.2 Hz, 1H), 2.73 (dd, *J* = 15.5, 2.2 Hz, 1H), 2.57 (d, *J* = 15.5 Hz, 1H), 2.35 (s, 3H), 1.34 (s, 9H); <sup>13</sup>C NMR (126 MHz, CDCl<sub>3</sub>) δ 171.60, 160.67, 154.95, 138.32, 137.89, 137.40, 128.63, 128.36, 127.81, 125.87, 125.21, 119.37, 111.32, 80.74, 57.82, 57.57, 45.98, 34.35, 28.25, 14.60; IR (film)  $\nu_{\text{max}}$  2977, 2929, 1691, 1596, 1499, 1453, 1394, 1363, 1304, 1278, 1244, 1156, 1117, 959, 892 cm<sup>-1</sup>; HRMS (ESI) calcd for C<sub>26</sub>H<sub>30</sub>N<sub>3</sub>O<sub>3</sub><sup>+</sup> [M+H]<sup>+</sup> 432.2287, found 432.2291.

**Scaled-up Synthesis of the Product 3aa**

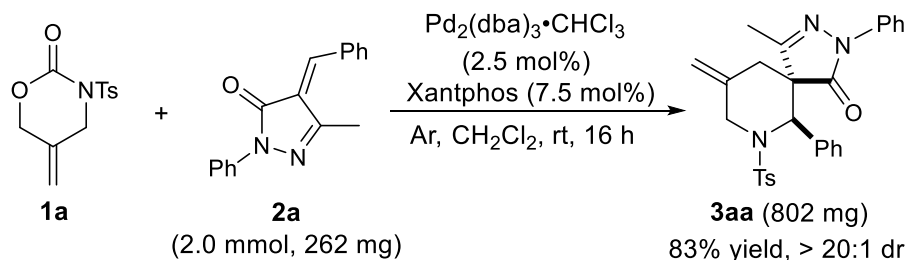

Under argon atmosphere, to a mixture of *N*-tosyl carbamate **1a** (3.0 mmol), unsaturated pyrazolones **2a** (2.0 mmol) and catalyst Pd<sub>2</sub>(dba)<sub>3</sub>·CHCl<sub>3</sub> (2.5 mol%, 0.05 mmol) / Xantphos (7.5 mol %, 0.15 mmol) in a Schlenk tube, 20 mL of DCM were added at room temperature. The resulting mixture was stirred until the starting material were completely consumed (monitored by TLC) and then was concentrated to dryness. The residue was purified through flash column chromatography (11.1% EtOAc / PE) to afford the corresponding cycloaddition product **3aa** with 83% yield (802 mg) and dr > 20:1.

## Transformations of the Product **3aa**

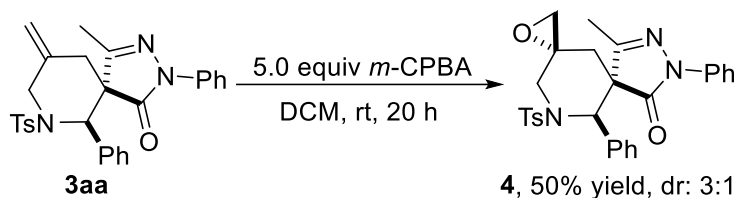

To a solution of **3aa** (0.10 mmol, 1.0 equiv.) in dichloromethane (3 mL) was added the dichloromethane solution of *m*-CPBA (0.50 mmol, 0.50 M, 1.0 mL) dropwise at 0 °C under room temperature. The reaction mixture was sealed under nitrogen and stirred for 12 hours. The reaction was then quenched with saturated NaHCO<sub>3</sub> solution and extracted with dichloromethane. The combined organic phase was collected and dried with Na<sub>2</sub>SO<sub>4</sub>. After filtration and evaporation, the residue was purified by silica gel chromatography (hexanes/EA = 6:1) to afford a white solid **4** (25.0 mg, 50% yield with dr: 3:1). mp = 123 – 125 °C; <sup>1</sup>H NMR (300 MHz, CDCl<sub>3</sub>) δ 7.85 – 7.69 (m, 1H), 7.61 – 7.06 (m, 13H), 5.30 (s, 1H), 4.68 (d, *J* = 15.8 Hz, 1H), 4.00 (dd, *J* = 15.7, 1.4 Hz, 1H), 2.92 – 2.18 (m, 8H), 1.86 – 1.53 (m, 2H); <sup>13</sup>C NMR (75 MHz, CDCl<sub>3</sub>) δ 171.2, 159.4, 143.5, 136.6, 136.2, 136.0, 129.2, 128.3, 128.1, 127.3, 125.5, 119.1, 58.0, 57.6, 53.8, 52.4, 48.2, 32.0, 21.2, 13.7; IR (film) ν<sub>max</sub> 3063, 2923, 2359, 1706, 1596, 1499, 1456, 1436, 1399, 1366, 1346, 1307, 1287, 1199, 1184, 1161, 1120, 1091, 1051, 1007, 988, 961, 887, 860, 758, 693 cm<sup>-1</sup>; HRMS (ESI) calcd for C<sub>28</sub>H<sub>27</sub>N<sub>3</sub>NaO<sub>4</sub>S<sup>+</sup> [M+ Na]<sup>+</sup> 524.1614, found 524.1615.

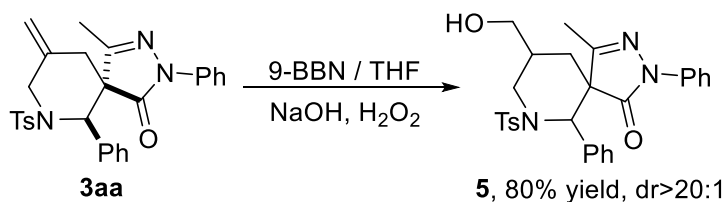

To 3 mL of 9-BBN (0.5 M in THF) solution at 0 °C under Ar atmosphere, a solution of the cycloaddition product **3aa** (0.2 M in THF, 0.1 mmol) was added dropwise. The resulting mixture was stirred at room temperature for 12 h and quenched with 2.0 mL of 2 N aqueous NaOH solution and 0.60 mL of 30% aqueous H<sub>2</sub>O<sub>2</sub> solution. After stirring for 30 min, the aqueous layer was extracted with 15 mL portions of ether three times. The

combined organic layers were dried over  $\text{MgSO}_4$  and concentrated in vacuo. The resulting residue was purified by flash chromatography on silica gel (eluting with PE:EA = 2:1–1:2) to afford a colorless liquid **5** (40.2 mg, 80% yield and >20:1 dr).  $^1\text{H}$  NMR (300 MHz,  $\text{CDCl}_3$ )  $\delta$  7.64 – 6.99 (m, 14H), 5.22 (s, 1H), 4.15 (dd,  $J$  = 13.3, 6.3 Hz, 1H), 3.74 – 3.47 (m, 3H), 2.68 – 2.19 (m, 8H), 2.15 – 1.75 (m, 2H);  $^{13}\text{C}$  NMR (75 MHz,  $\text{CDCl}_3$ )  $\delta$  171.7, 162.1, 142.8, 137.1, 135.6, 135.3, 128.8, 128.3, 127.9, 127.8, 127.7, 126.7, 124.9, 118.9, 64.2, 58.5, 56.3, 42.8, 33.2, 26.7, 21.0, 16.4; IR (film)  $\nu_{\text{max}}$  3502, 3063, 2925, 2359, 1709, 1596, 1499, 1456, 1396, 1366, 1337, 1286, 1186, 1160, 1131, 1087, 1020, 1003, 924, 879, 834, 758, 734, 698  $\text{cm}^{-1}$ ; HRMS (ESI) calcd for  $\text{C}_{28}\text{H}_{29}\text{N}_3\text{NaO}_4\text{S}^+$   $[\text{M}+\text{Na}]^+$  526.1771, found 526.1771.

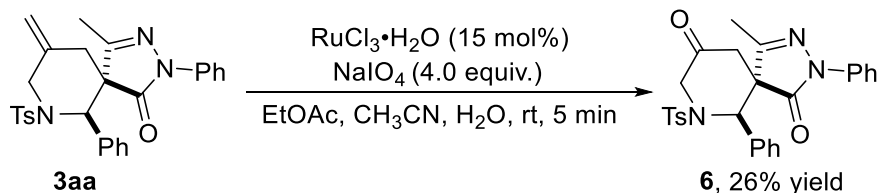

A solution of  $\text{NaIO}_4$  (85mg, 0.4 mmol) in water (0.6 mL) was added to a solution of  $\text{RuCl}_3 \cdot \text{H}_2\text{O}$  (3.1mg, 15 mol%) in MeCN (0.8 mL). This mixture was stirred 2 minutes and then a solution of the **3aa** (0.1 mmol) in EA (0.8 mL) was added. The mixture was stirred for 10 minutes until TLC indicates complete consumption of the starting material.  $\text{MgSO}_4$  was added and the resulting heterogeneous mixture was washed with EA, and finally evaporated under reduced pressure. Purified by flash chromatography on silica gel with PE/EA (8:1) as the solvent give a white solid **6** (12.7 mg, 26% yield). mp = 172 – 175  $^\circ\text{C}$ ;  $^1\text{H}$  NMR (300 MHz,  $\text{CDCl}_3$ )  $\delta$  7.73 – 6.97 (m, 14H), 5.65 (s, 1H), 4.87 – 4.47 (m, 2H), 2.54 (d,  $J$  = 16.0 Hz, 1H), 2.45 (s, 3H), 2.40 (s, 3H), 2.26 (d,  $J$  = 15.9 Hz, 1H);  $^{13}\text{C}$  NMR (126 MHz,  $\text{CDCl}_3$ )  $\delta$  202.5, 171.8, 157.7, 144.4, 136.5, 136.0, 135.9, 129.9, 128.7, 128.6, 128.5, 127.1, 125.8, 125.5, 119.4, 58.5, 57.9, 53.2, 40.3, 21.5, 13.9; IR (film)  $\nu_{\text{max}}$  2926, 1746, 1704, 1597, 1500, 1457, 1356, 1306, 1265, 1164, 1092, 1040, 1003, 975, 936, 903, 807, 731, 701, 691  $\text{cm}^{-1}$ ; HRMS (ESI) calcd for  $\text{C}_{27}\text{H}_{26}\text{N}_3\text{O}_4\text{S}^+$   $[\text{M}+\text{H}]^+$  488.1639, found 488.1639

# <sup>1</sup>H and <sup>13</sup>C NMR Spectra of All Products

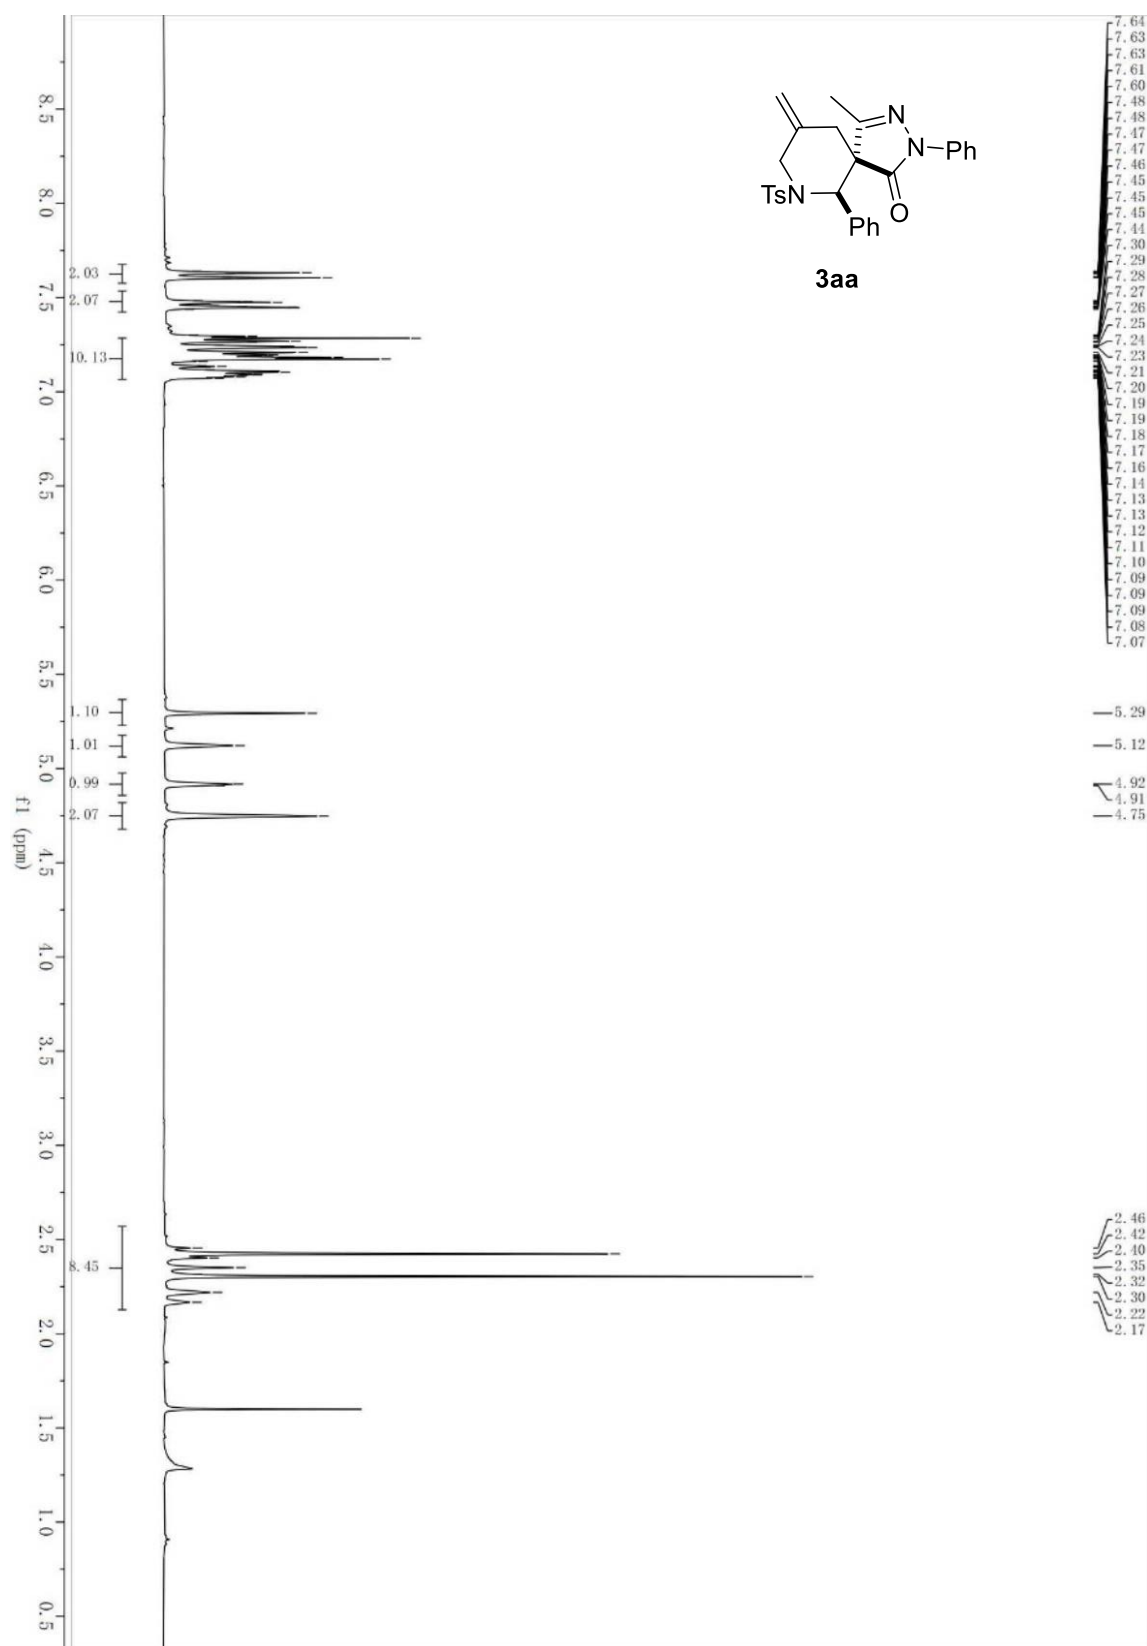

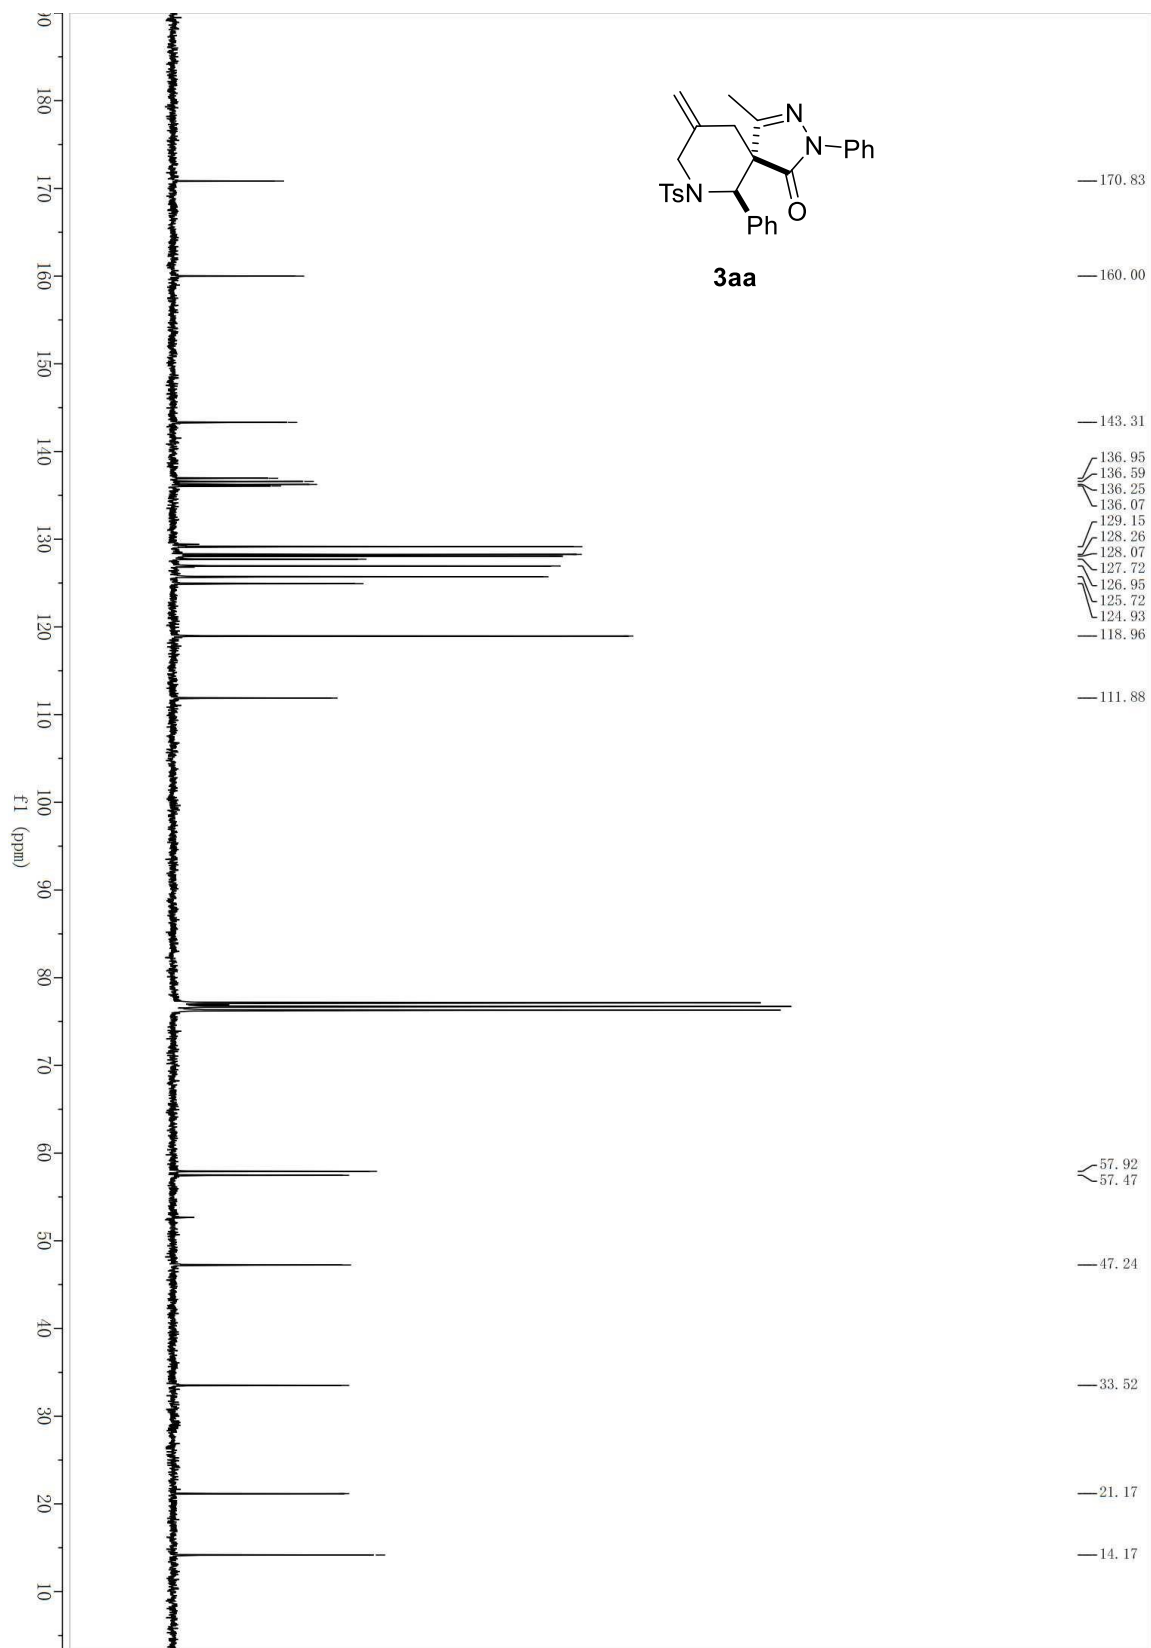

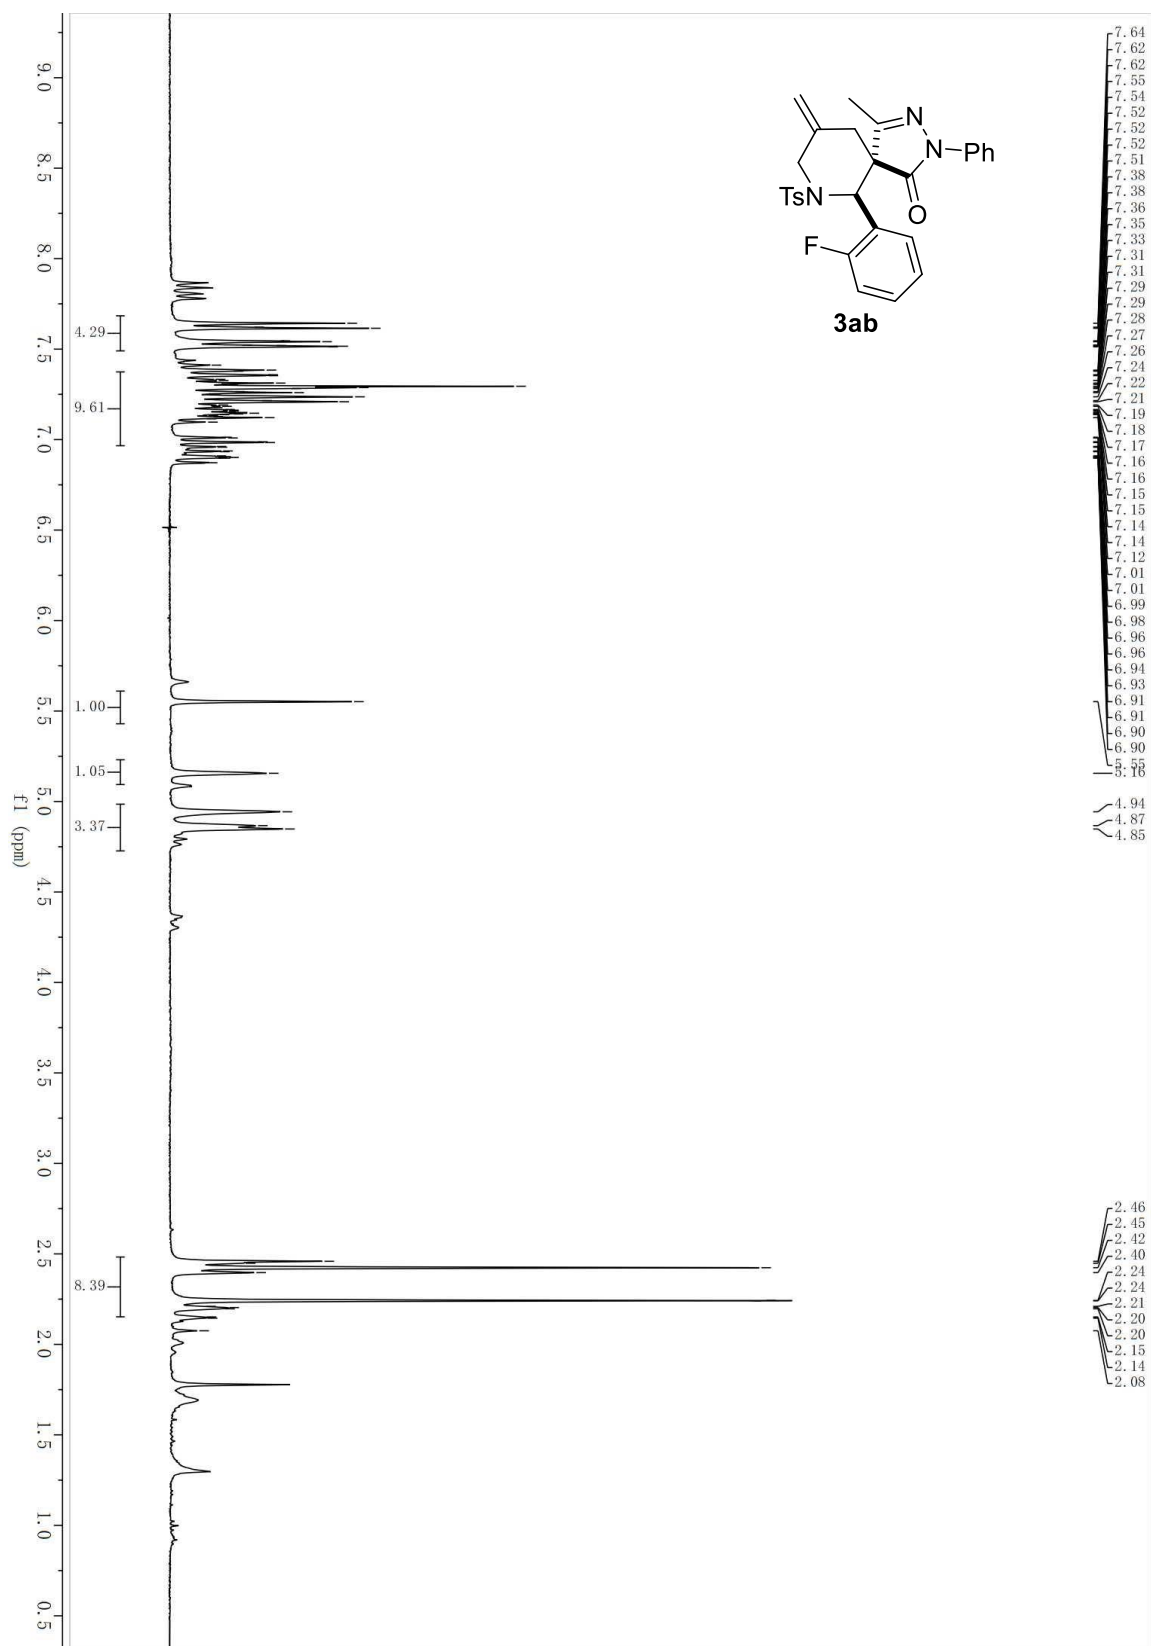

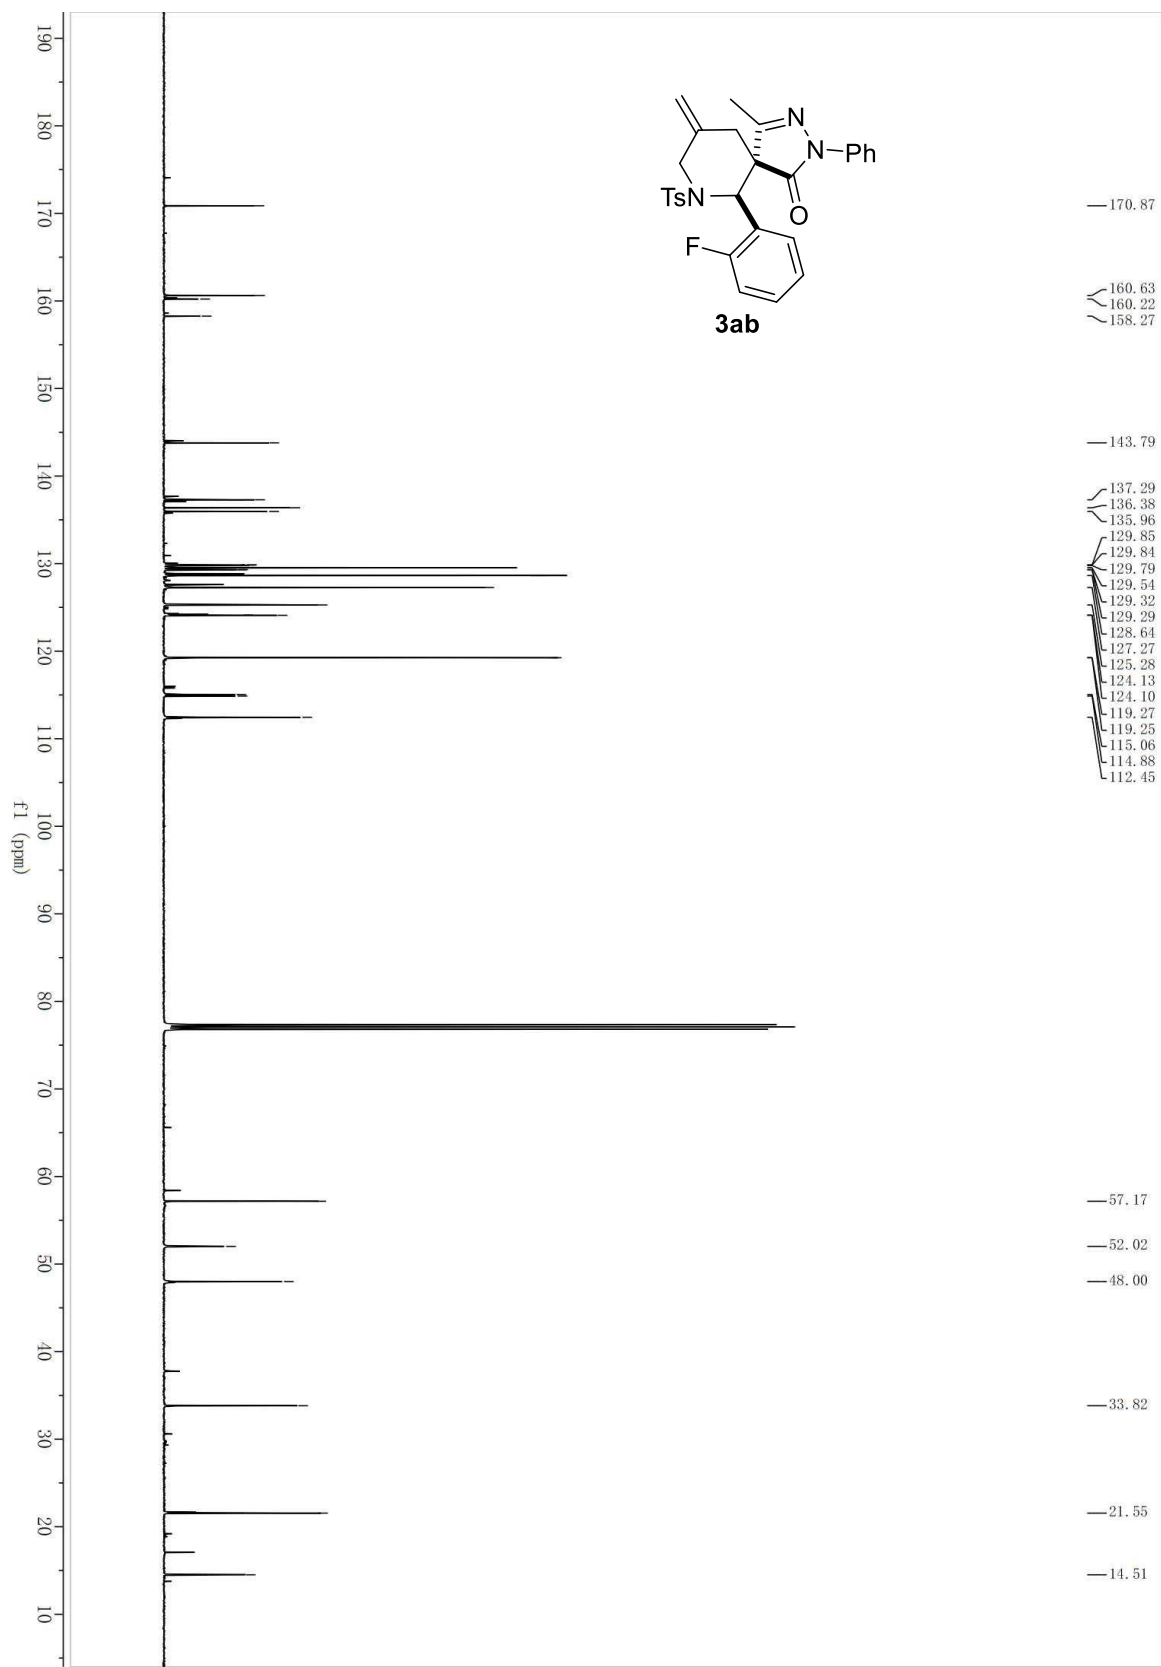

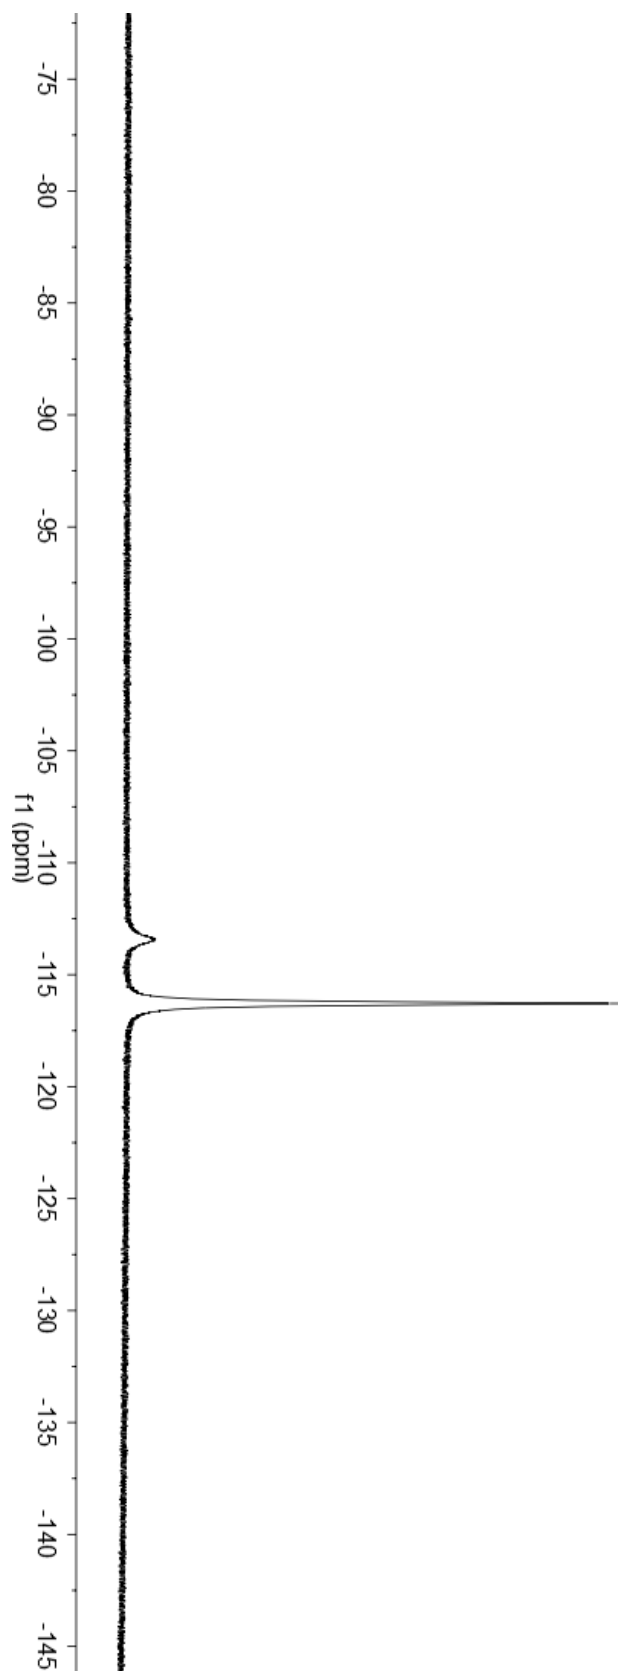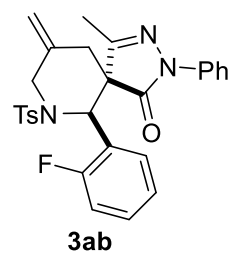

—116.29



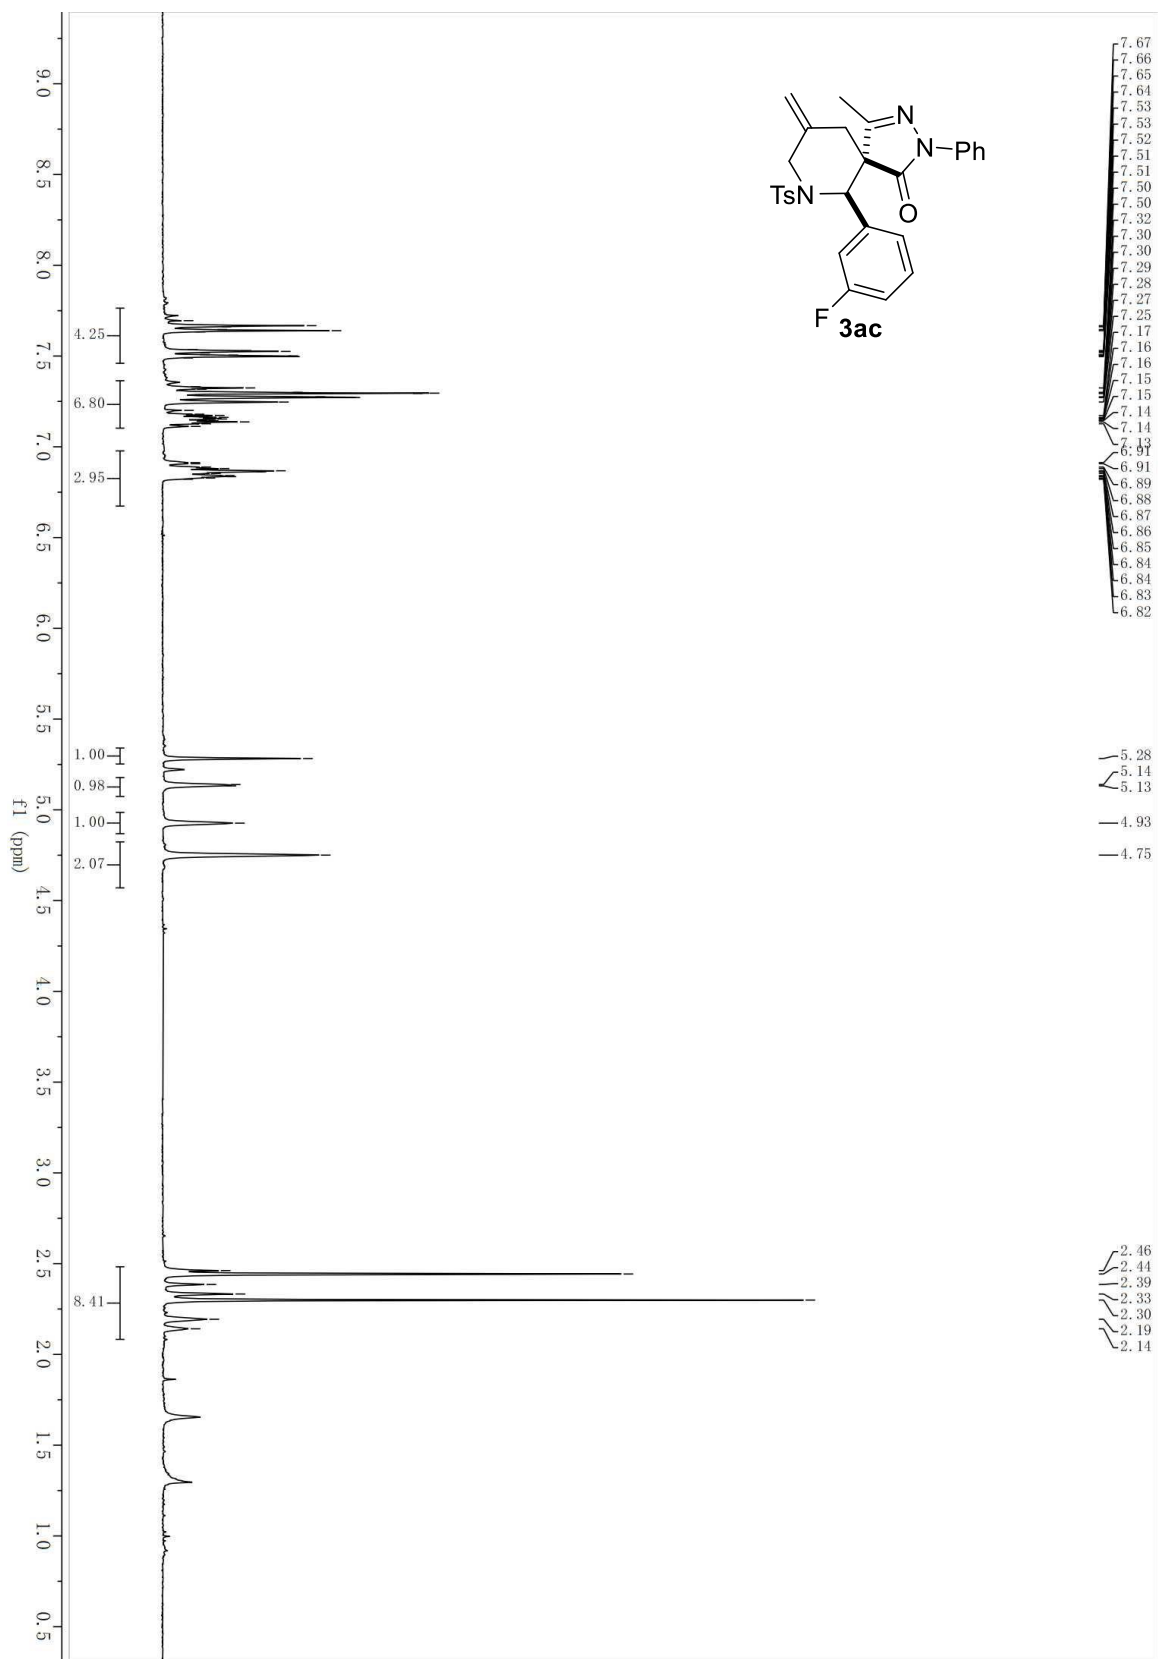

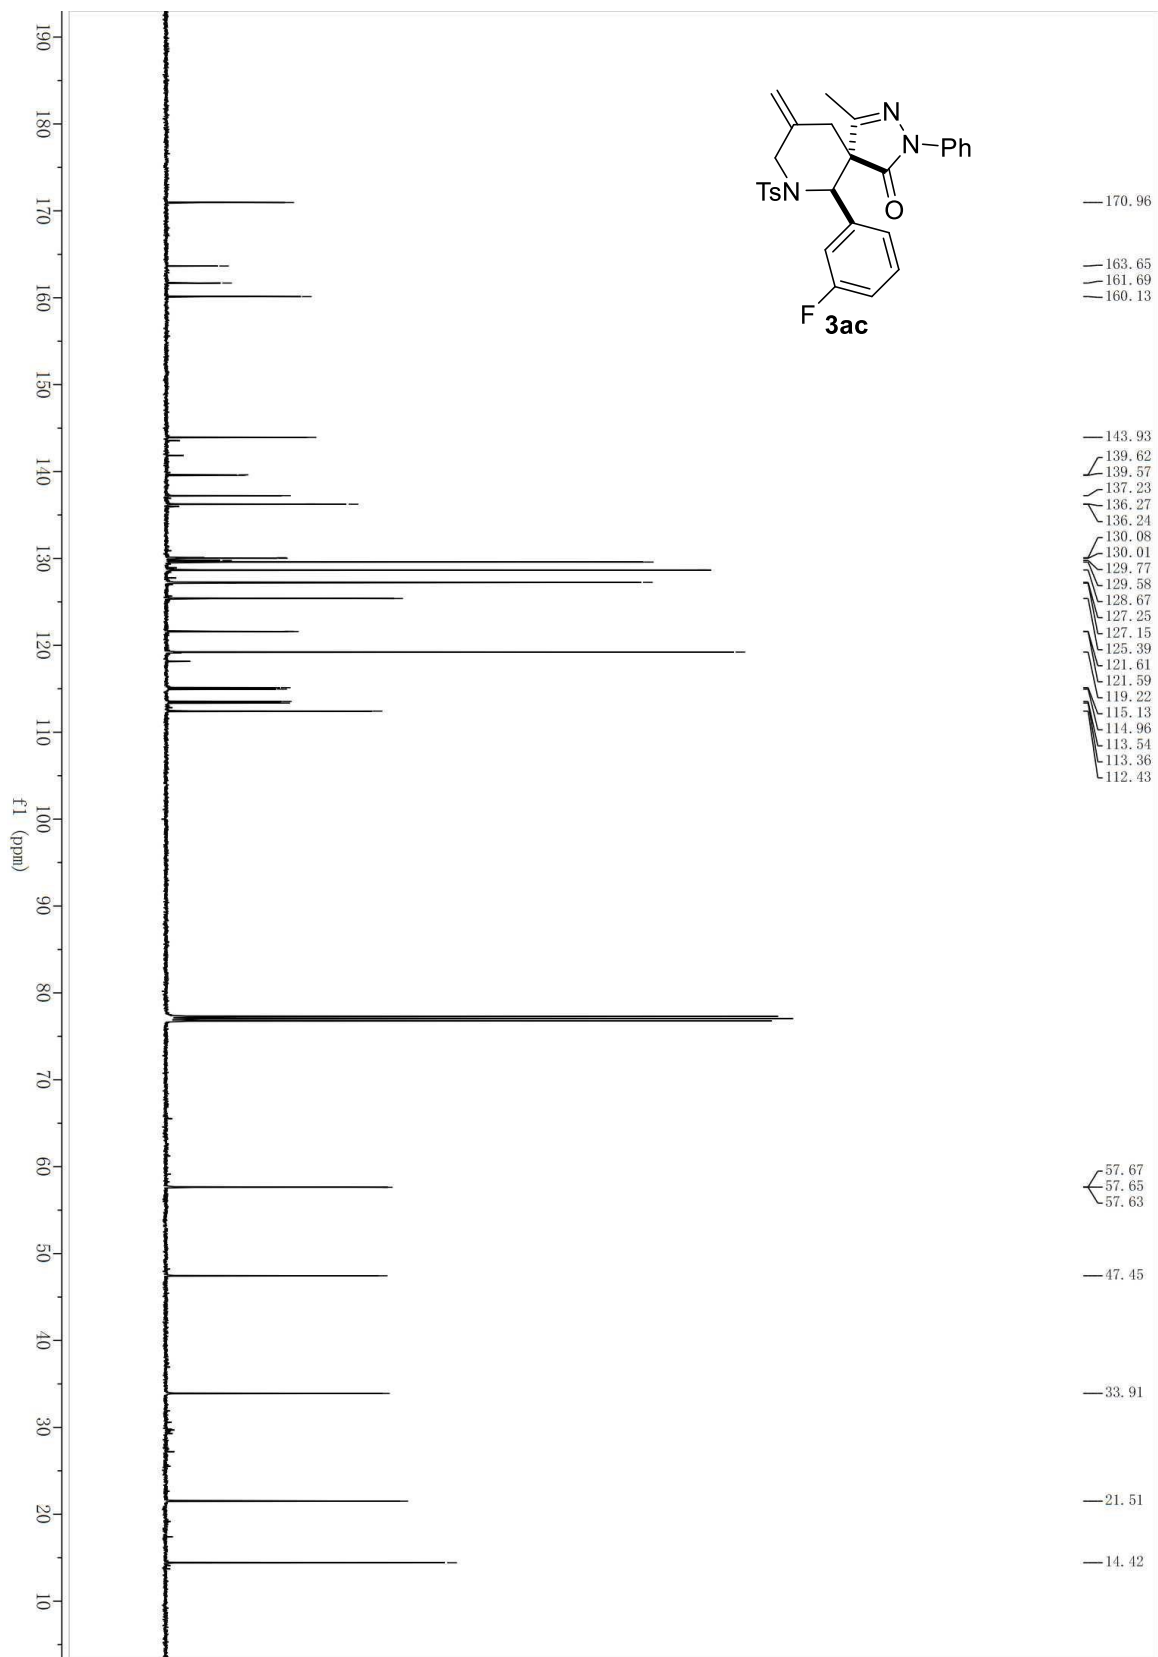

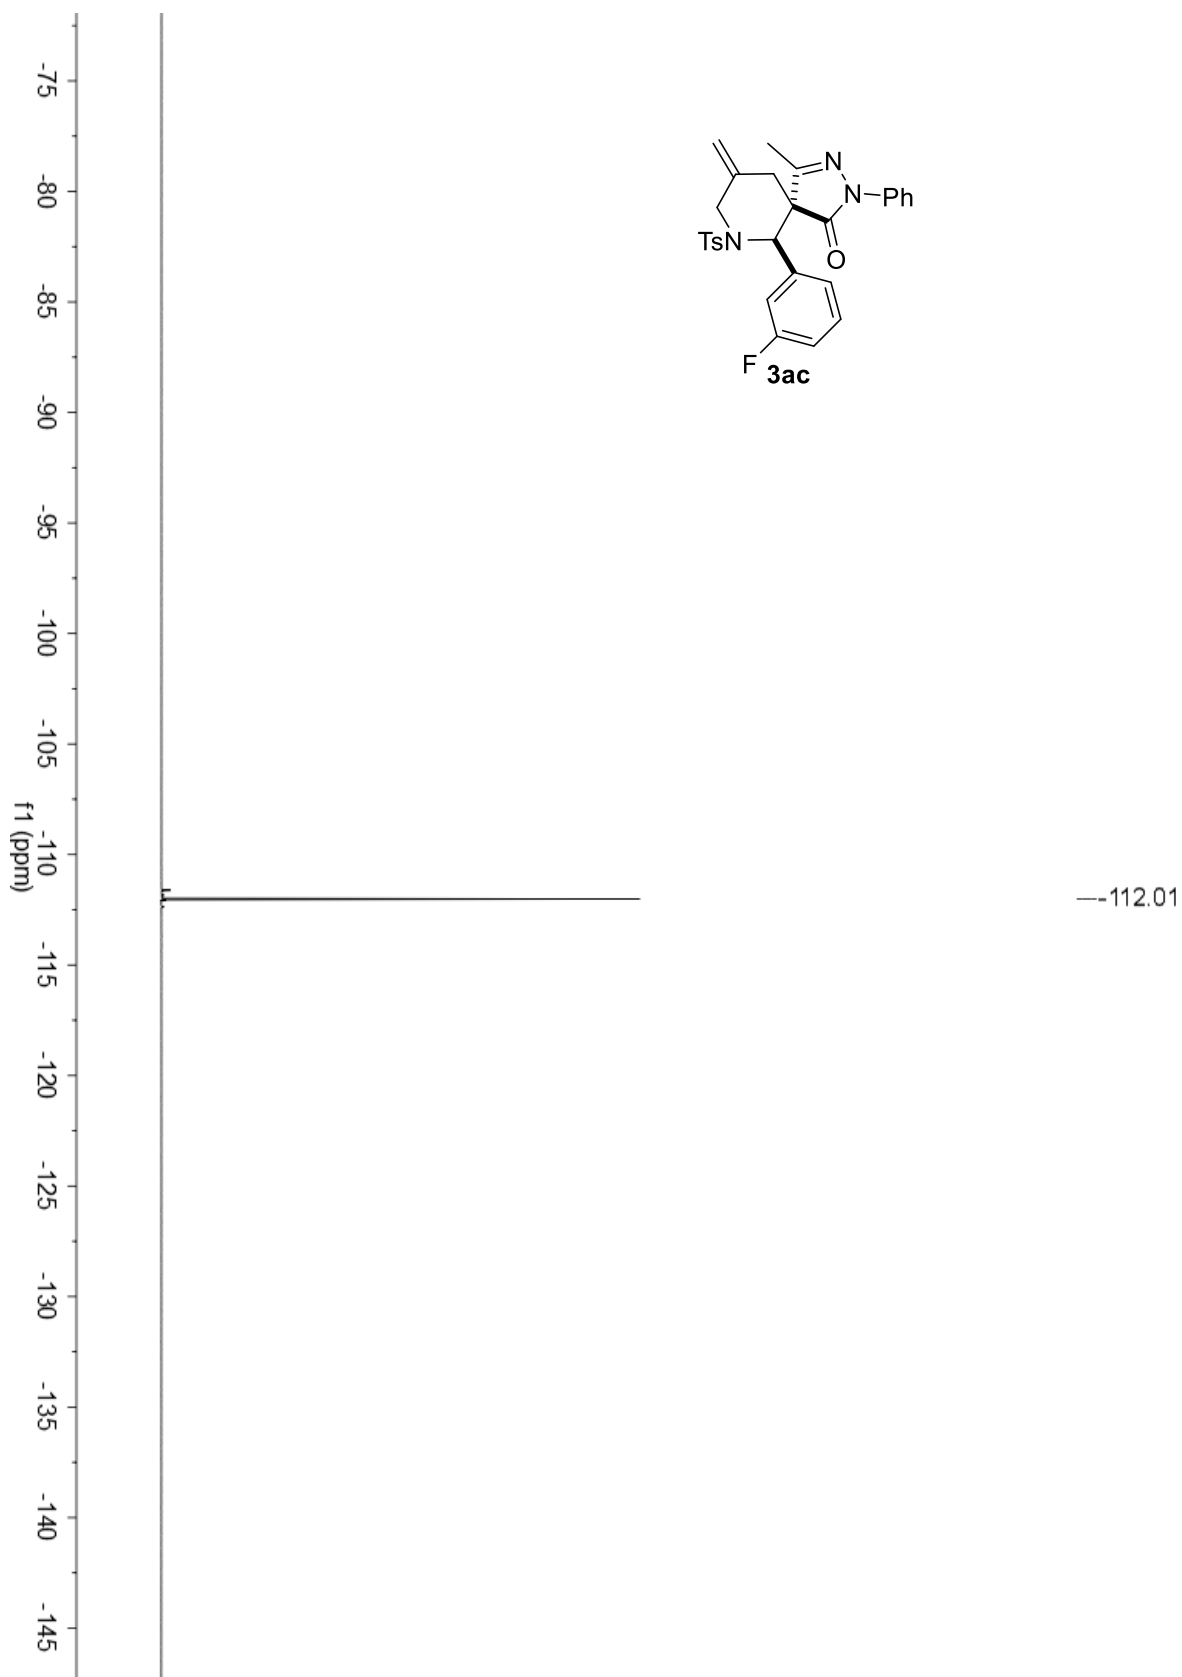

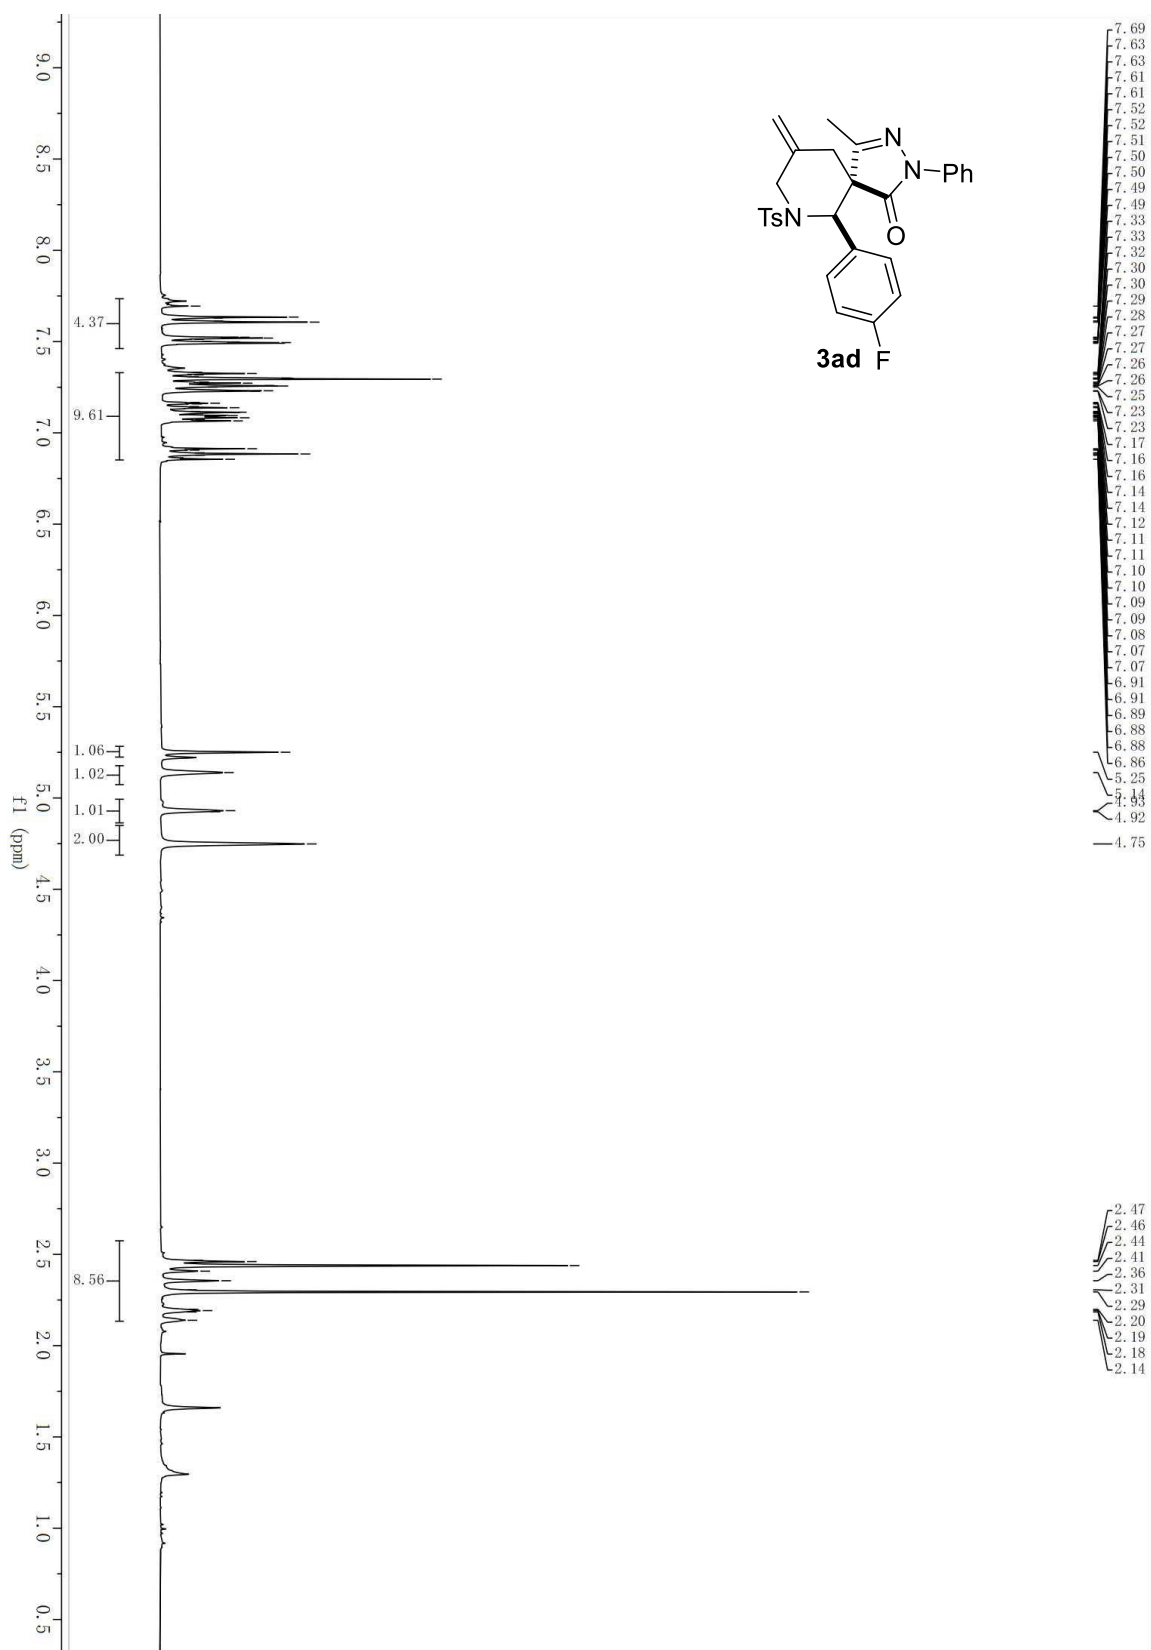

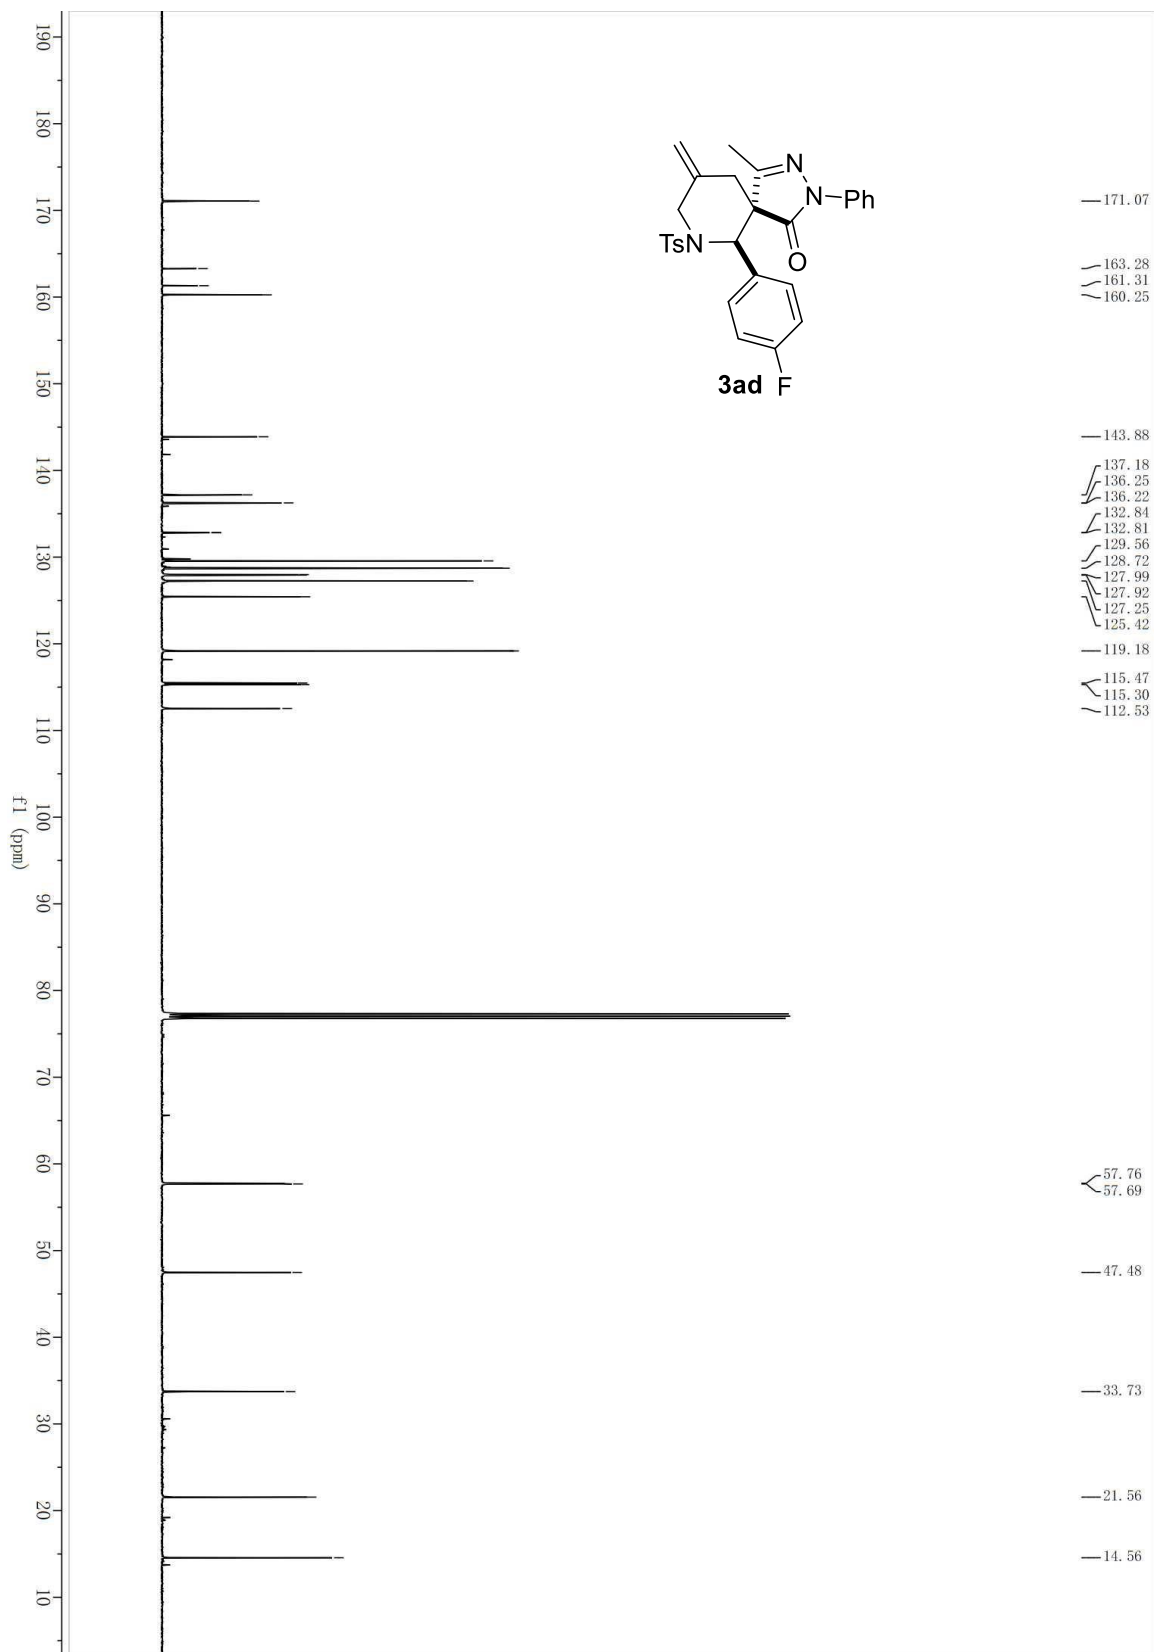

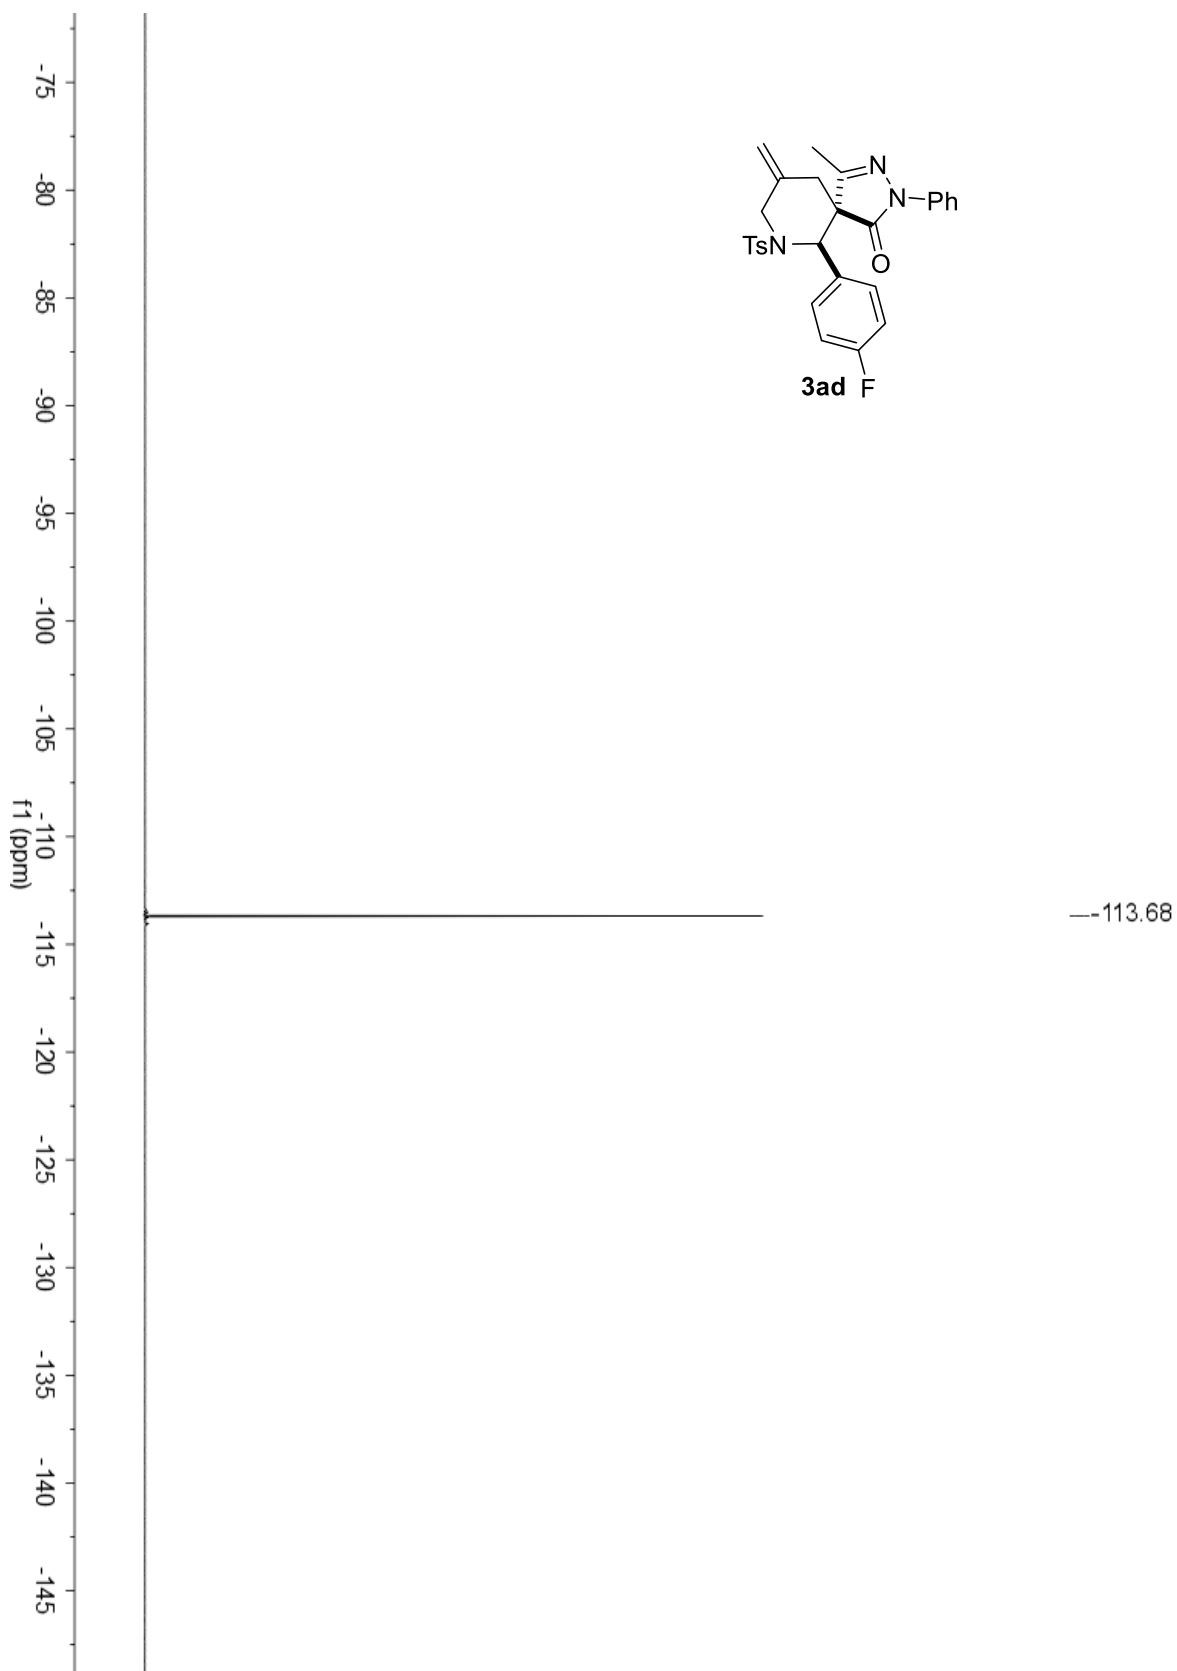

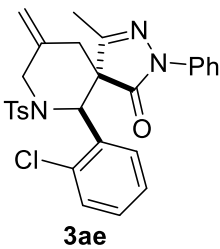

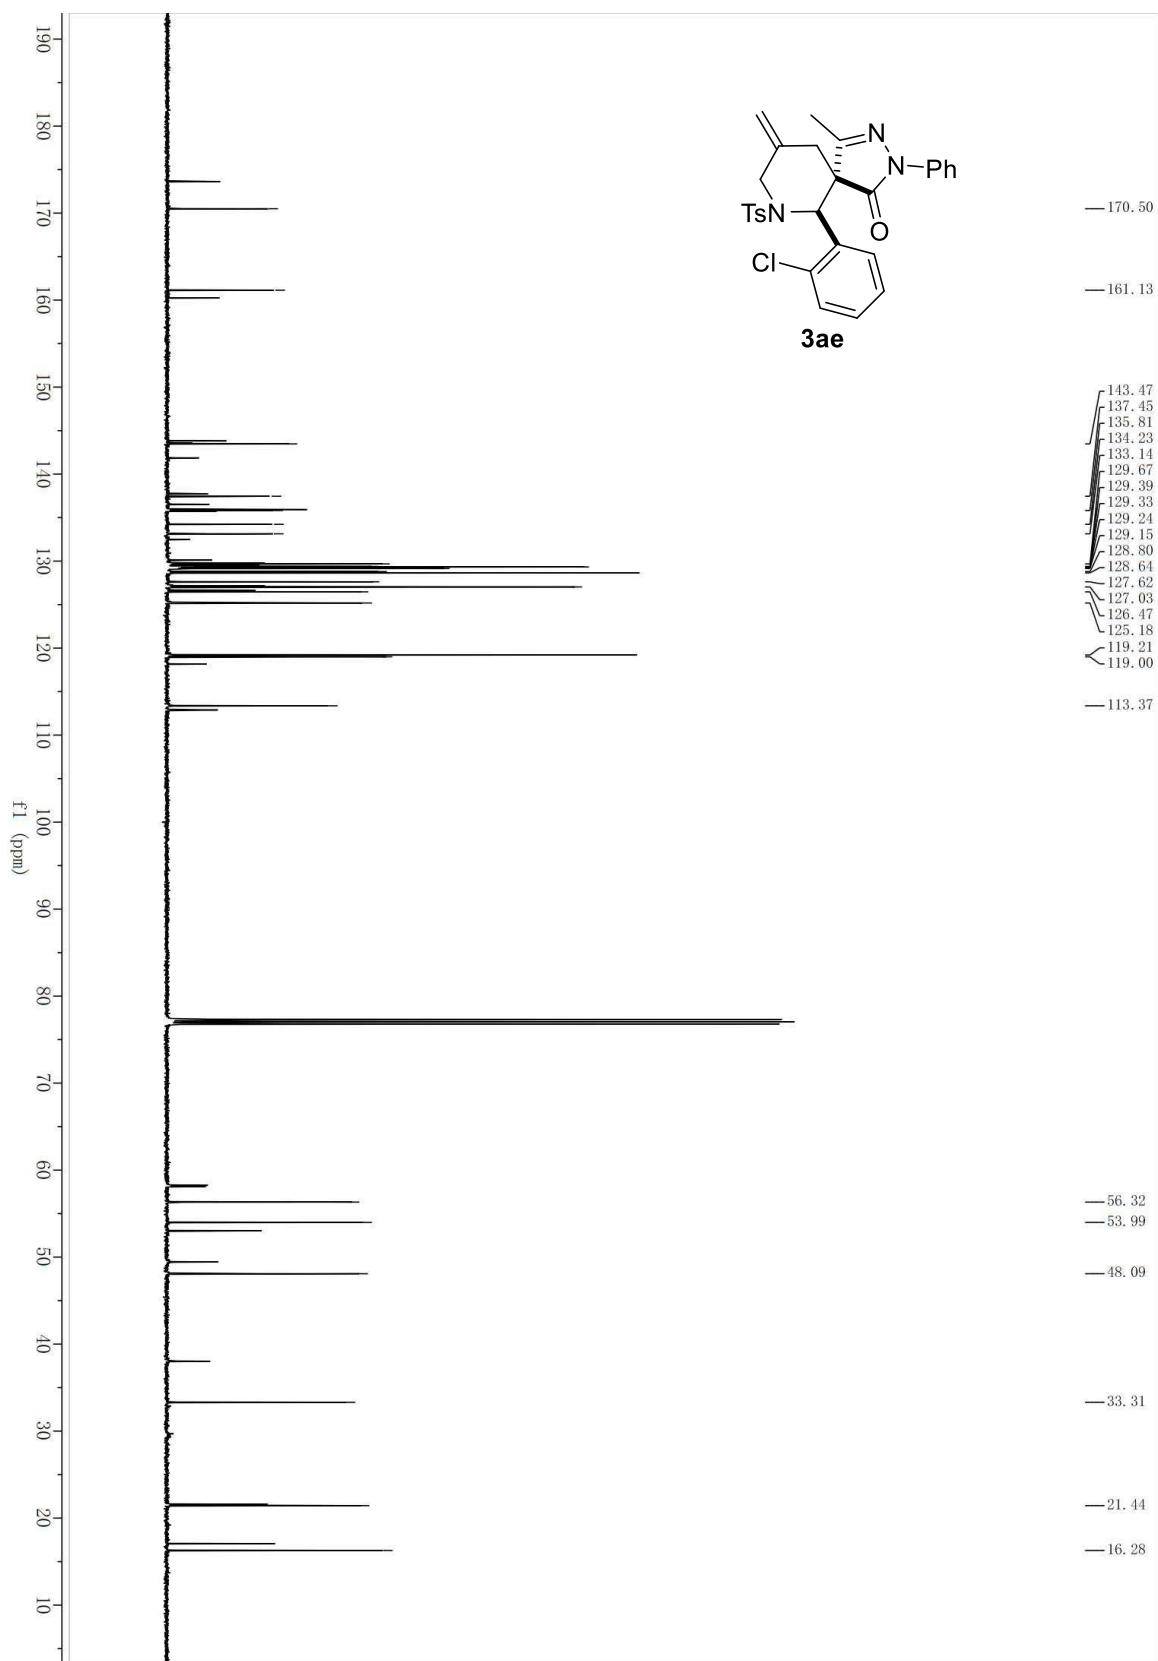



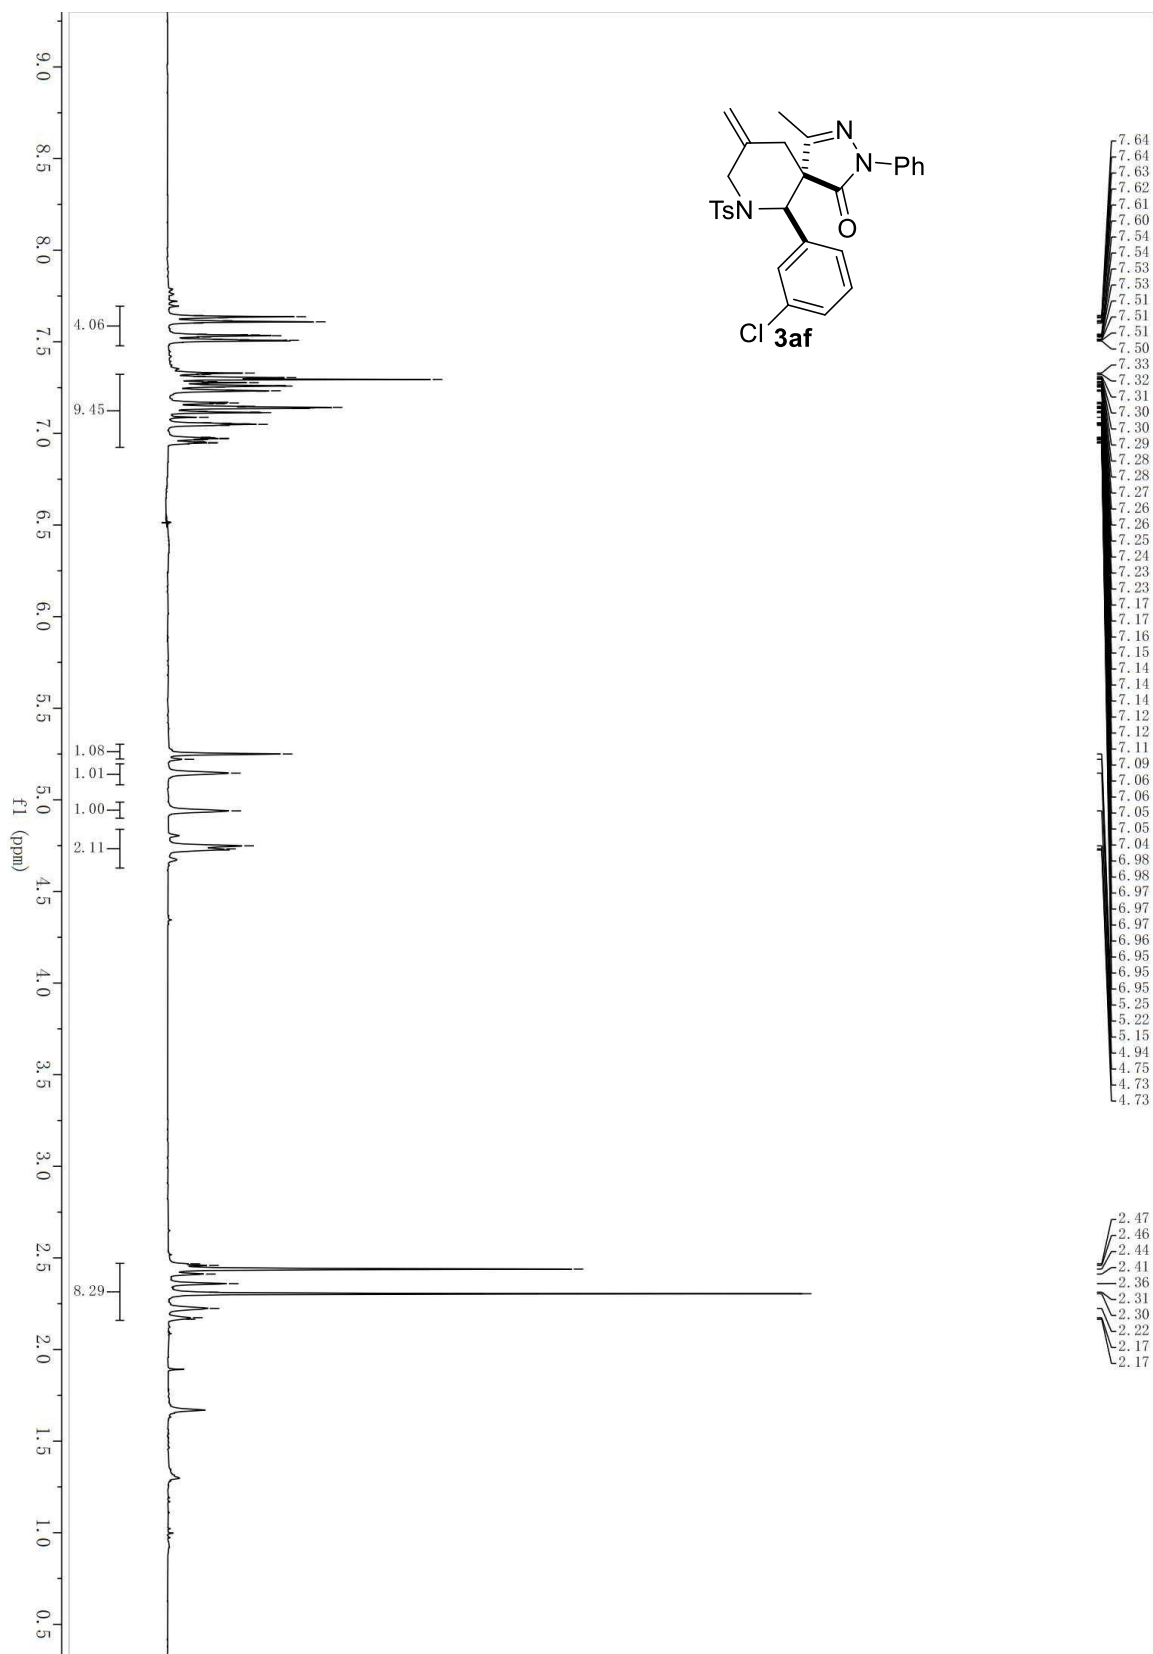

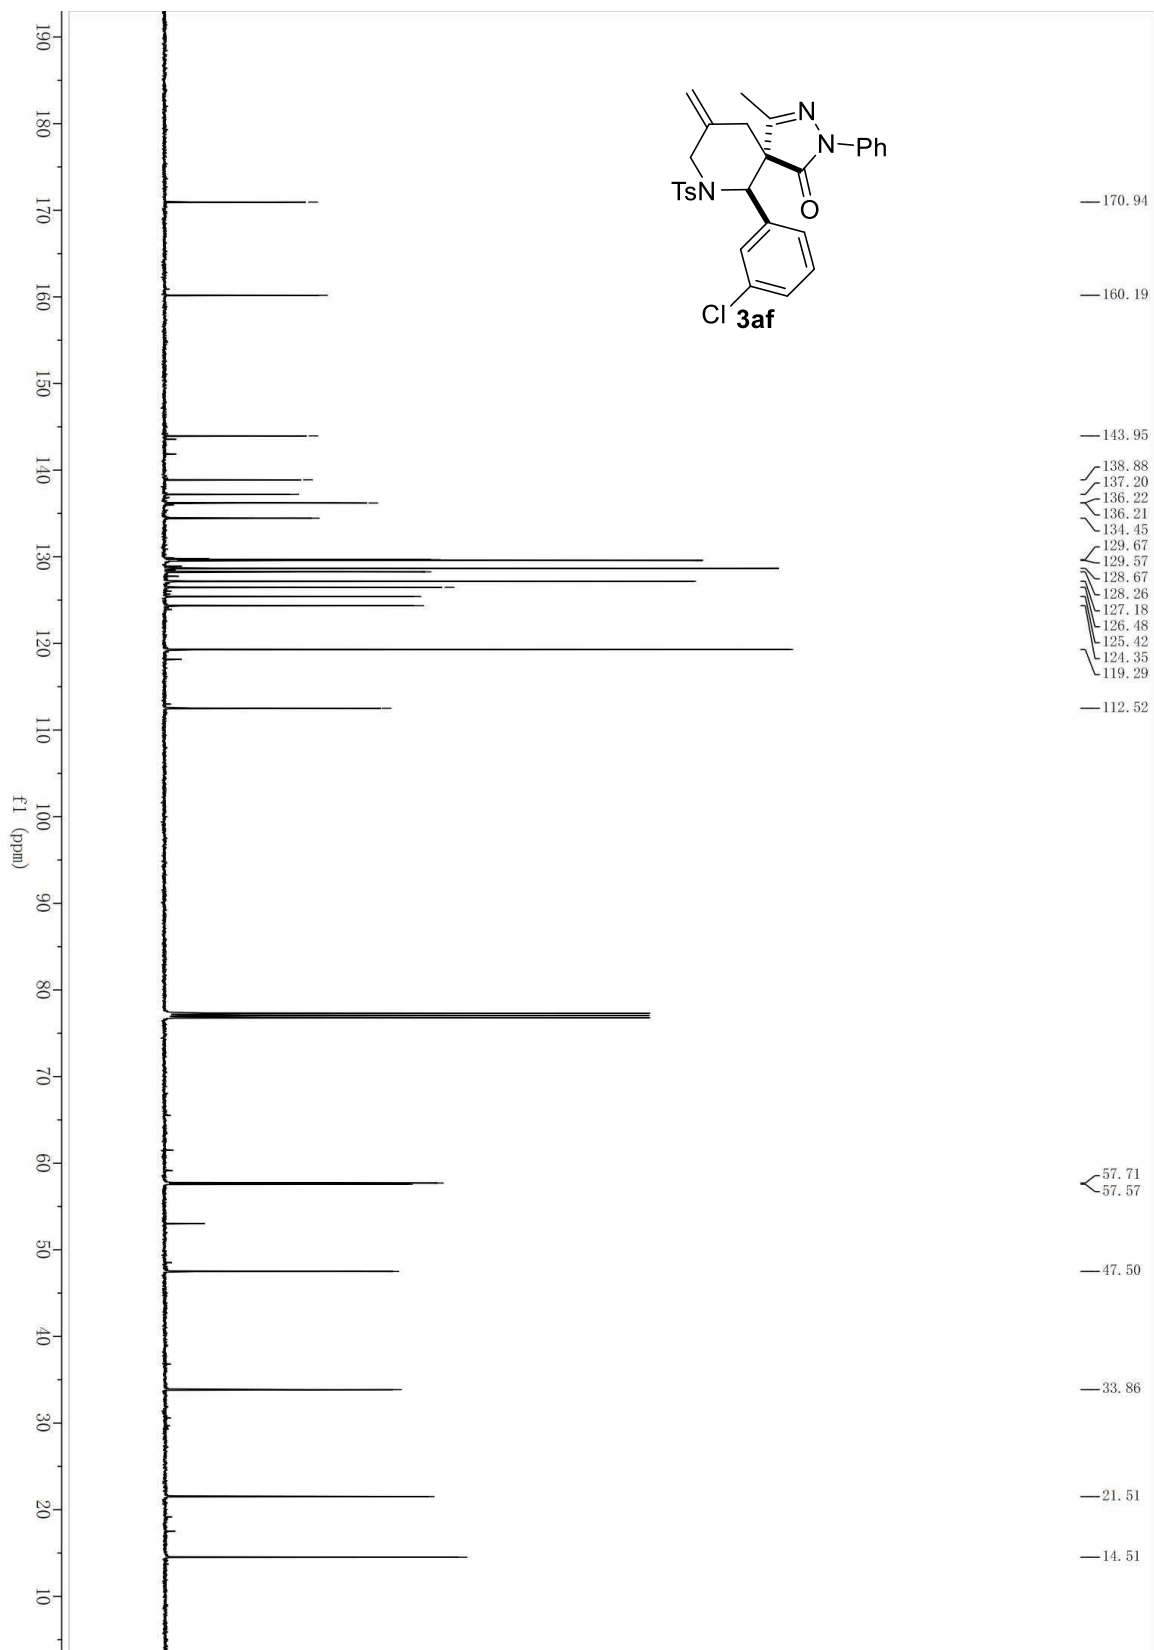

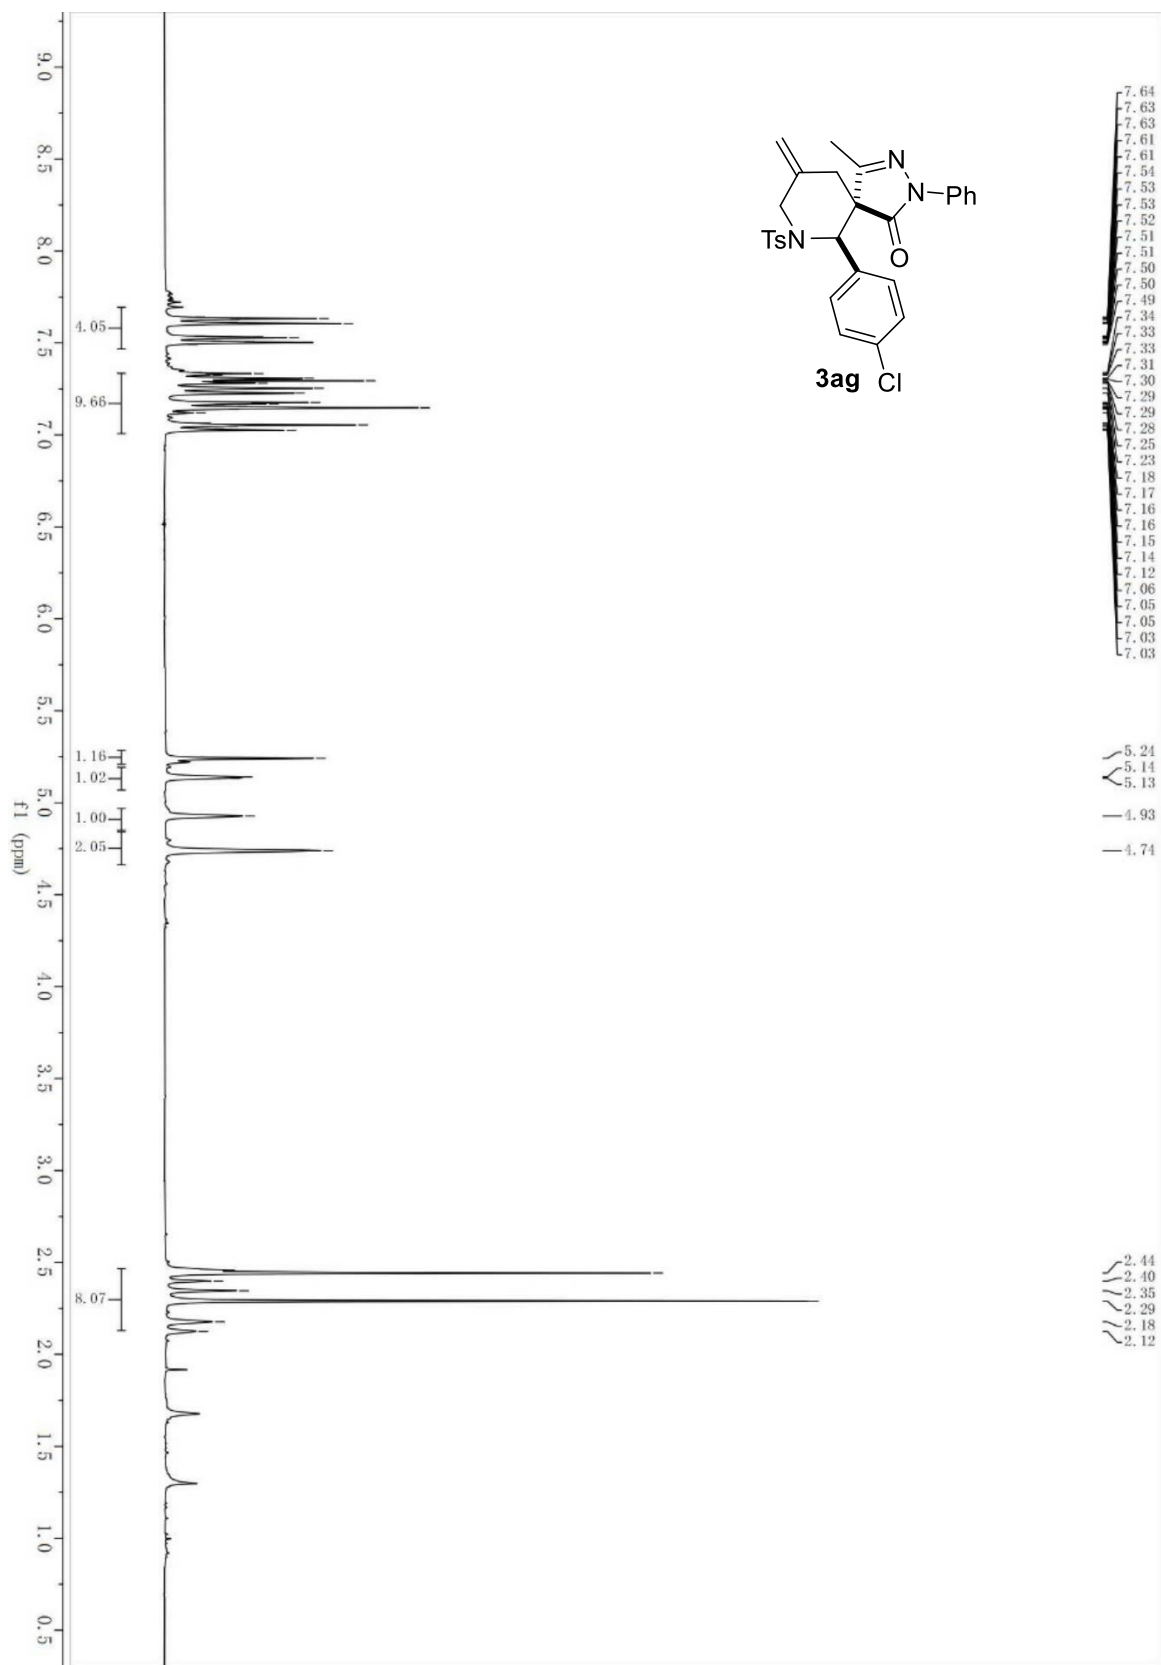

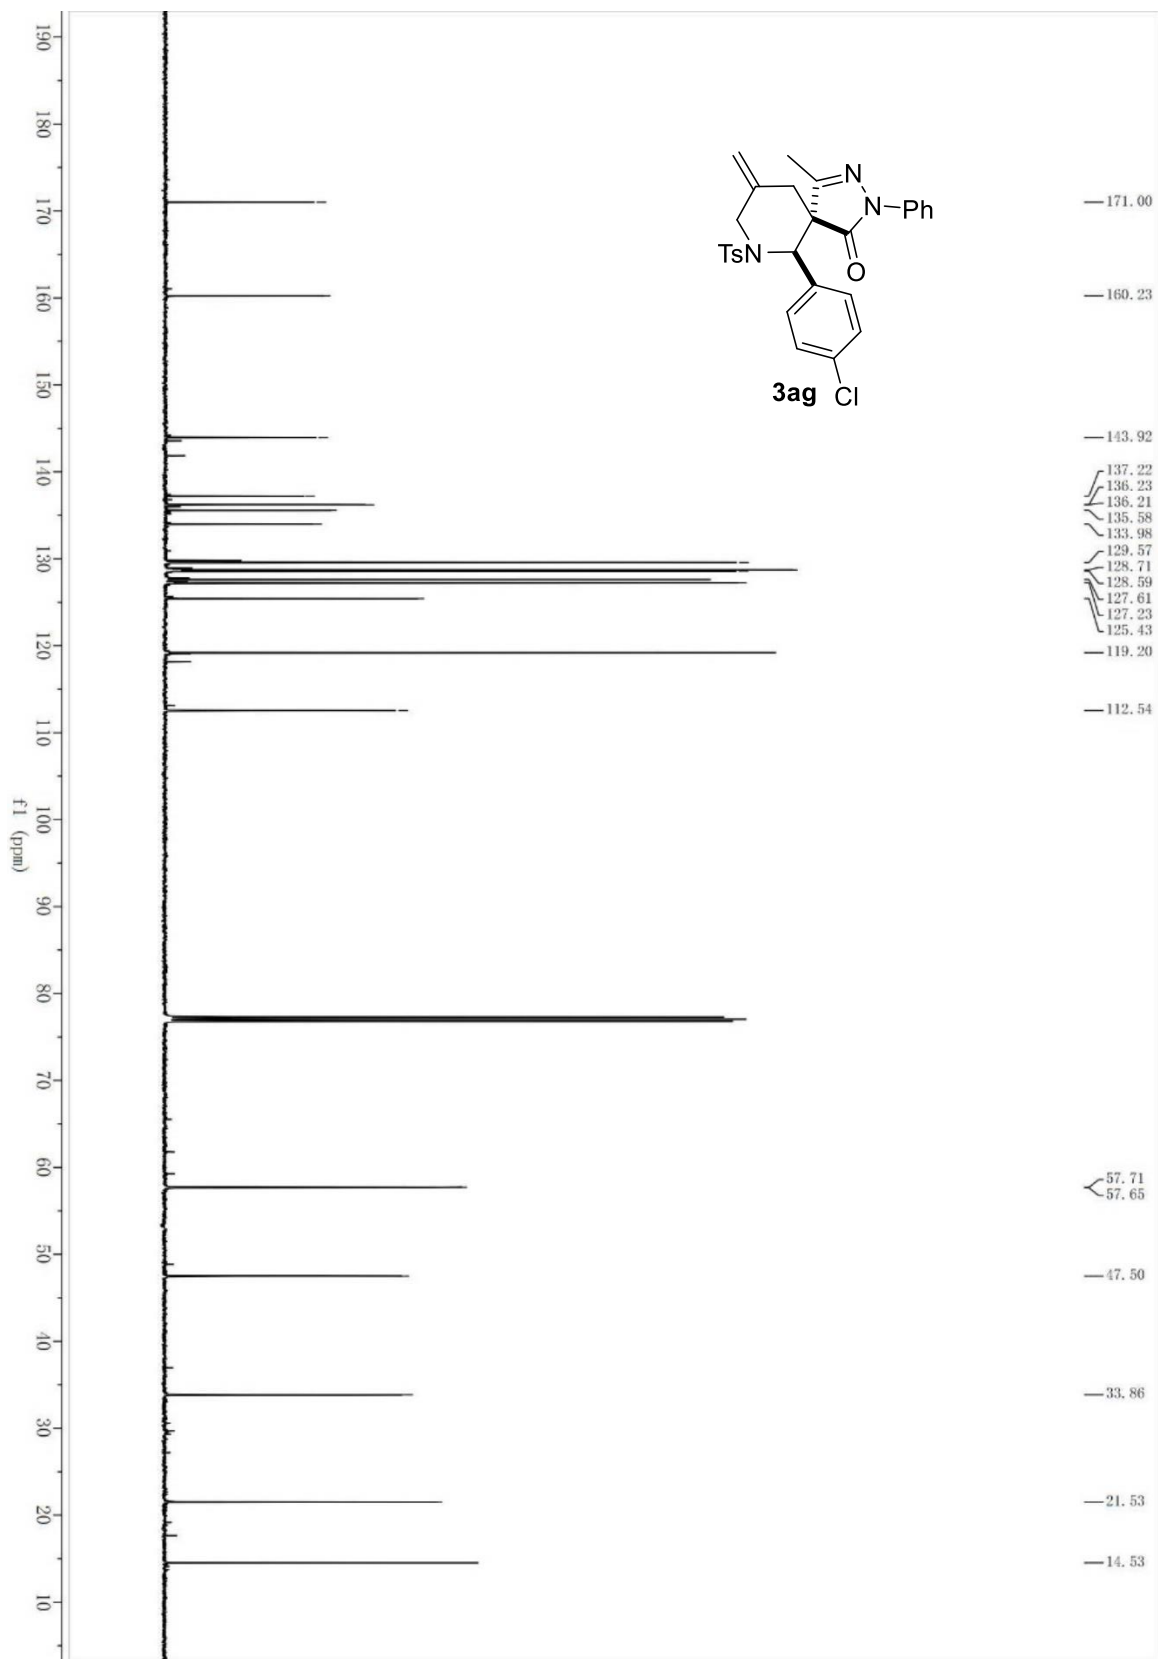

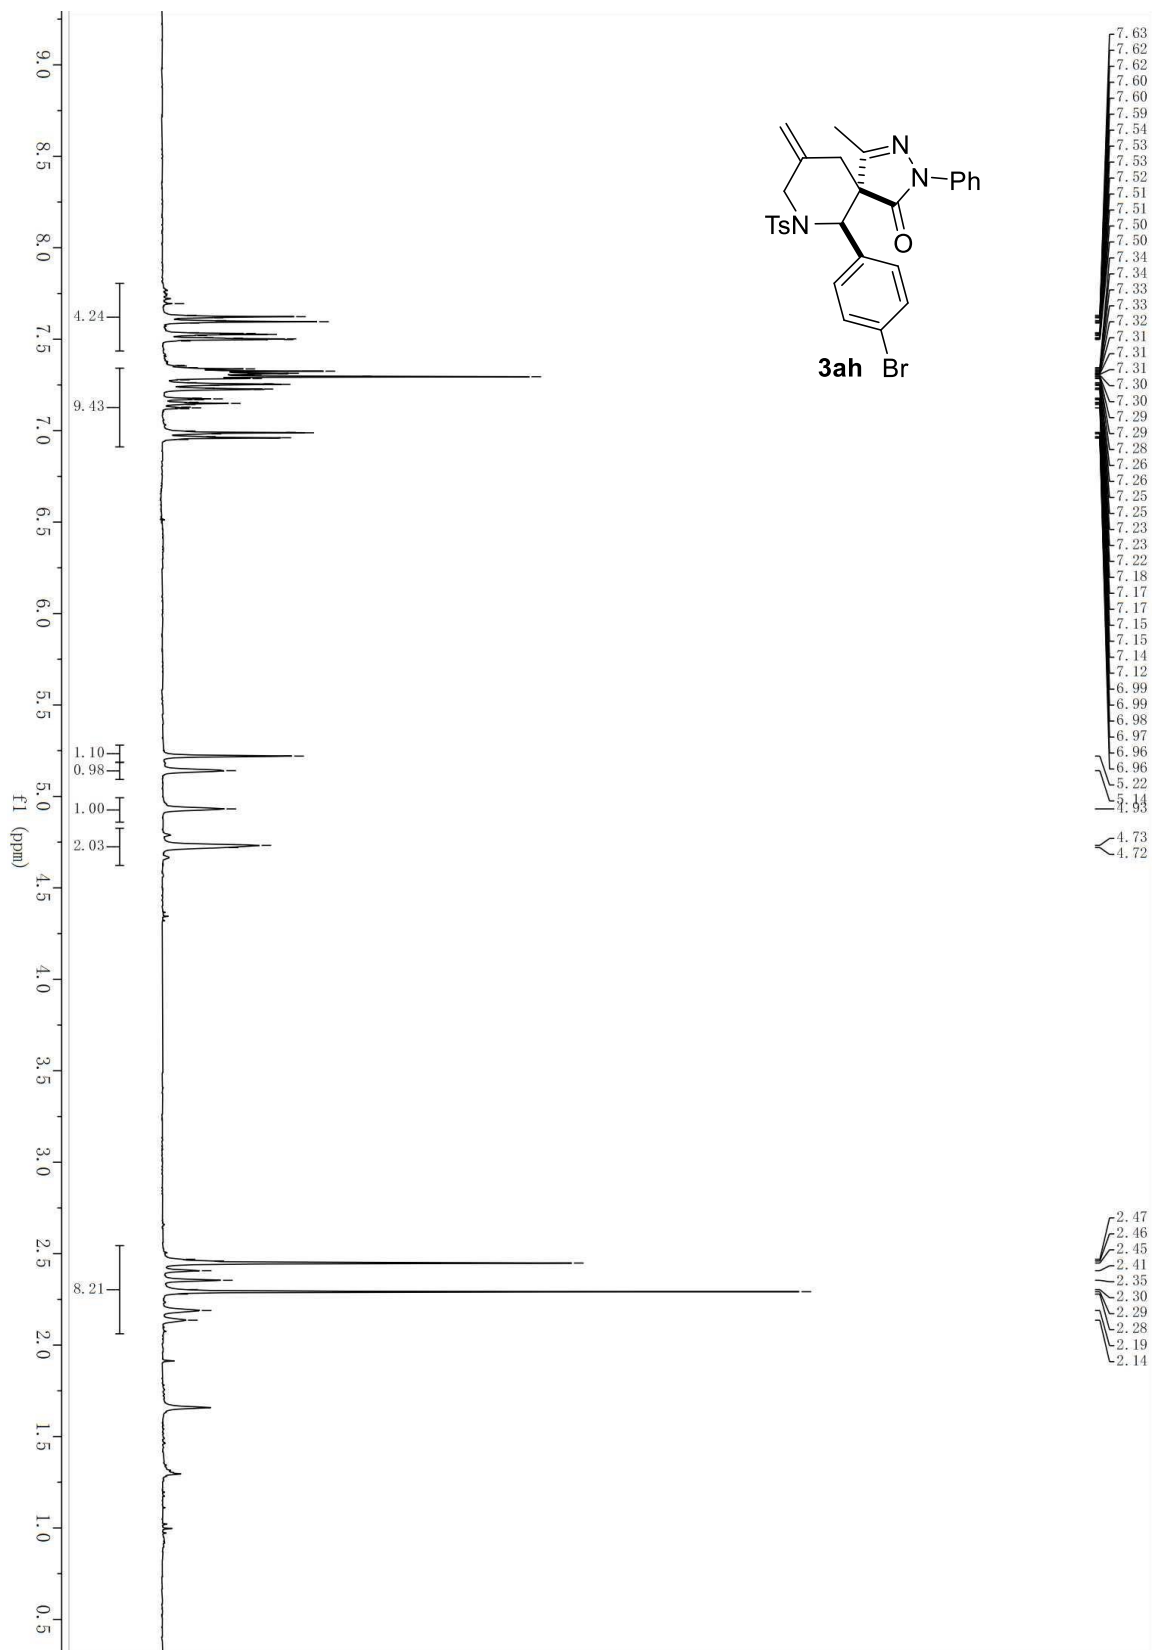

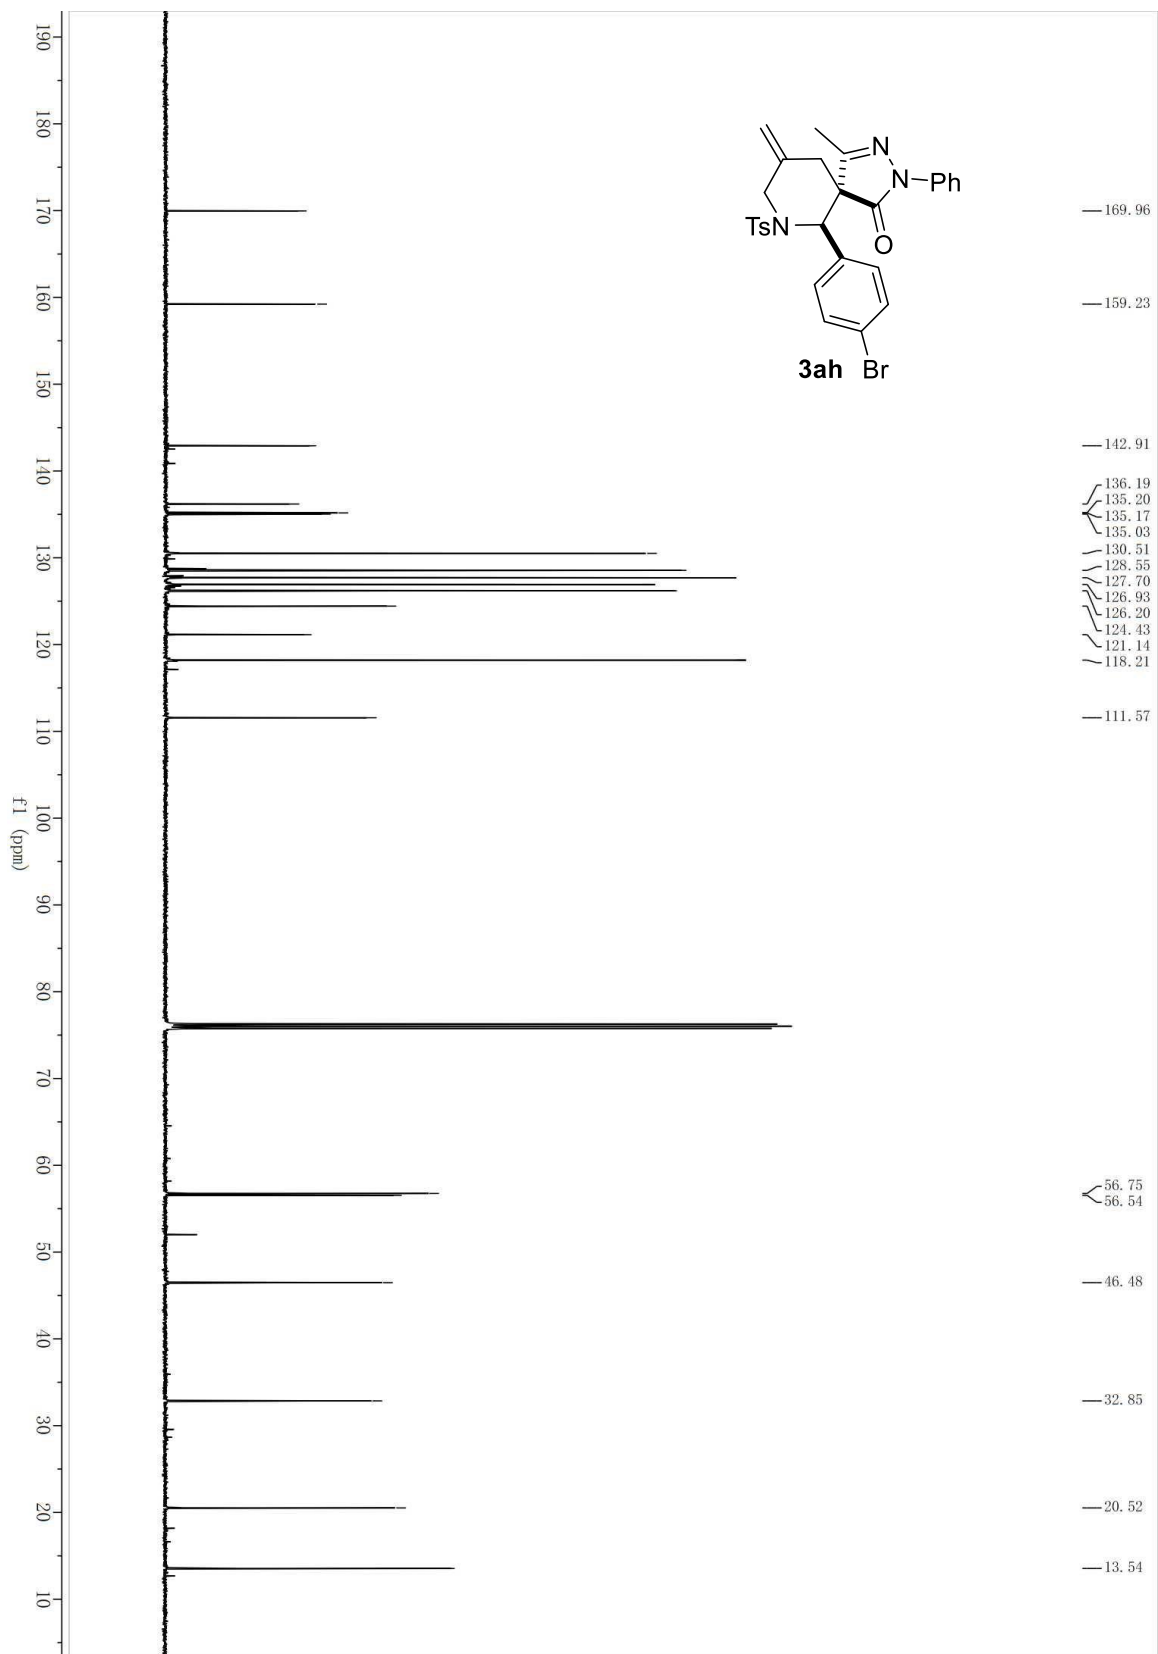

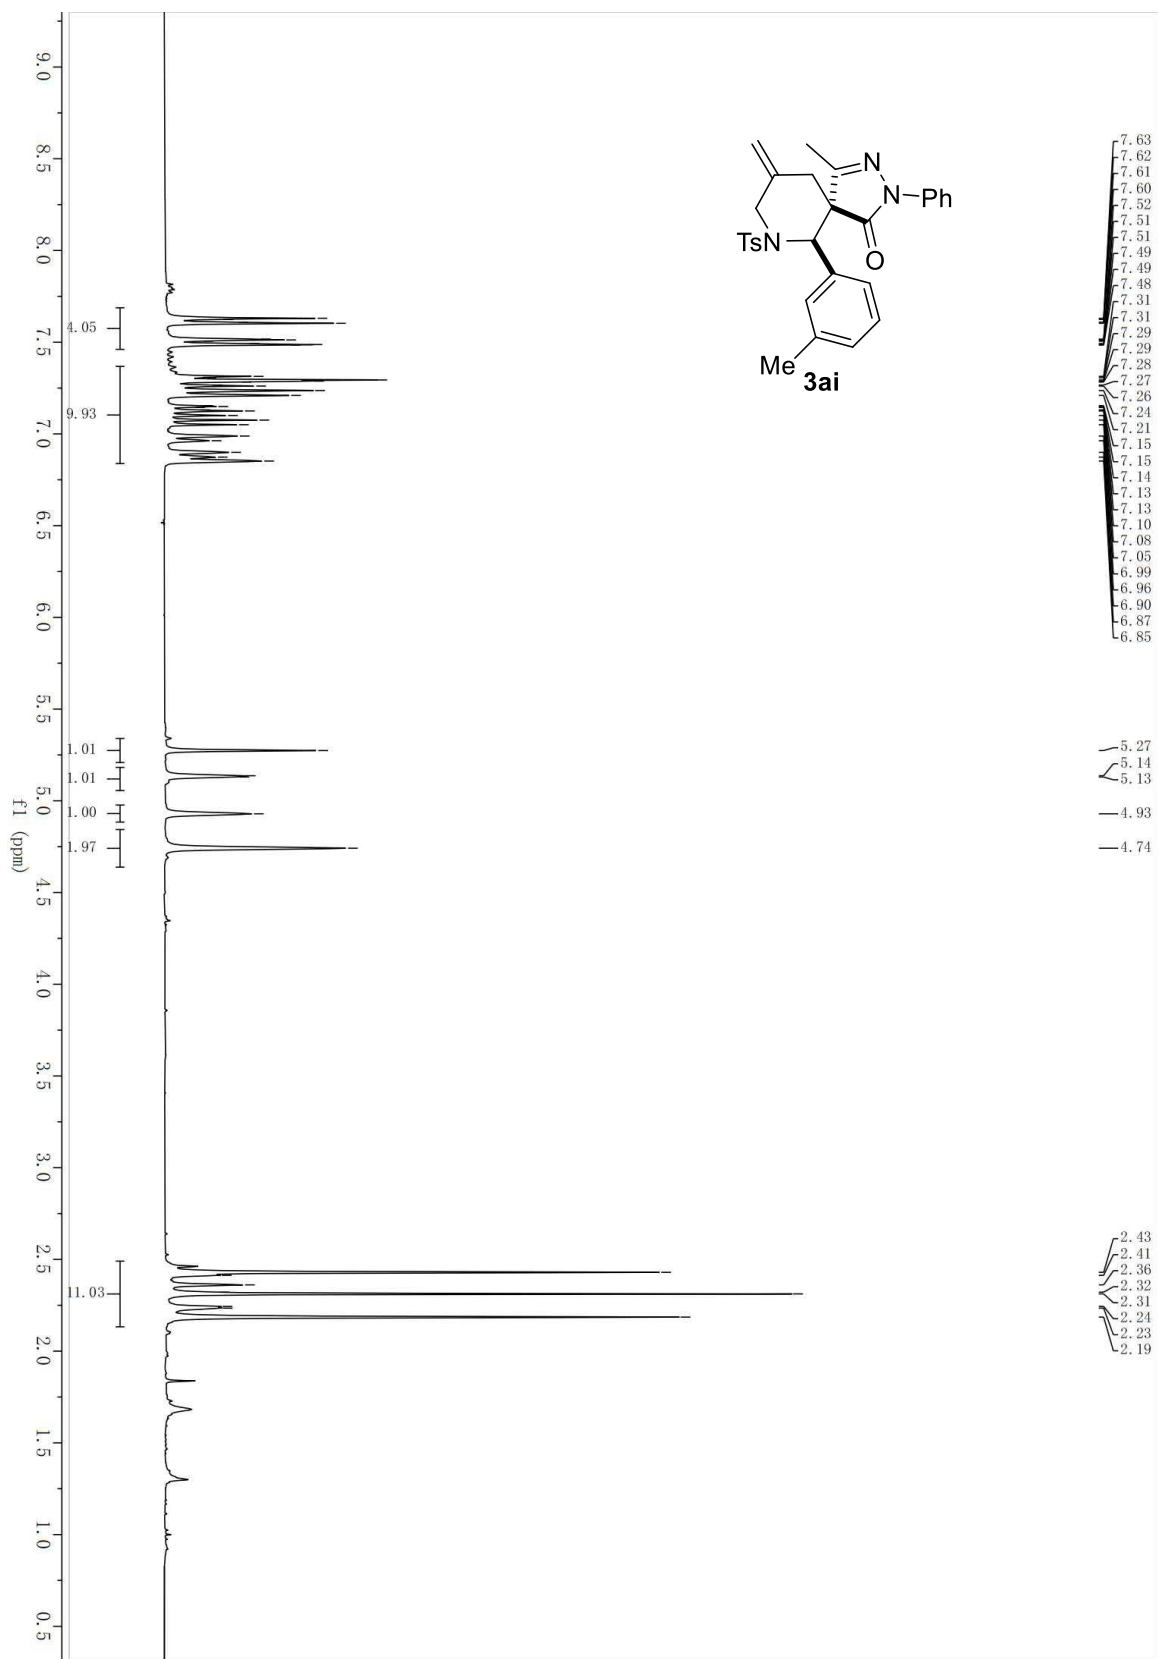

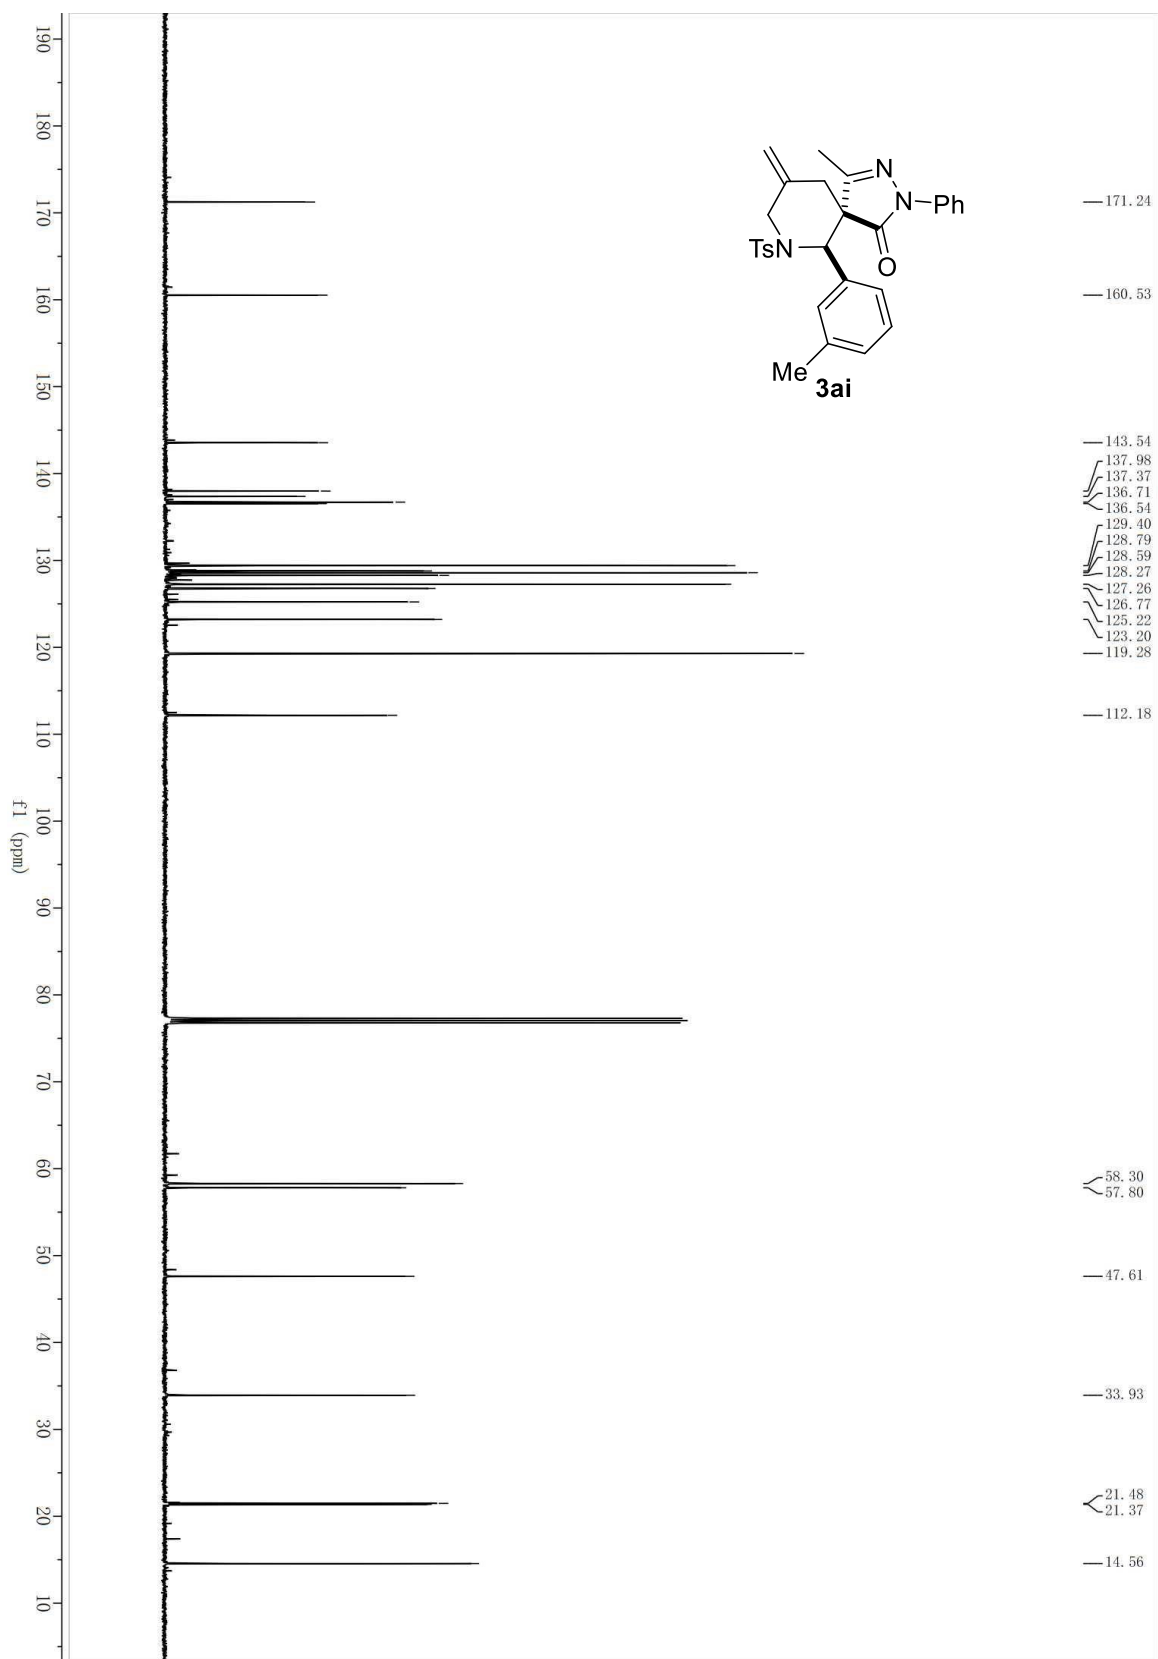



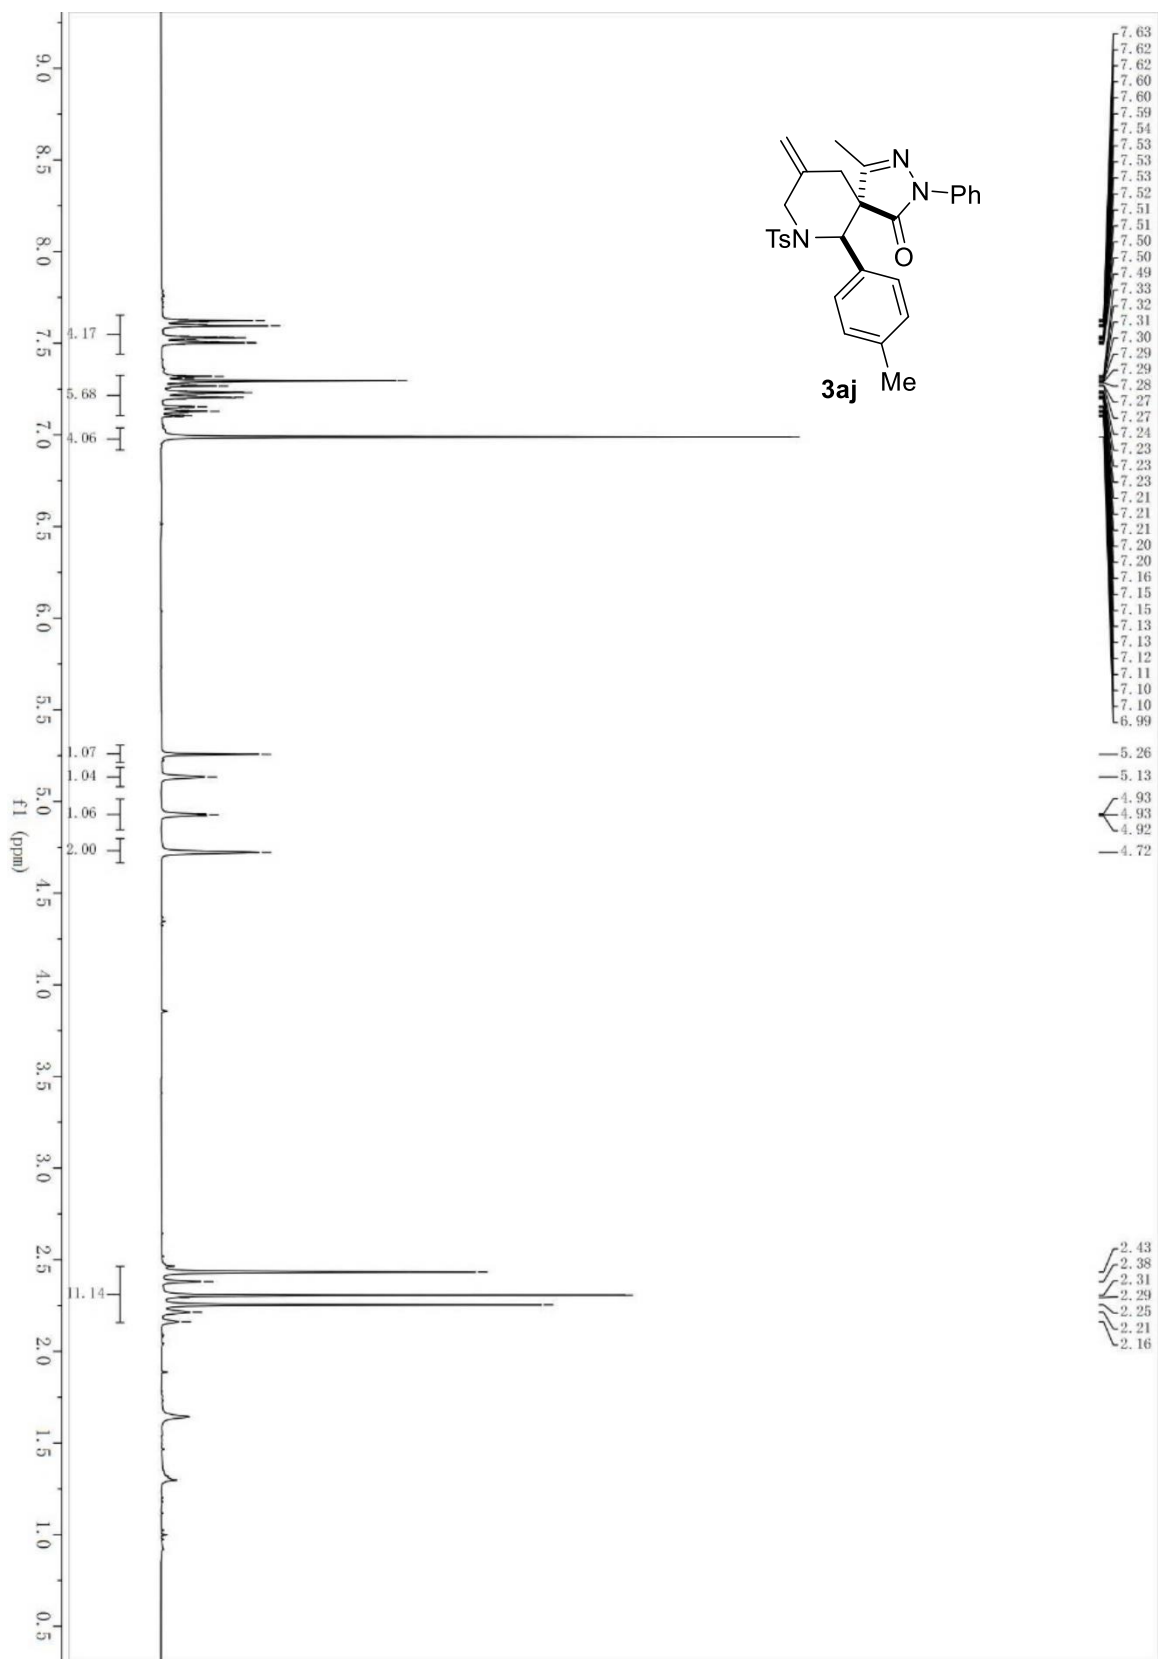

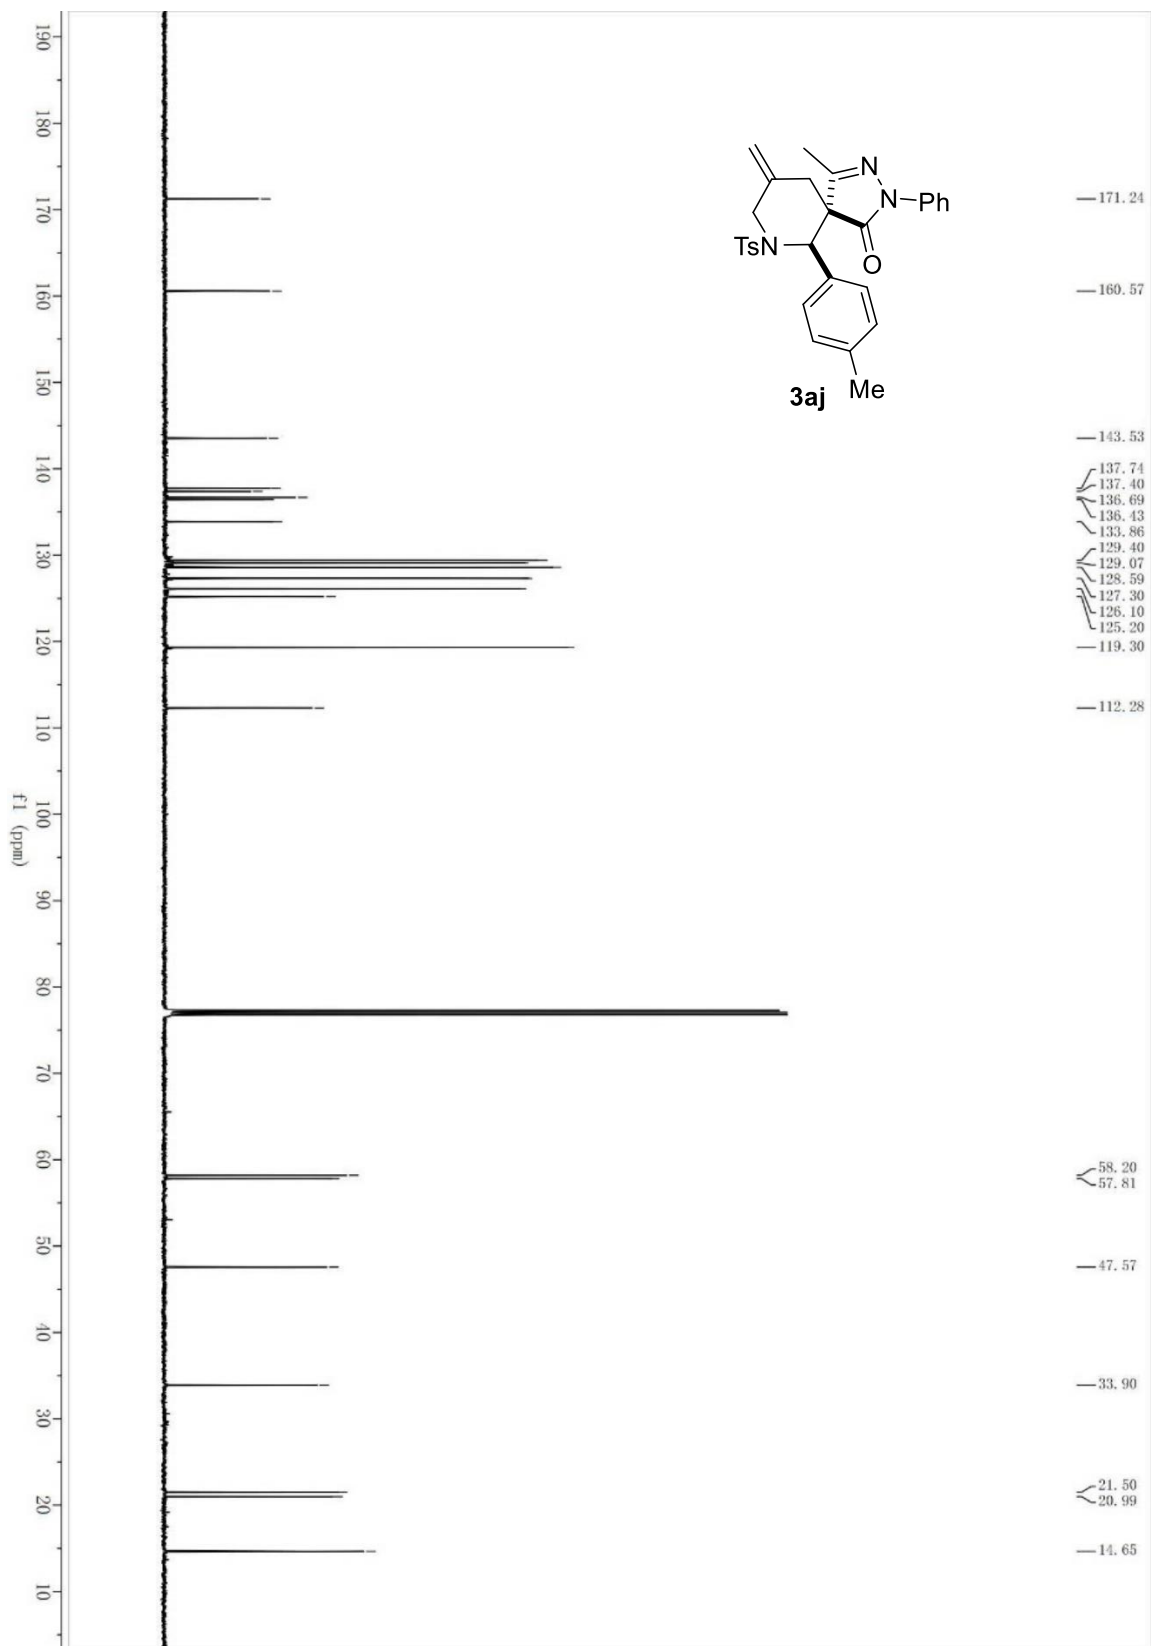

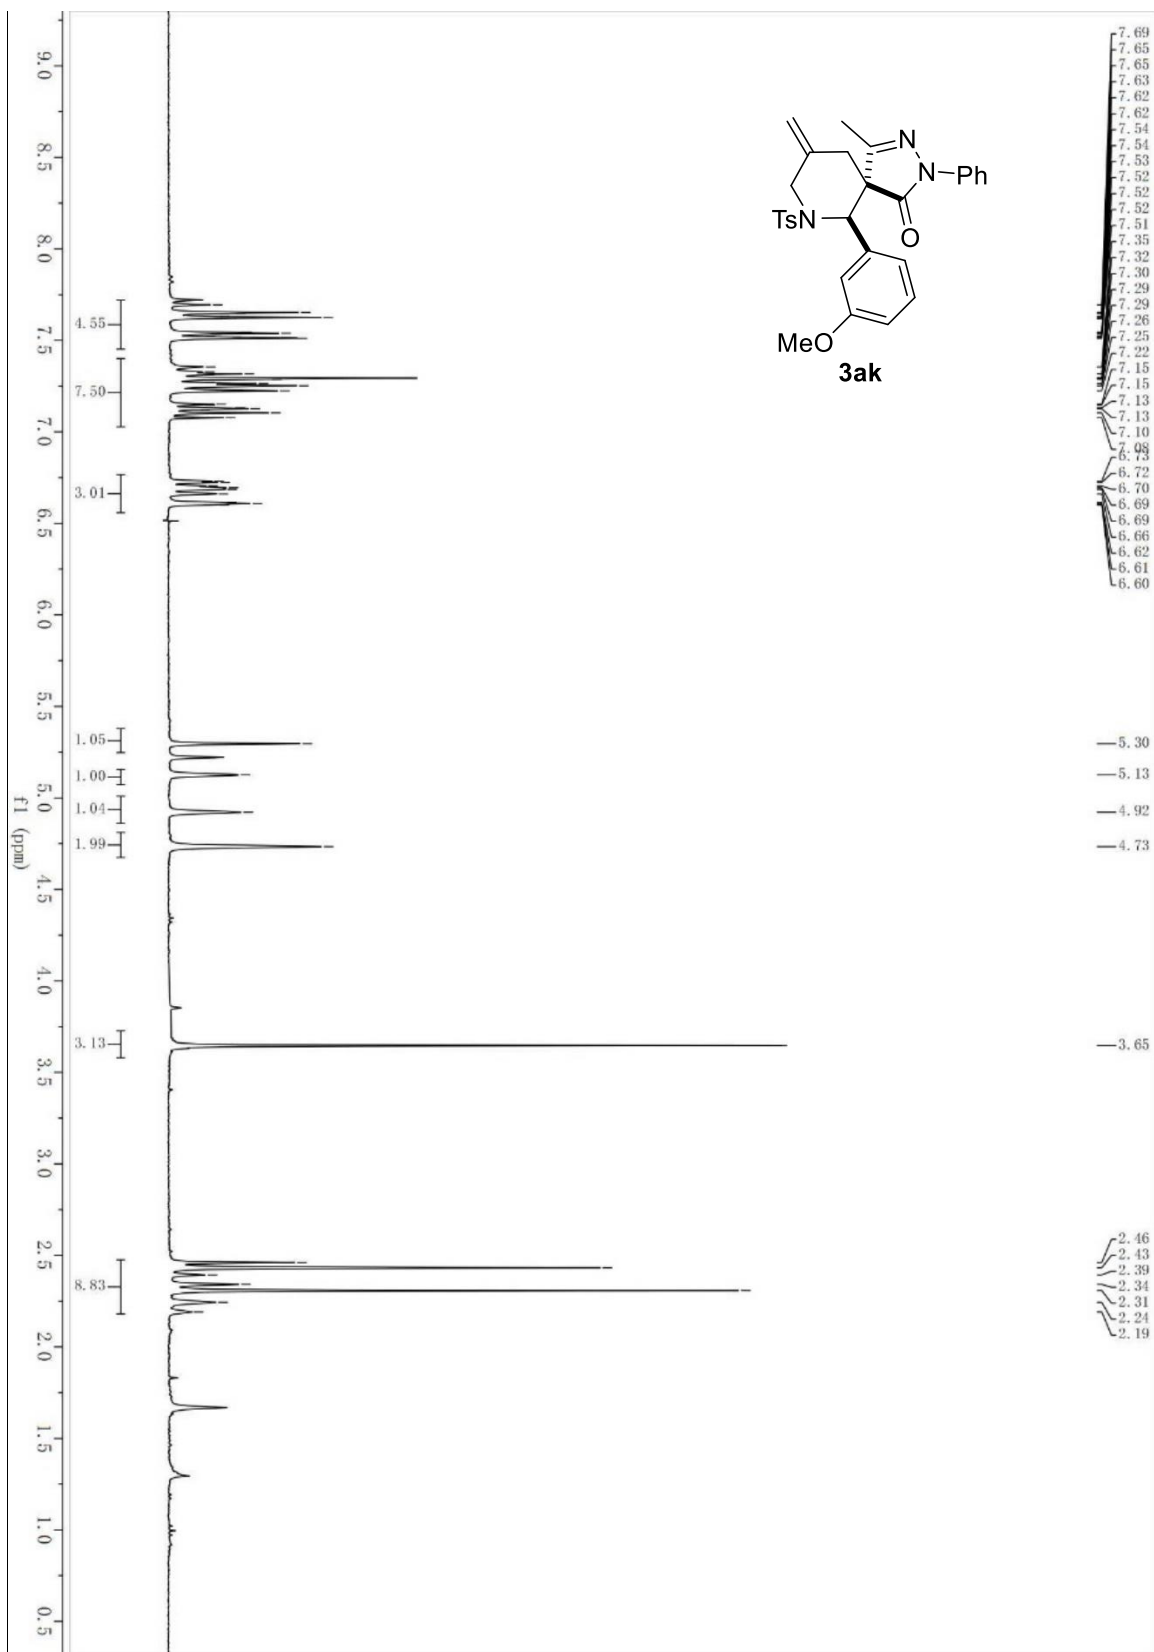

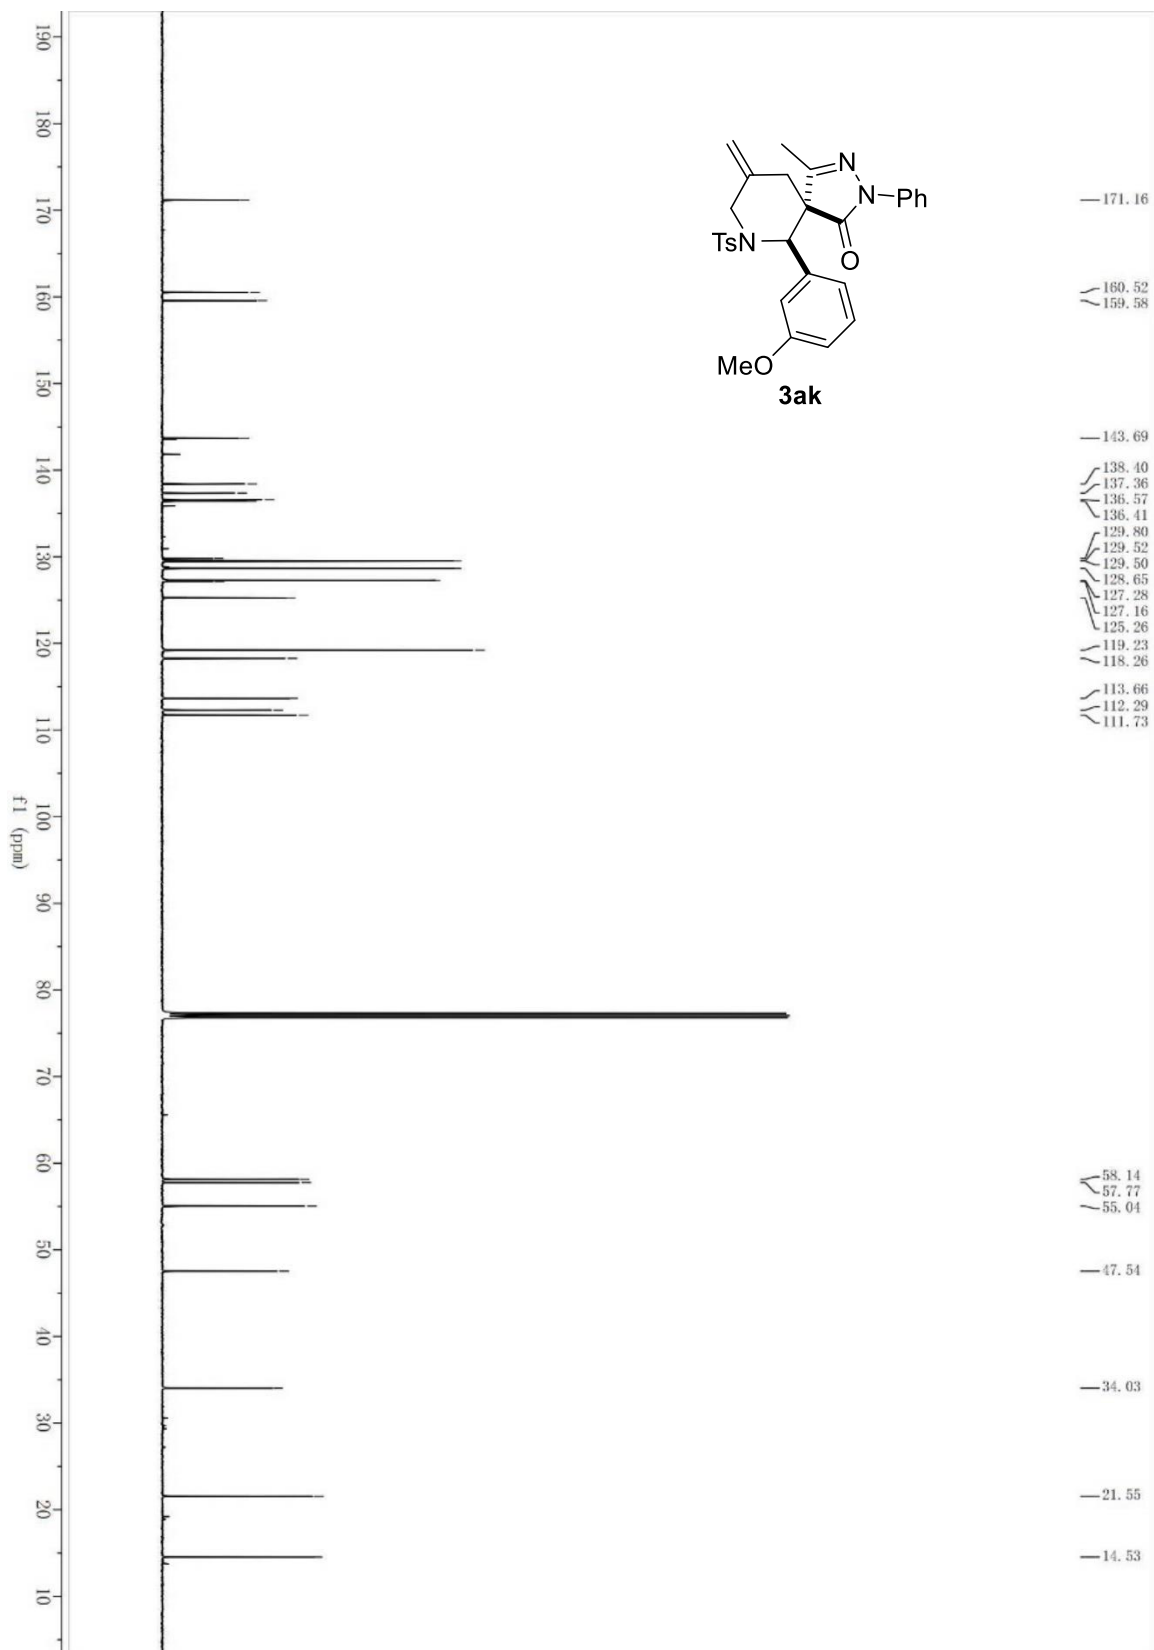

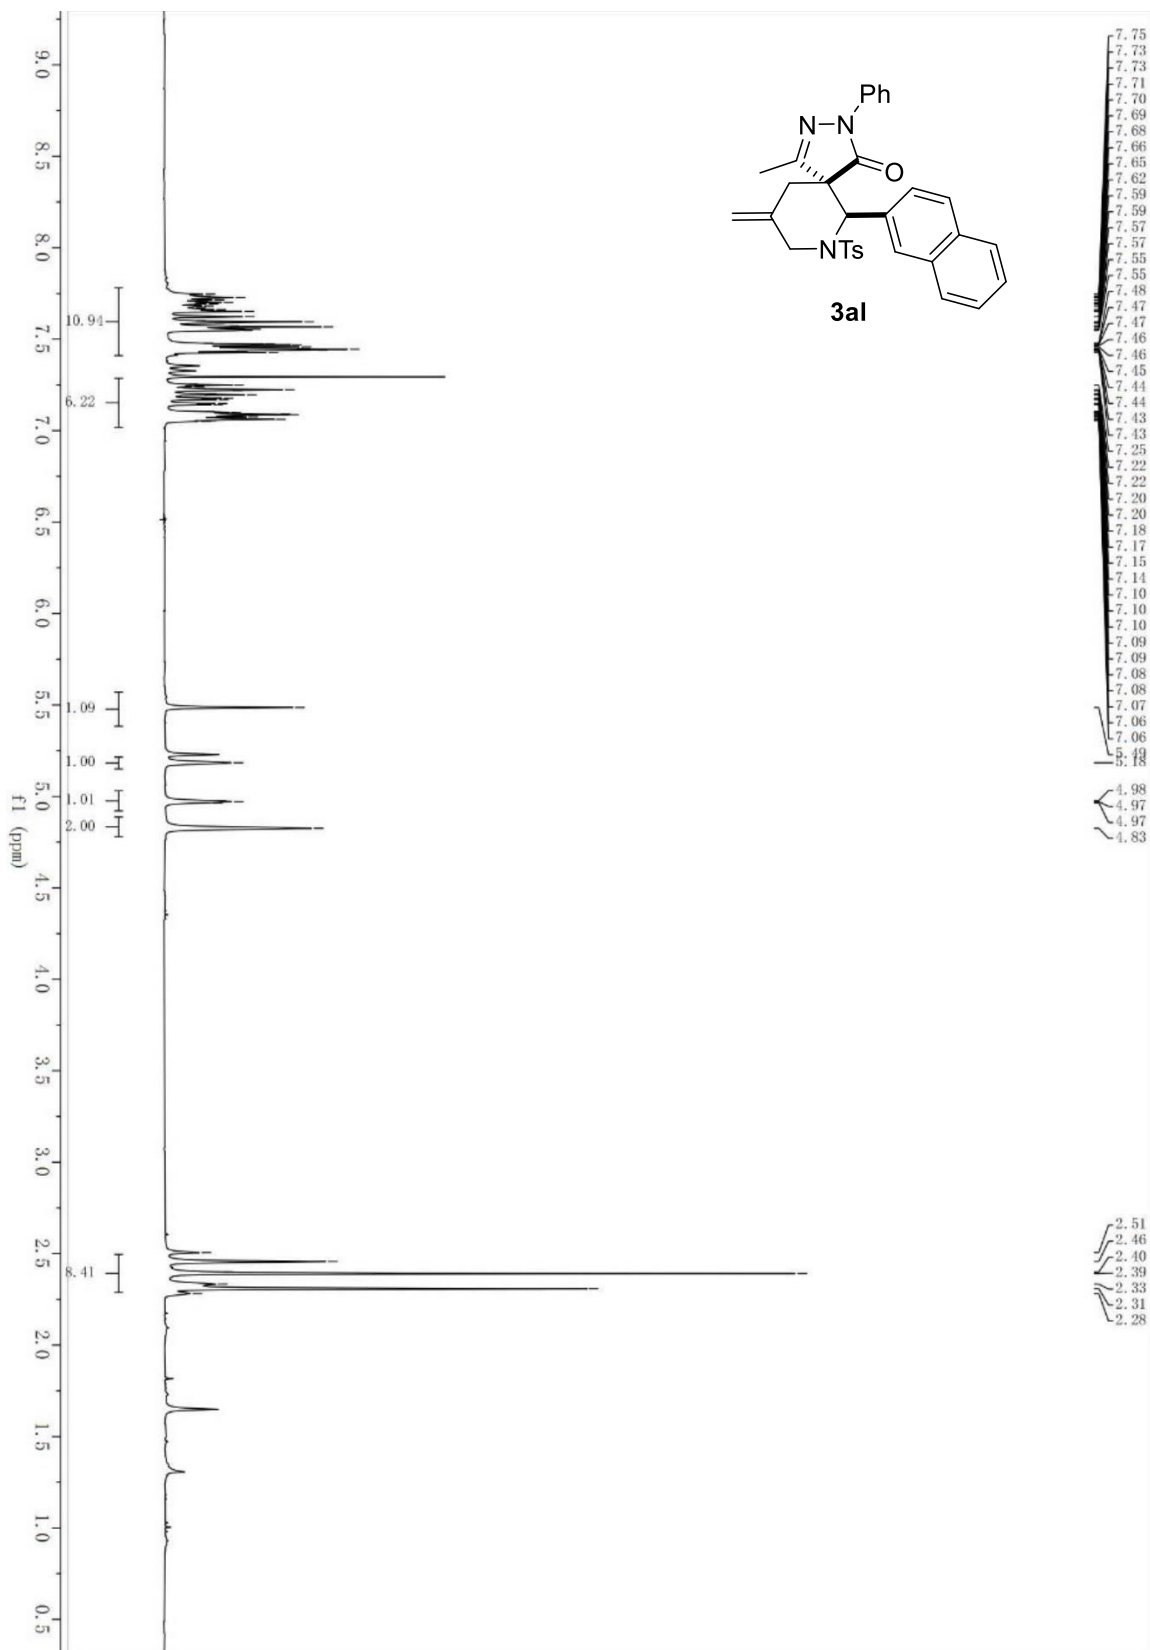

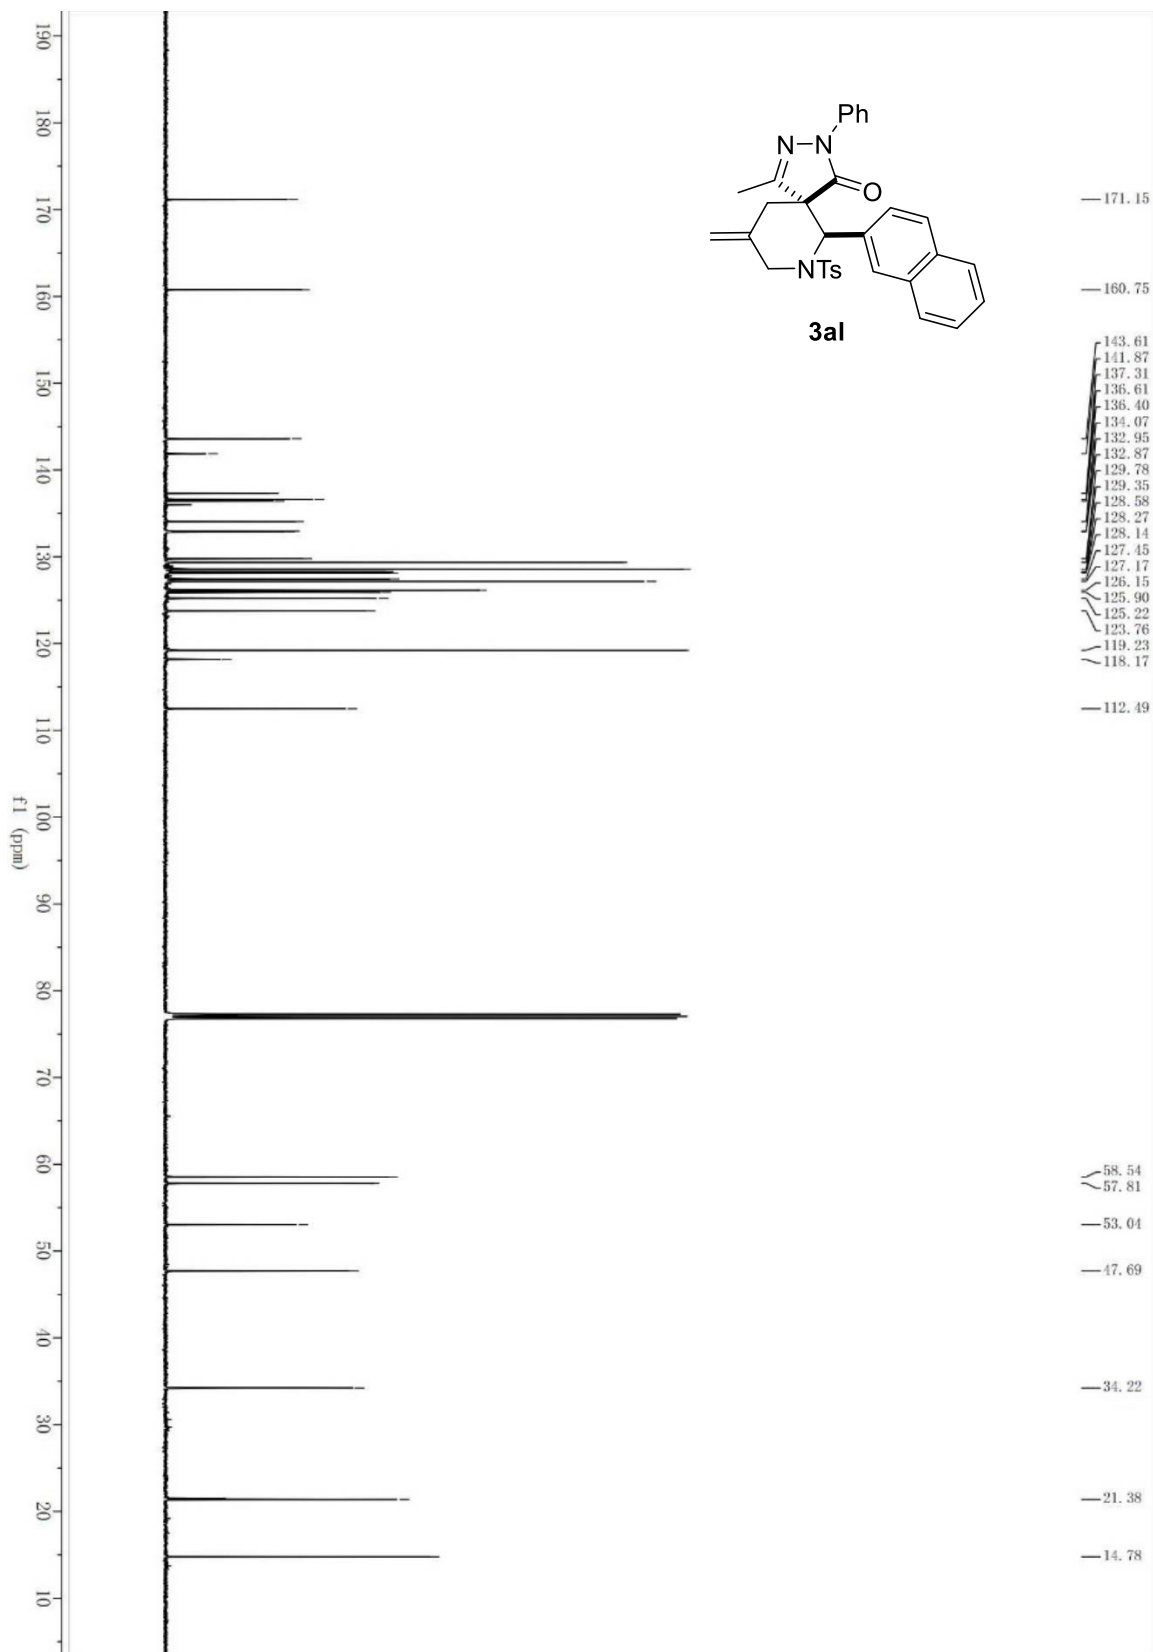

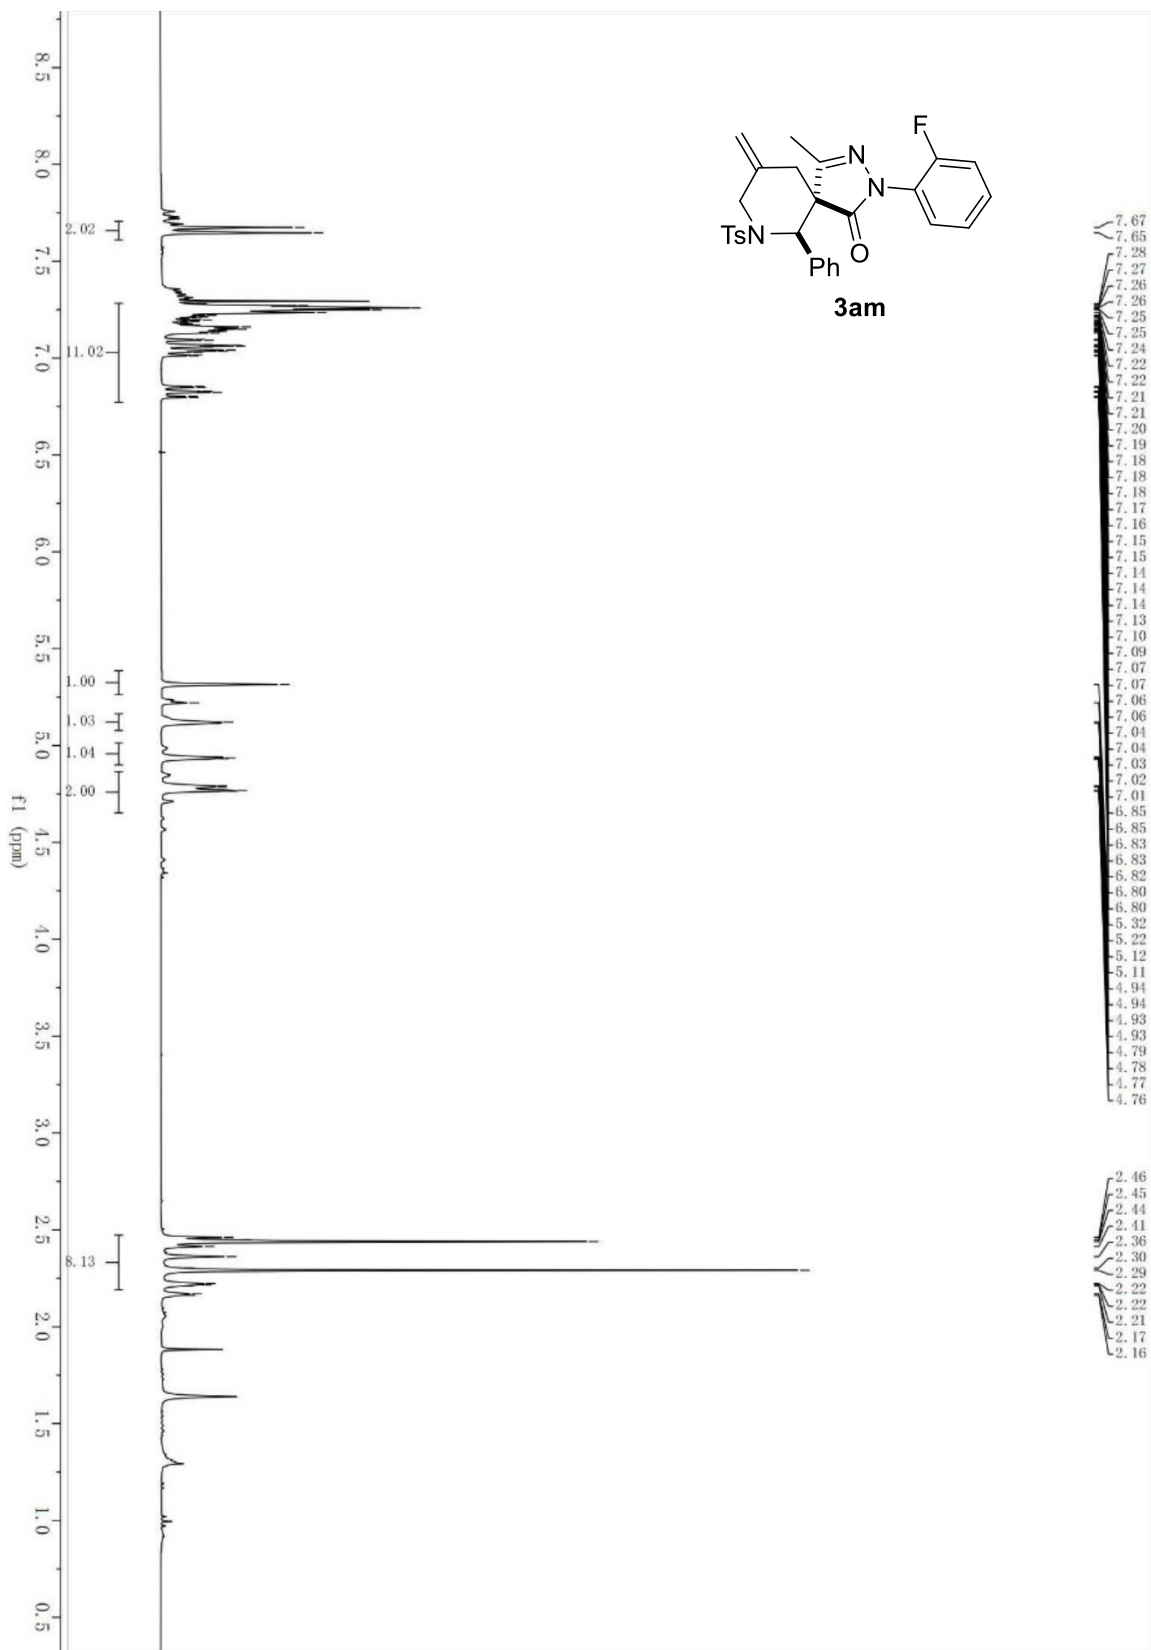

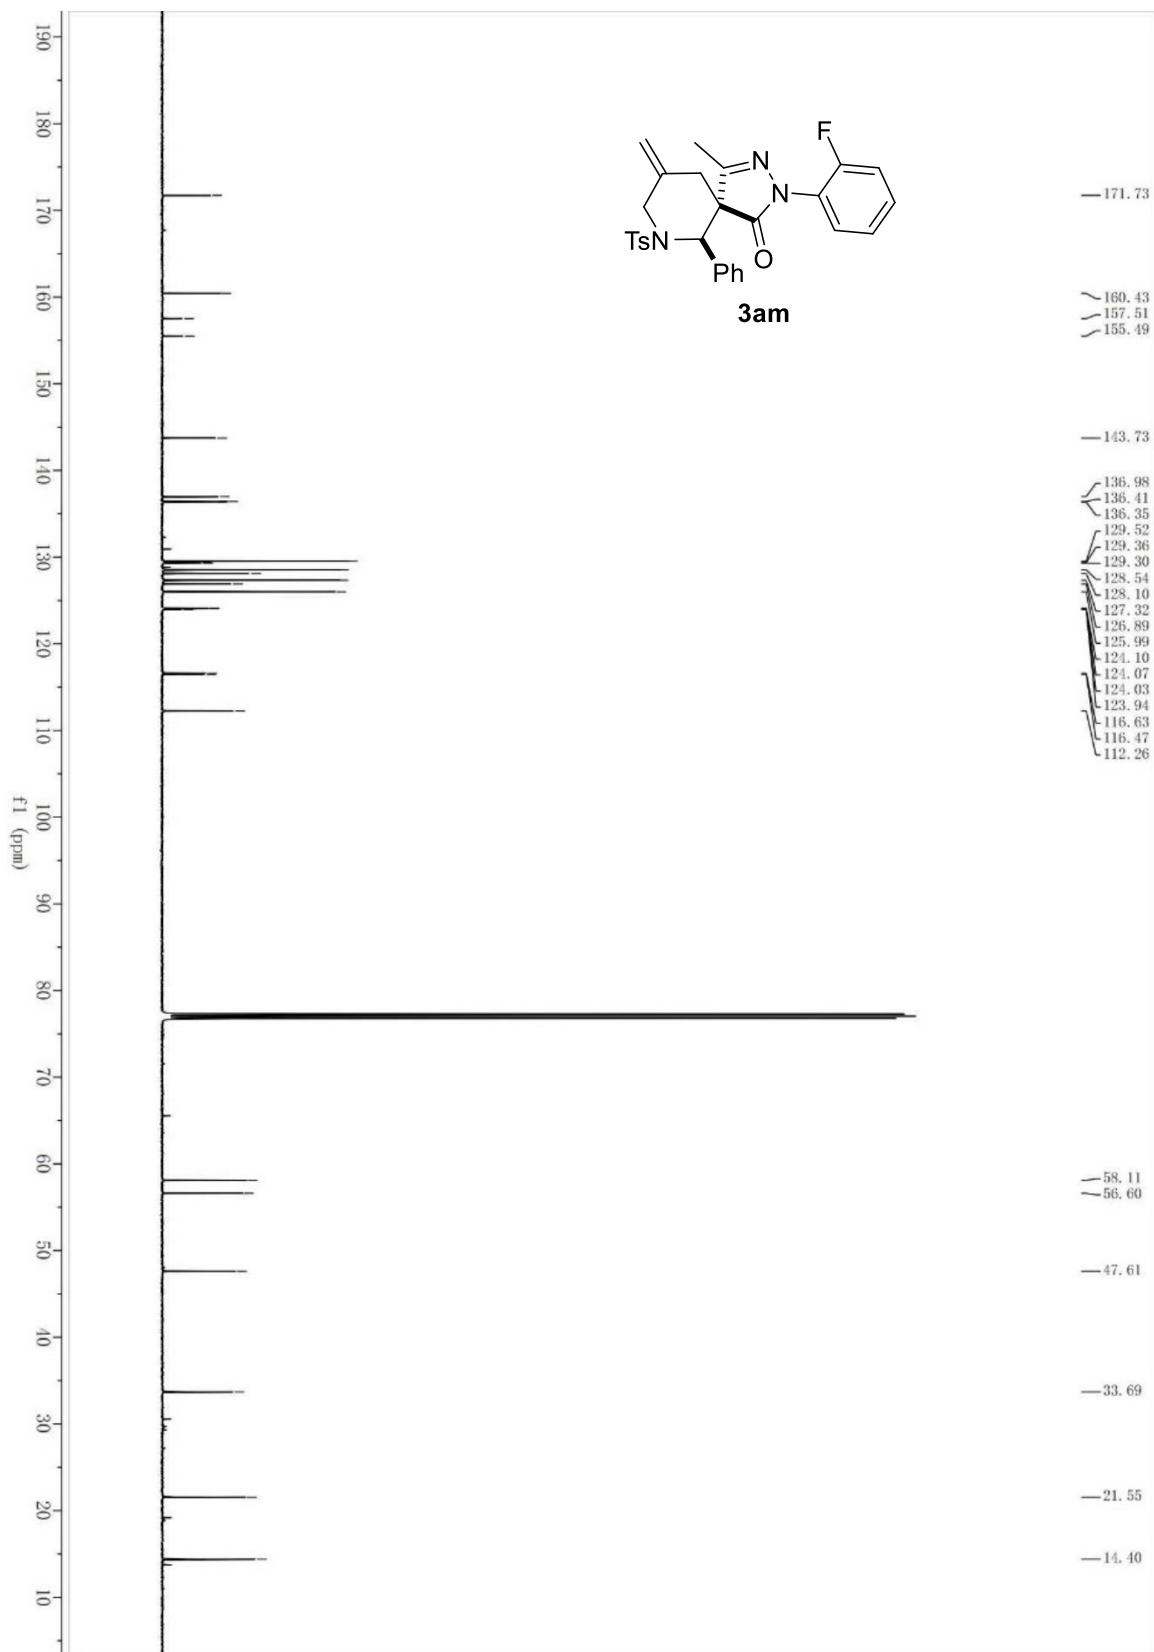



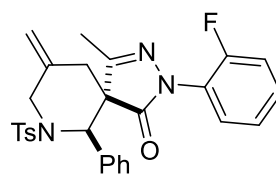

**3am**

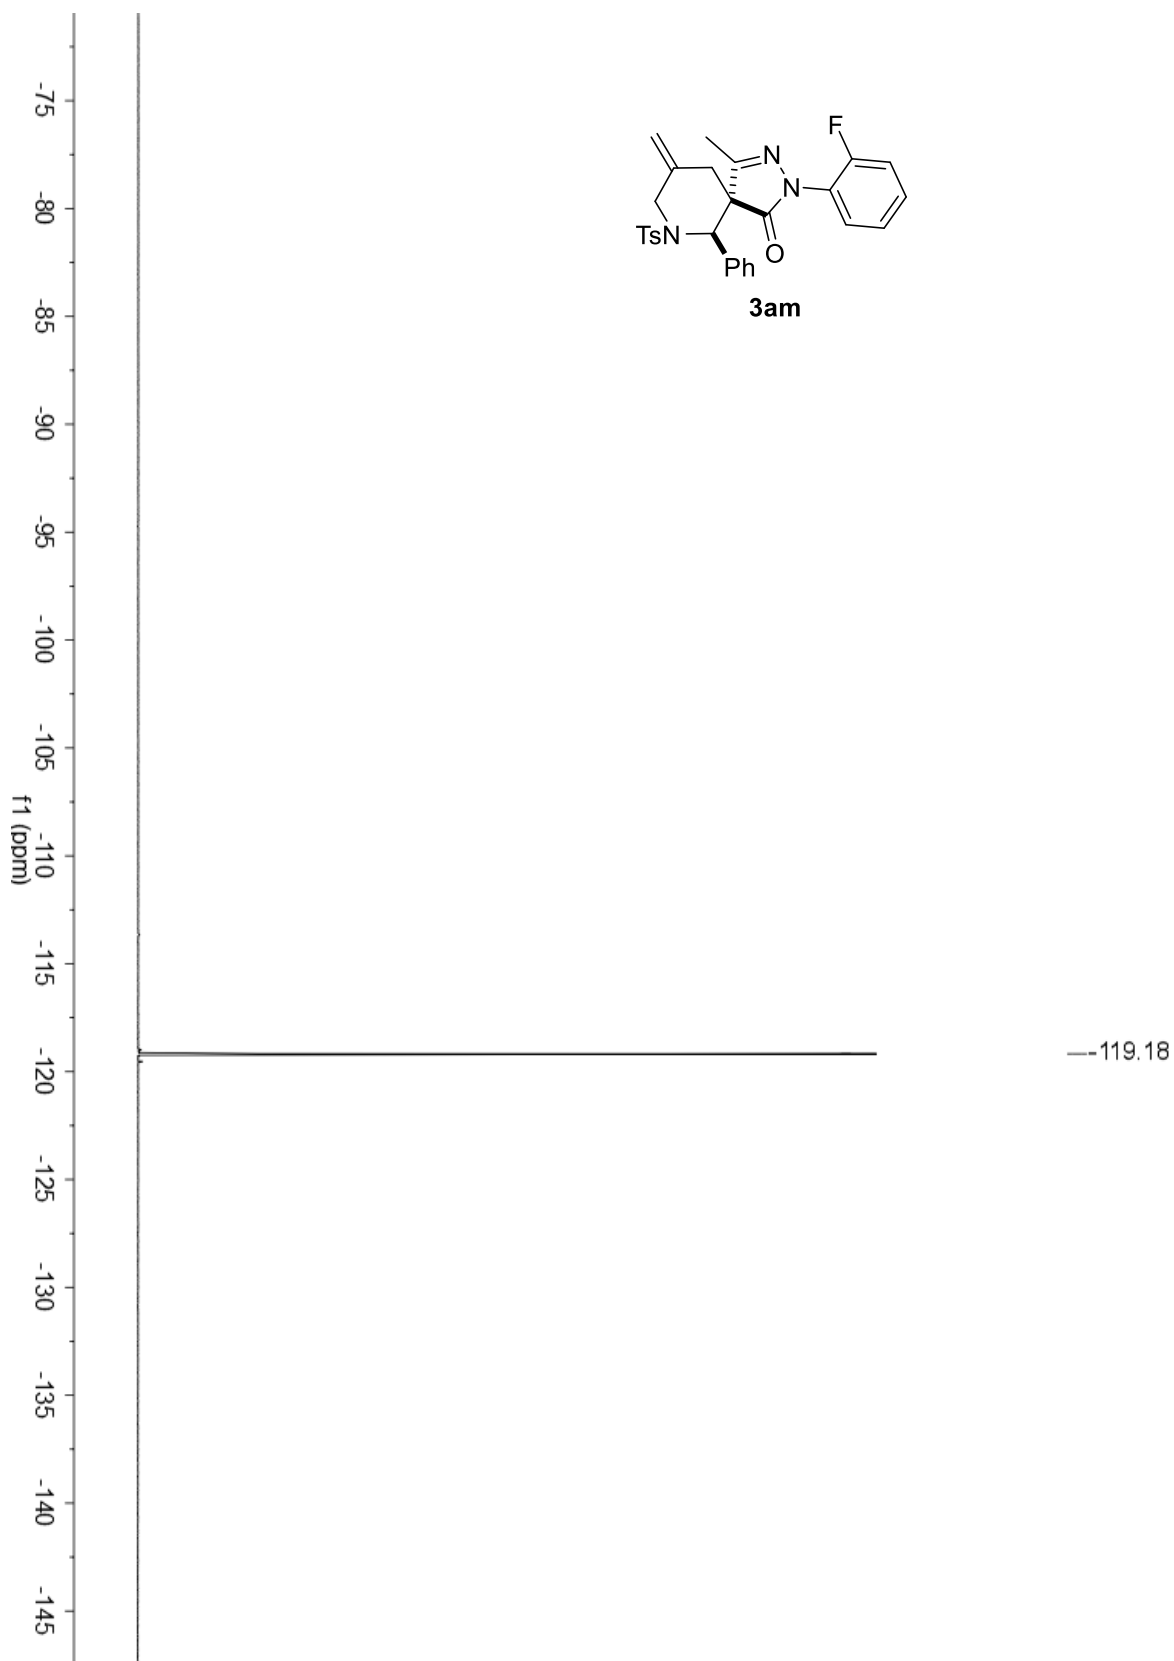

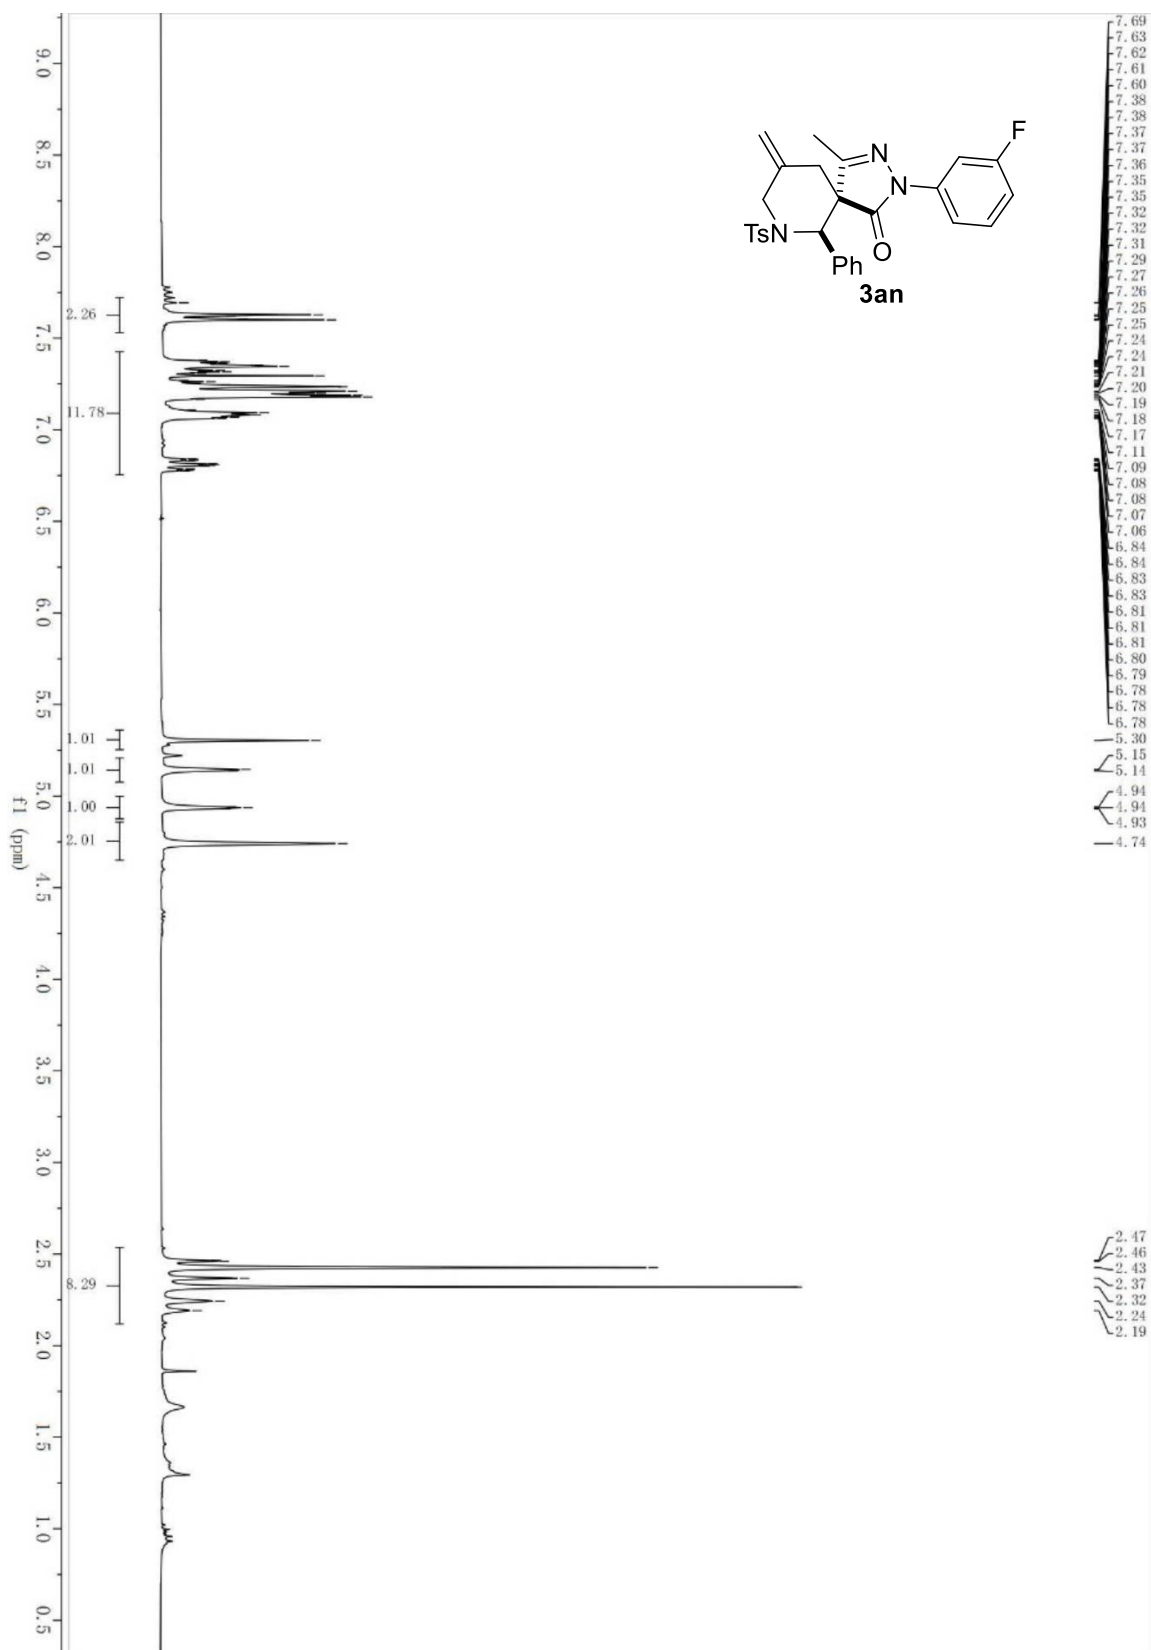

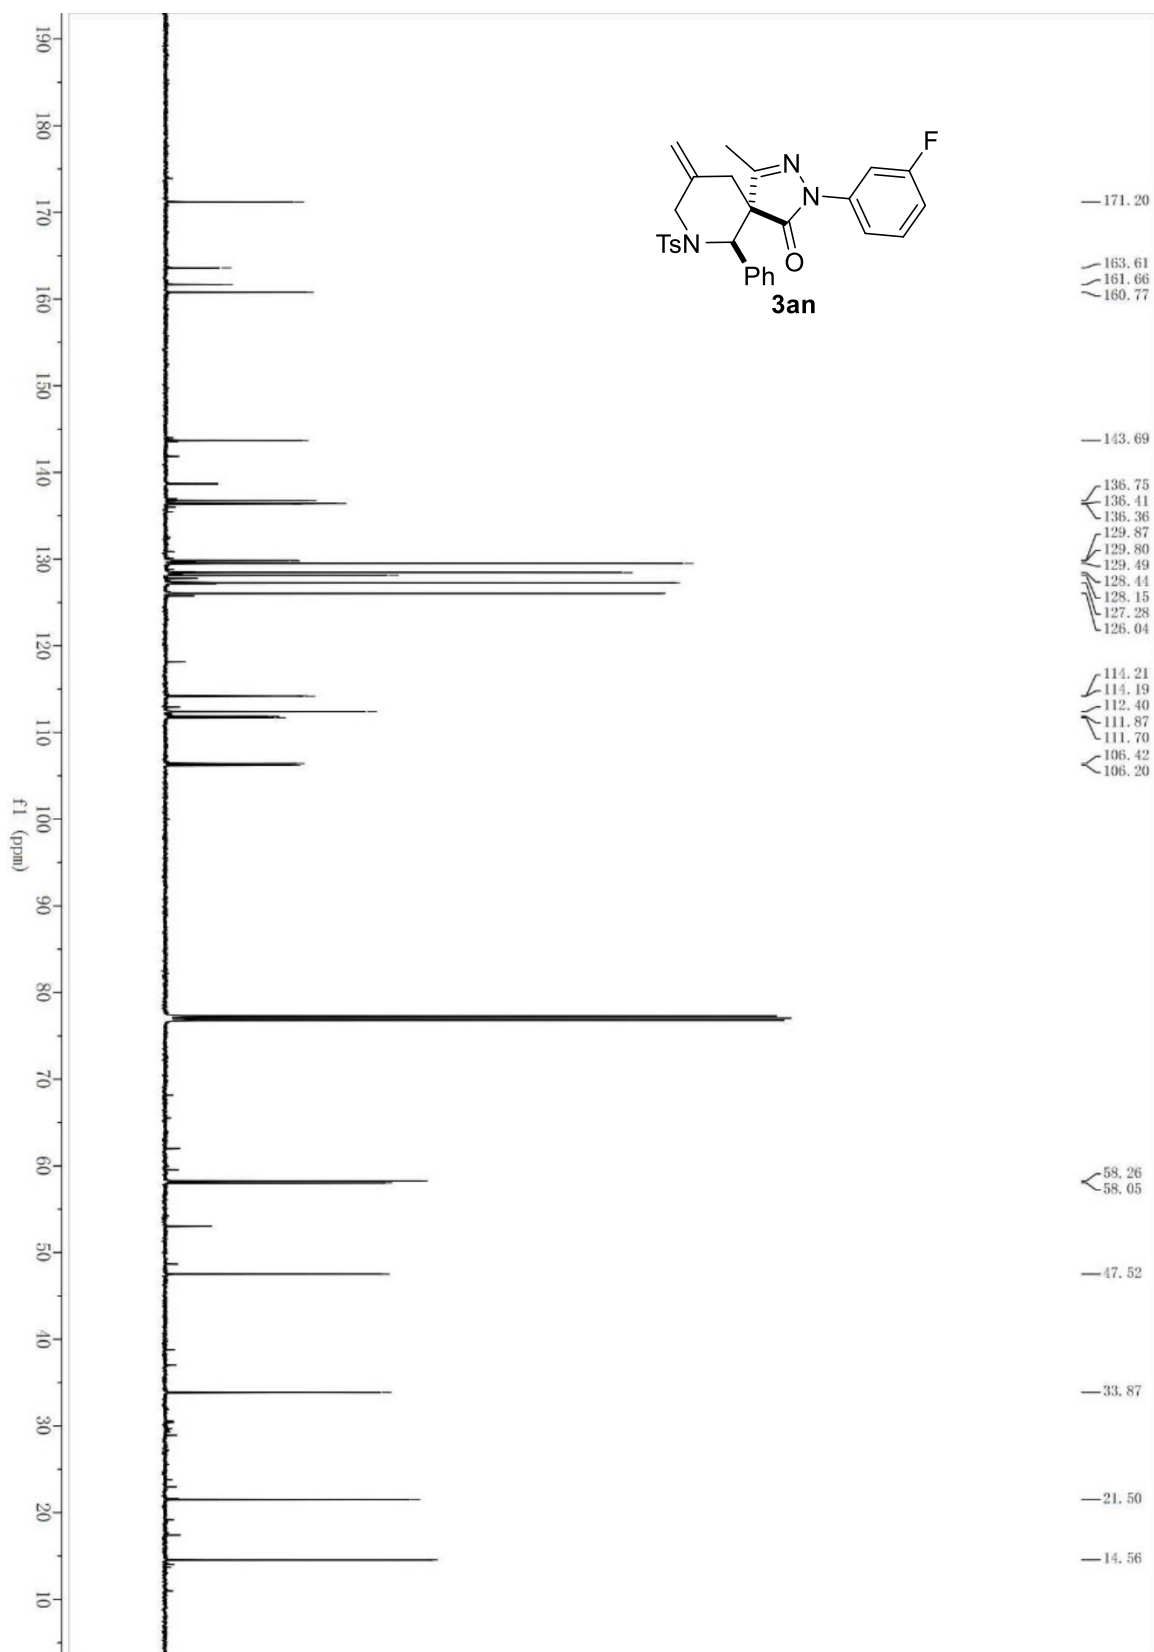

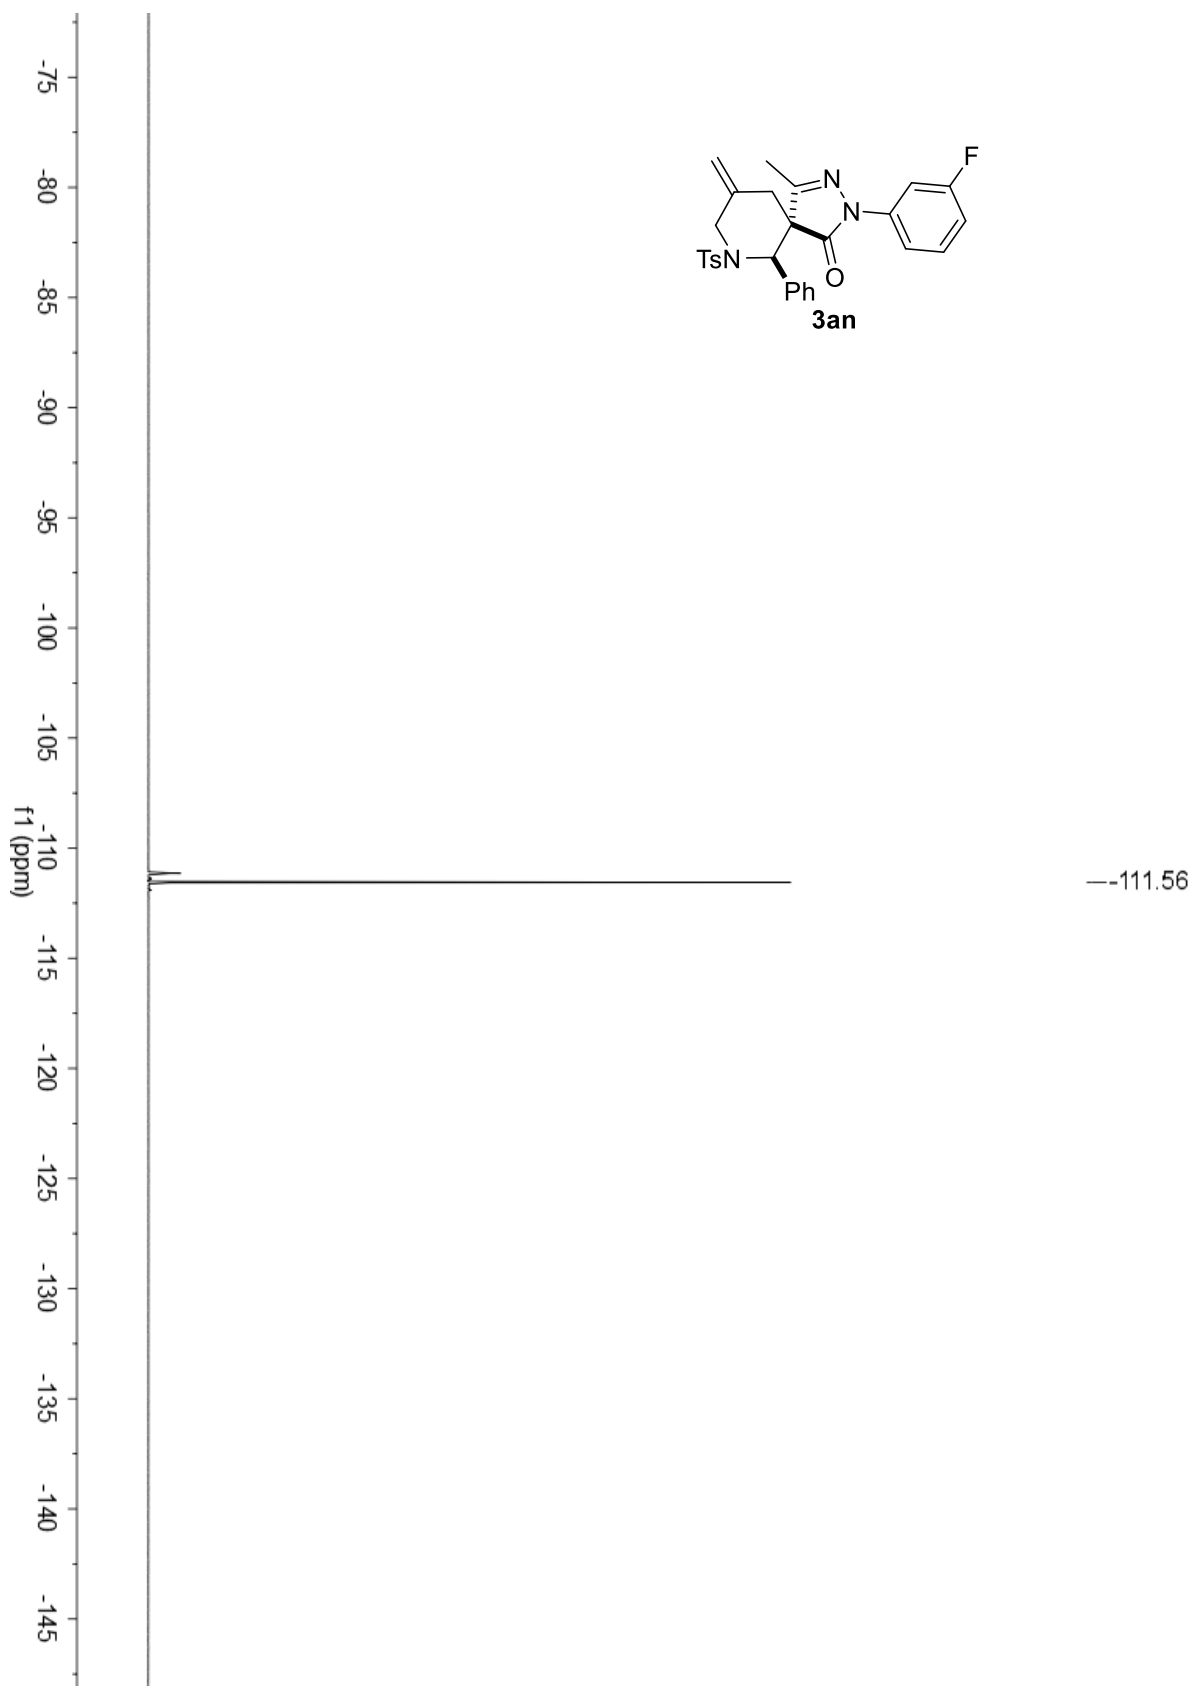

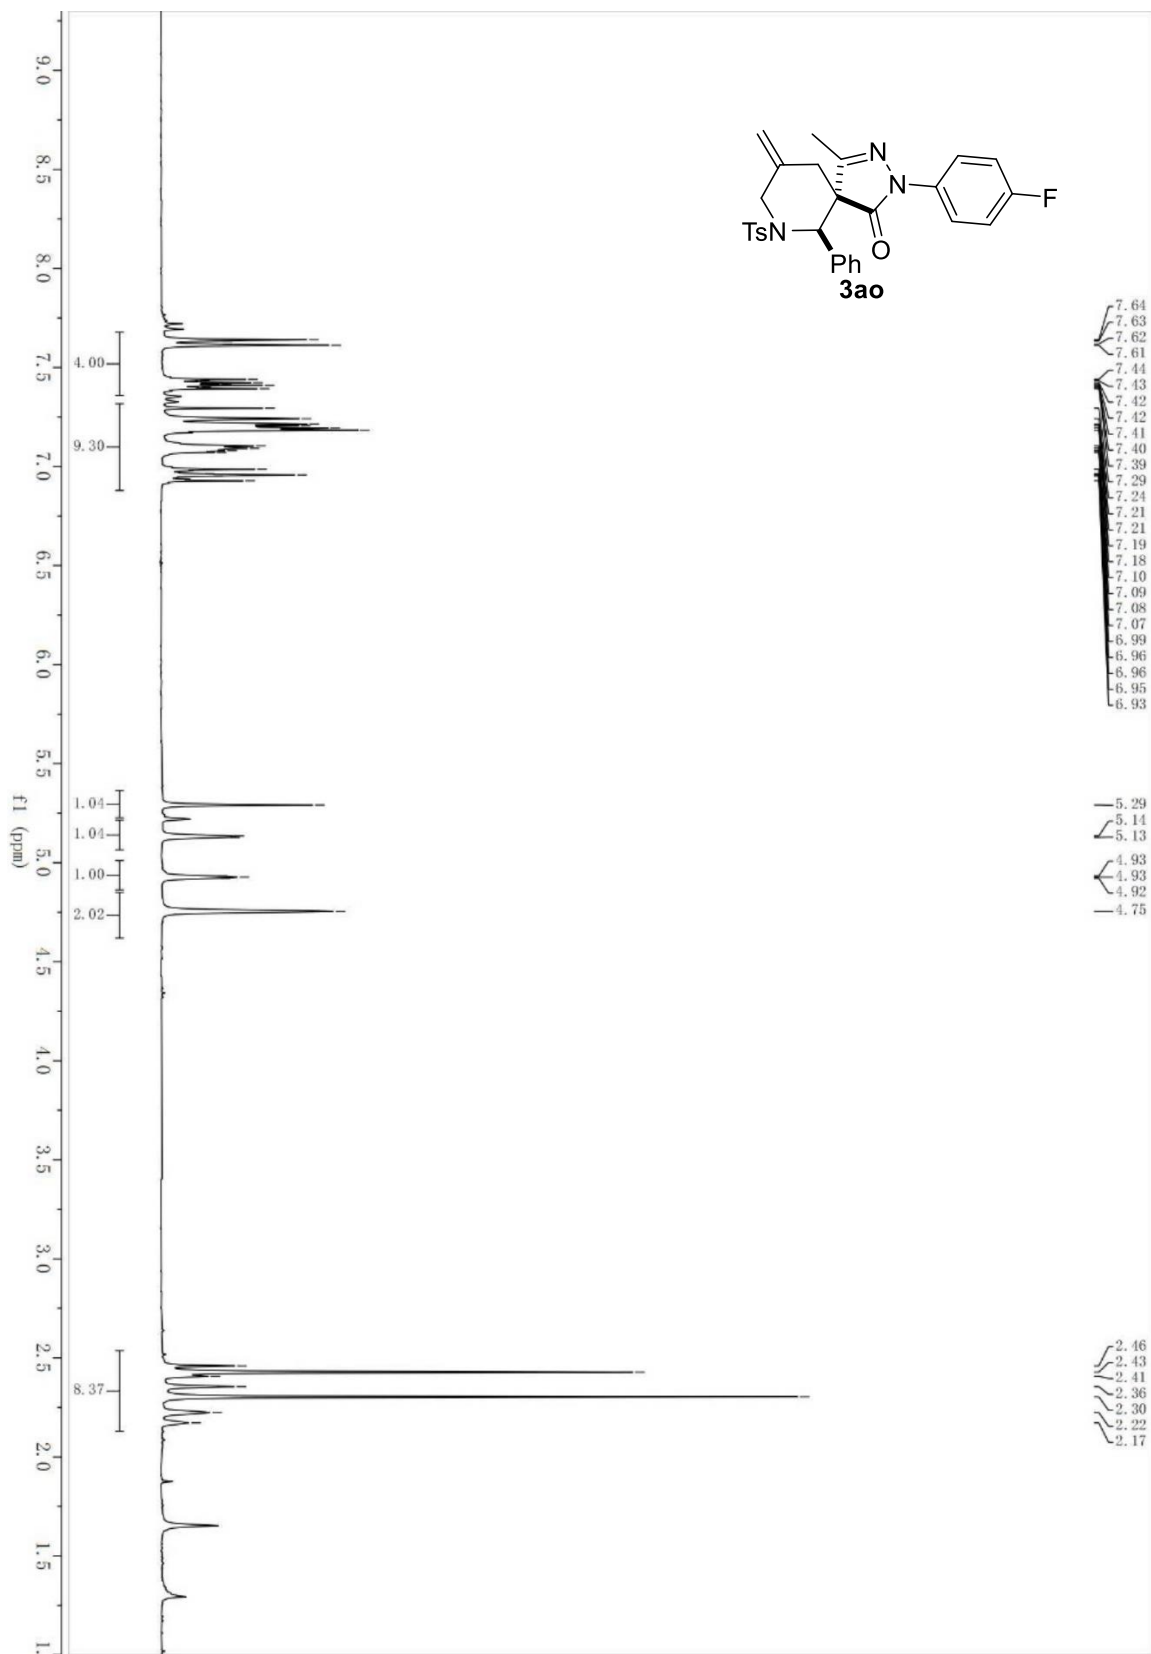

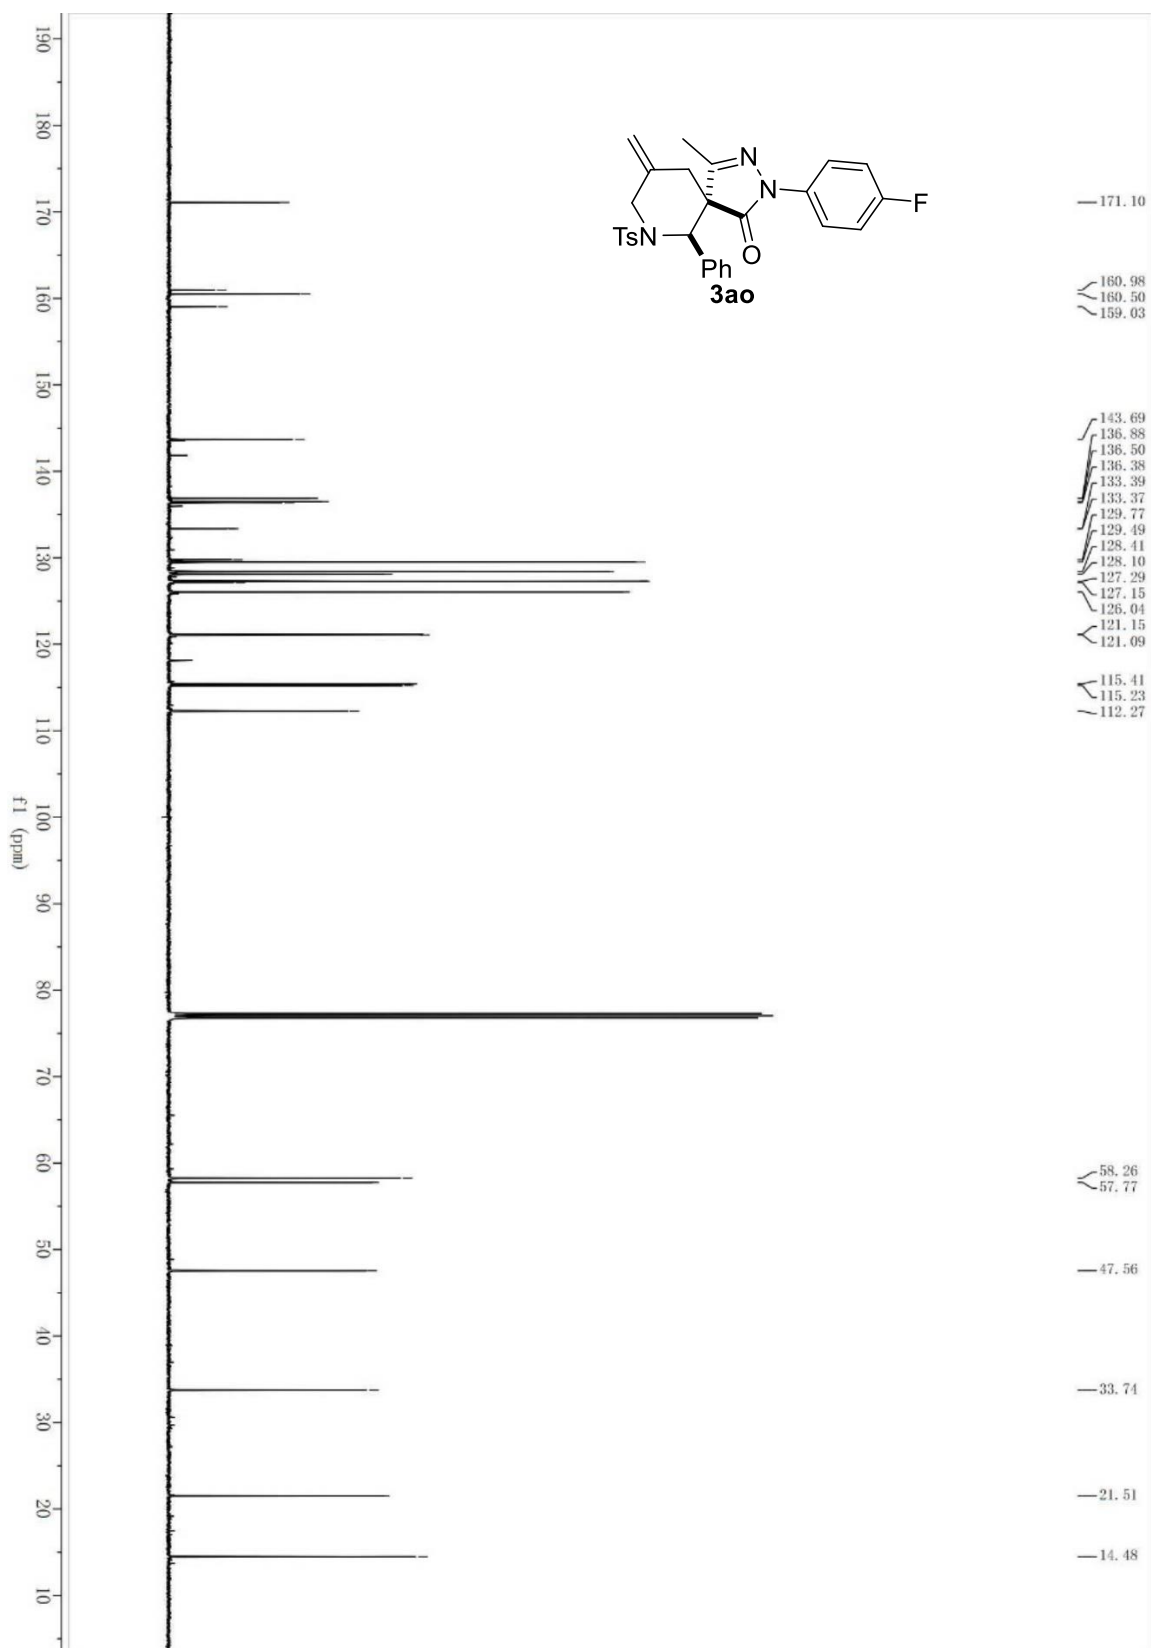

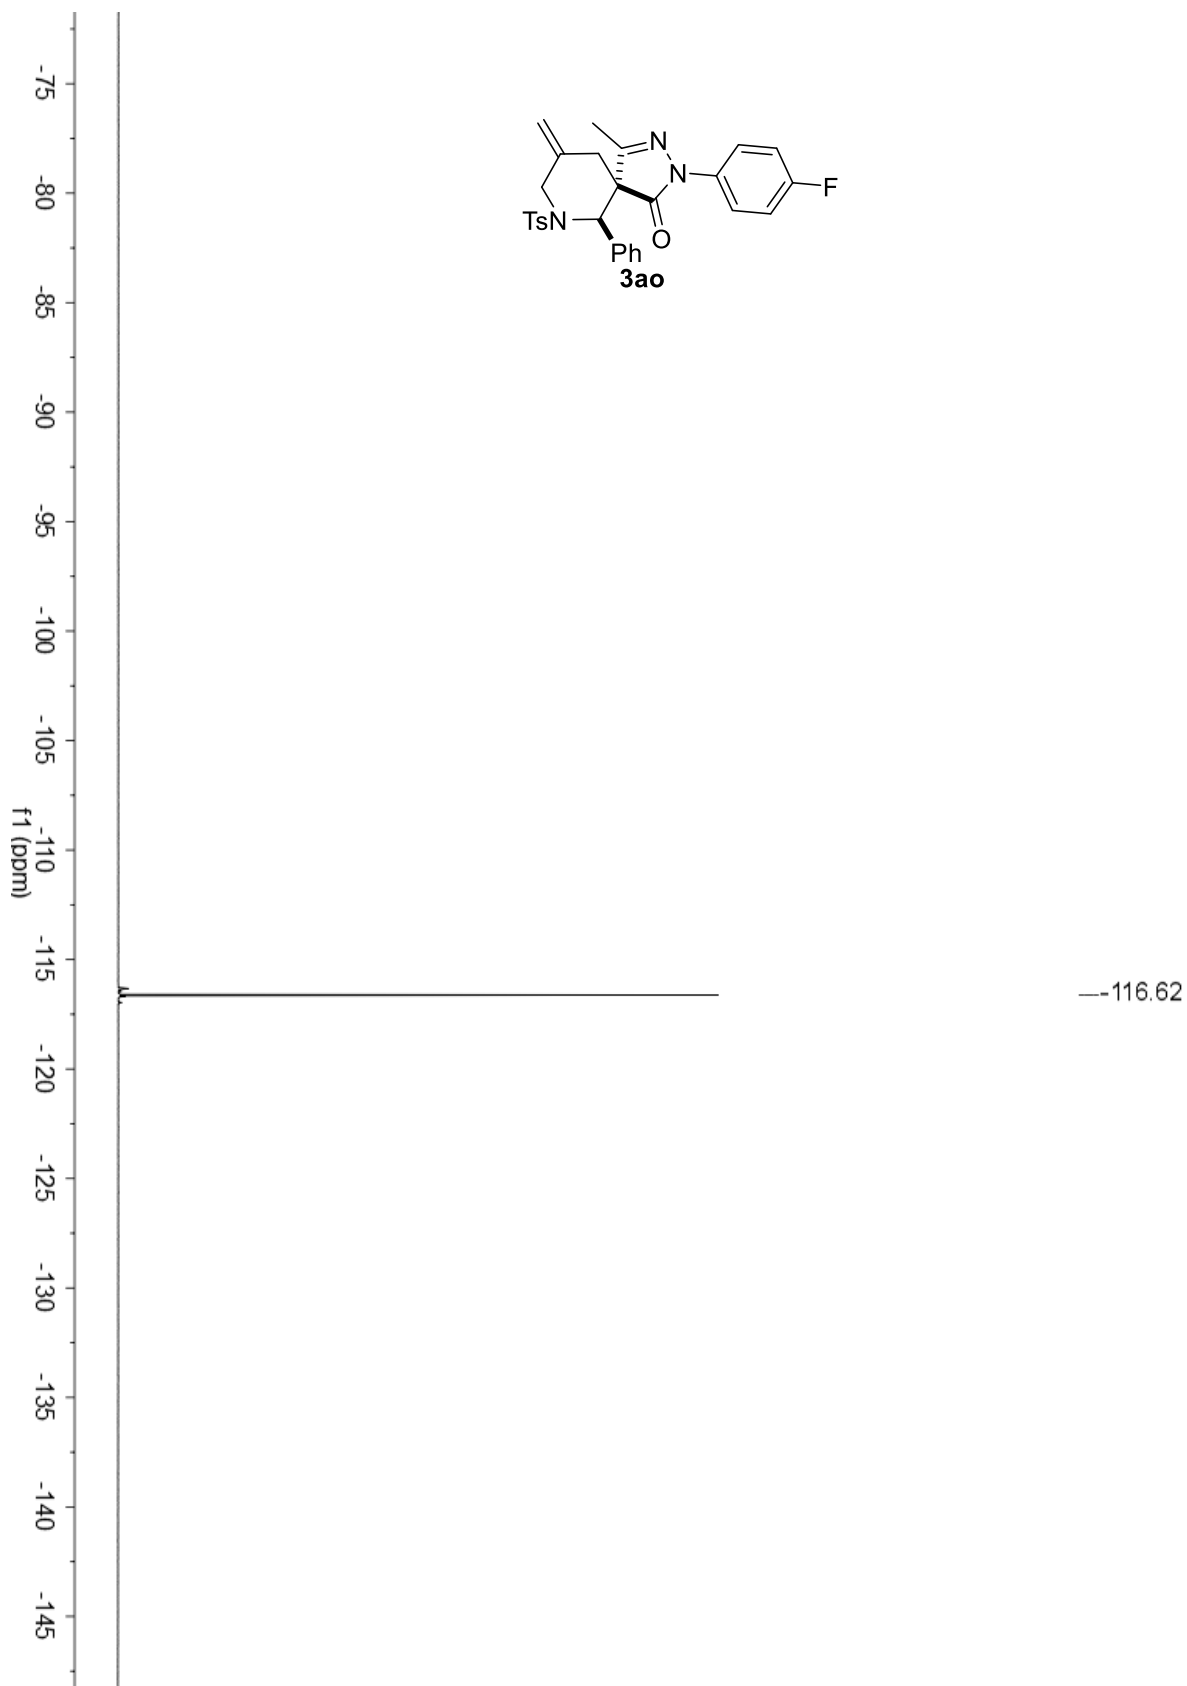

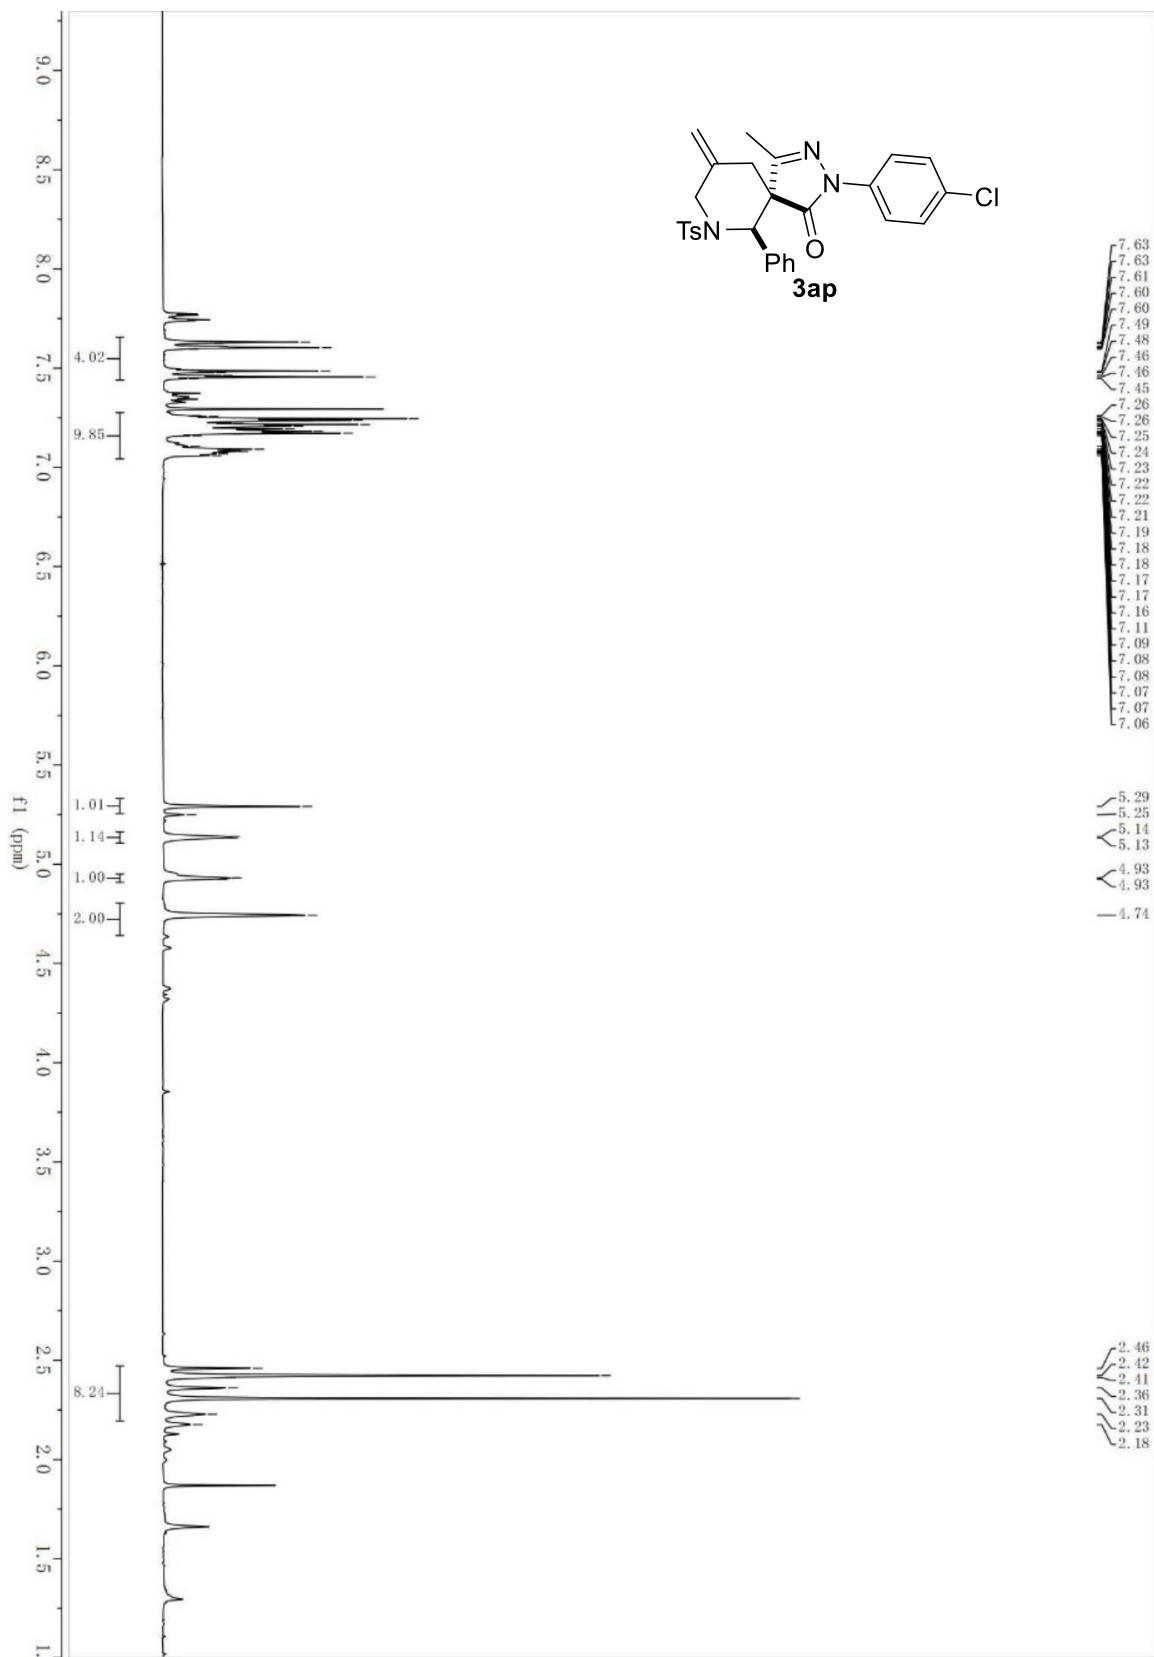



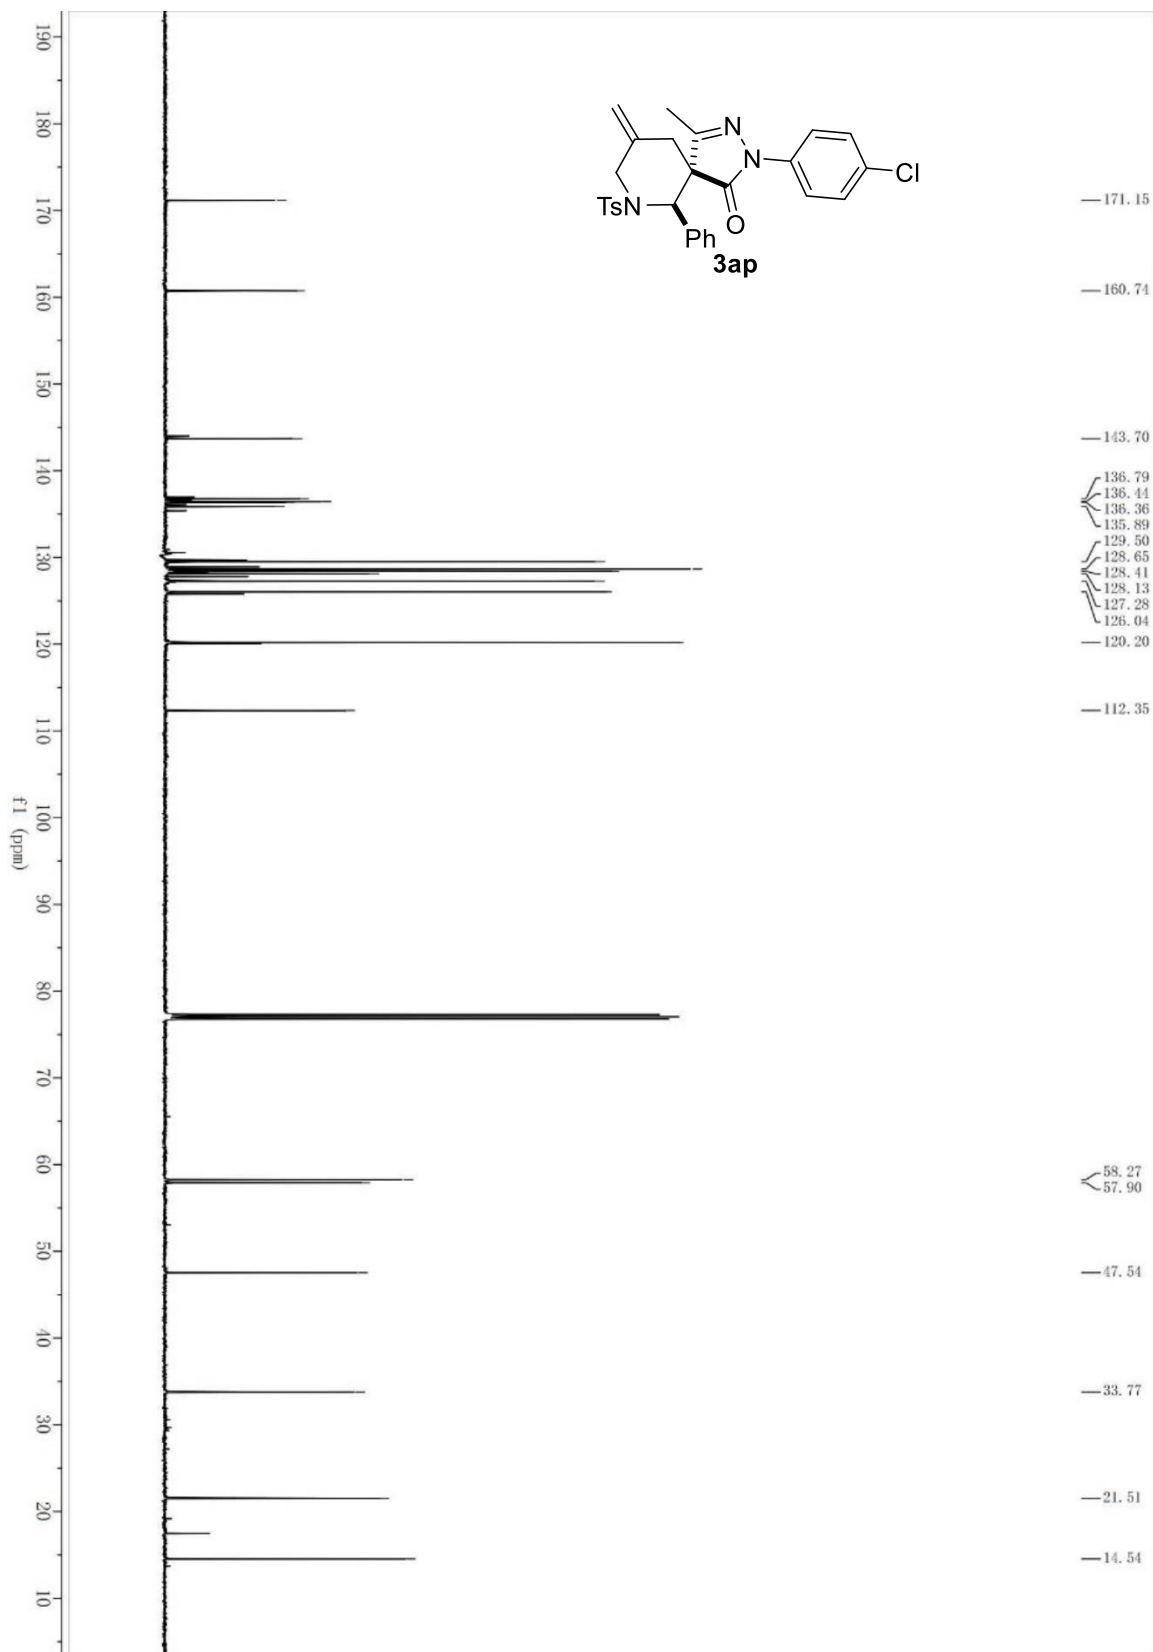

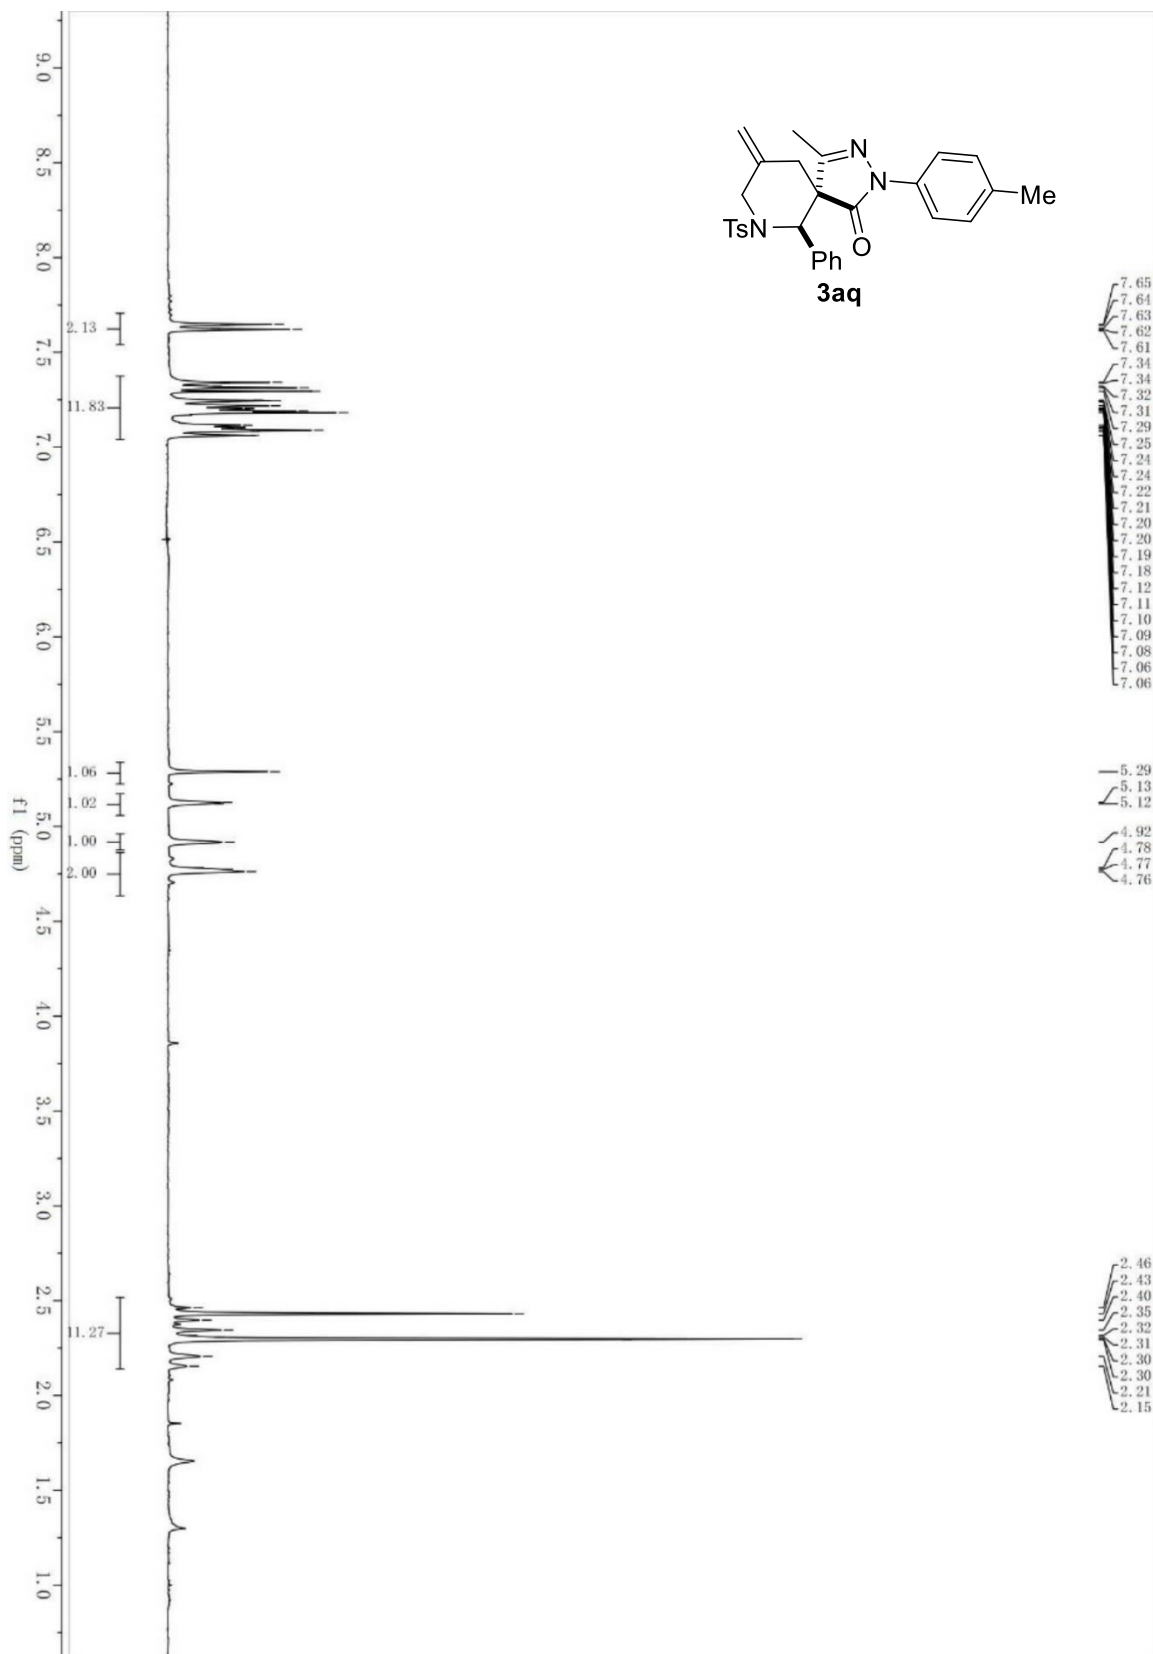

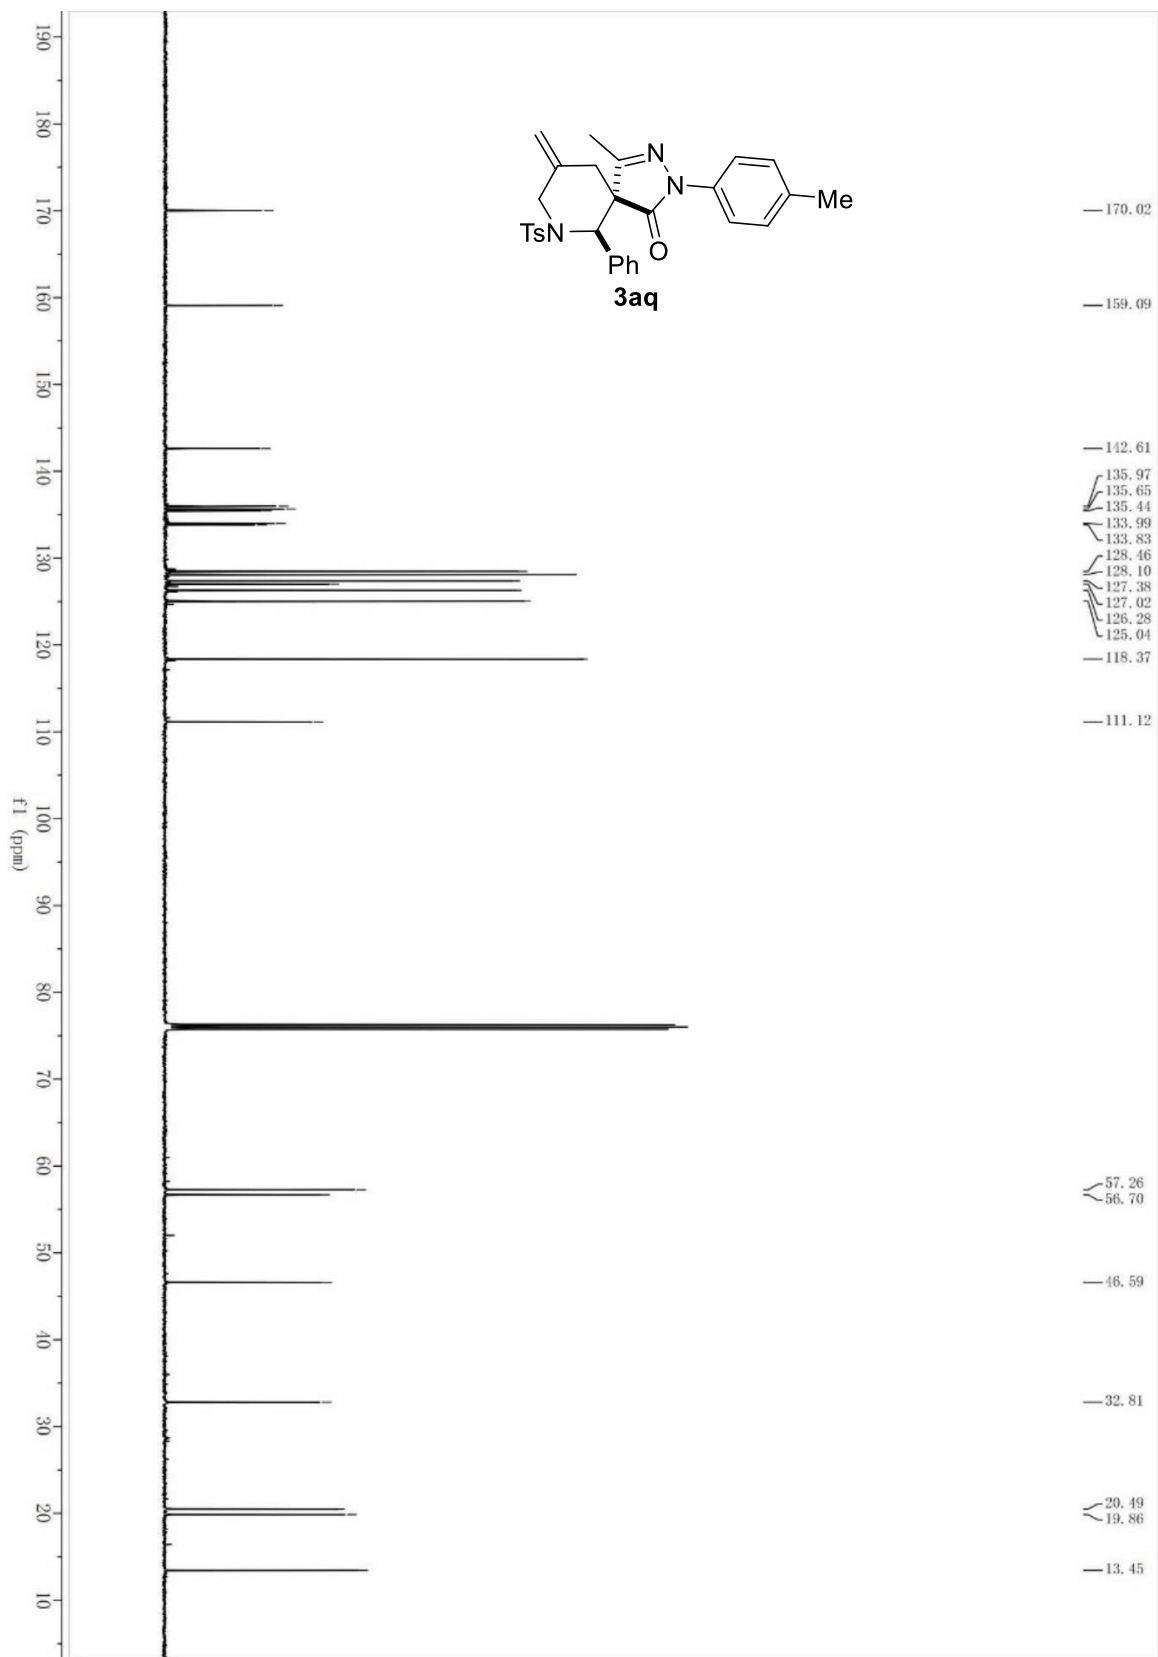

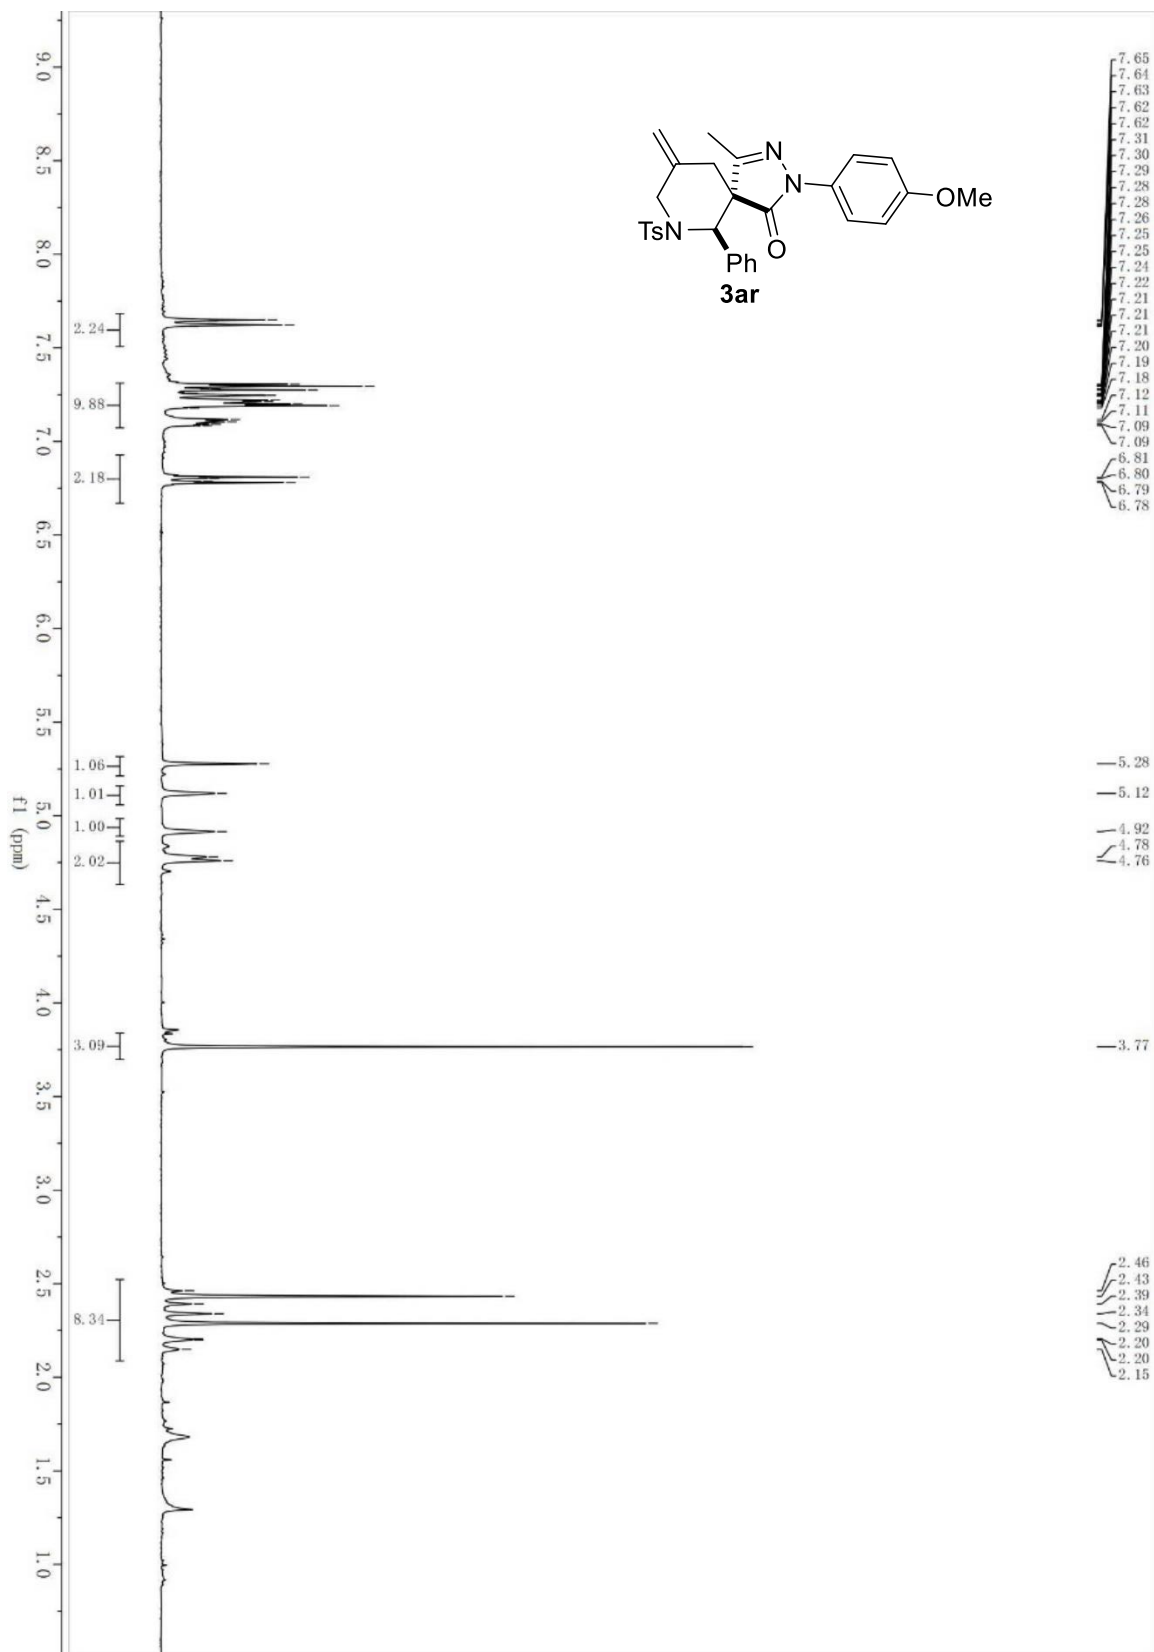



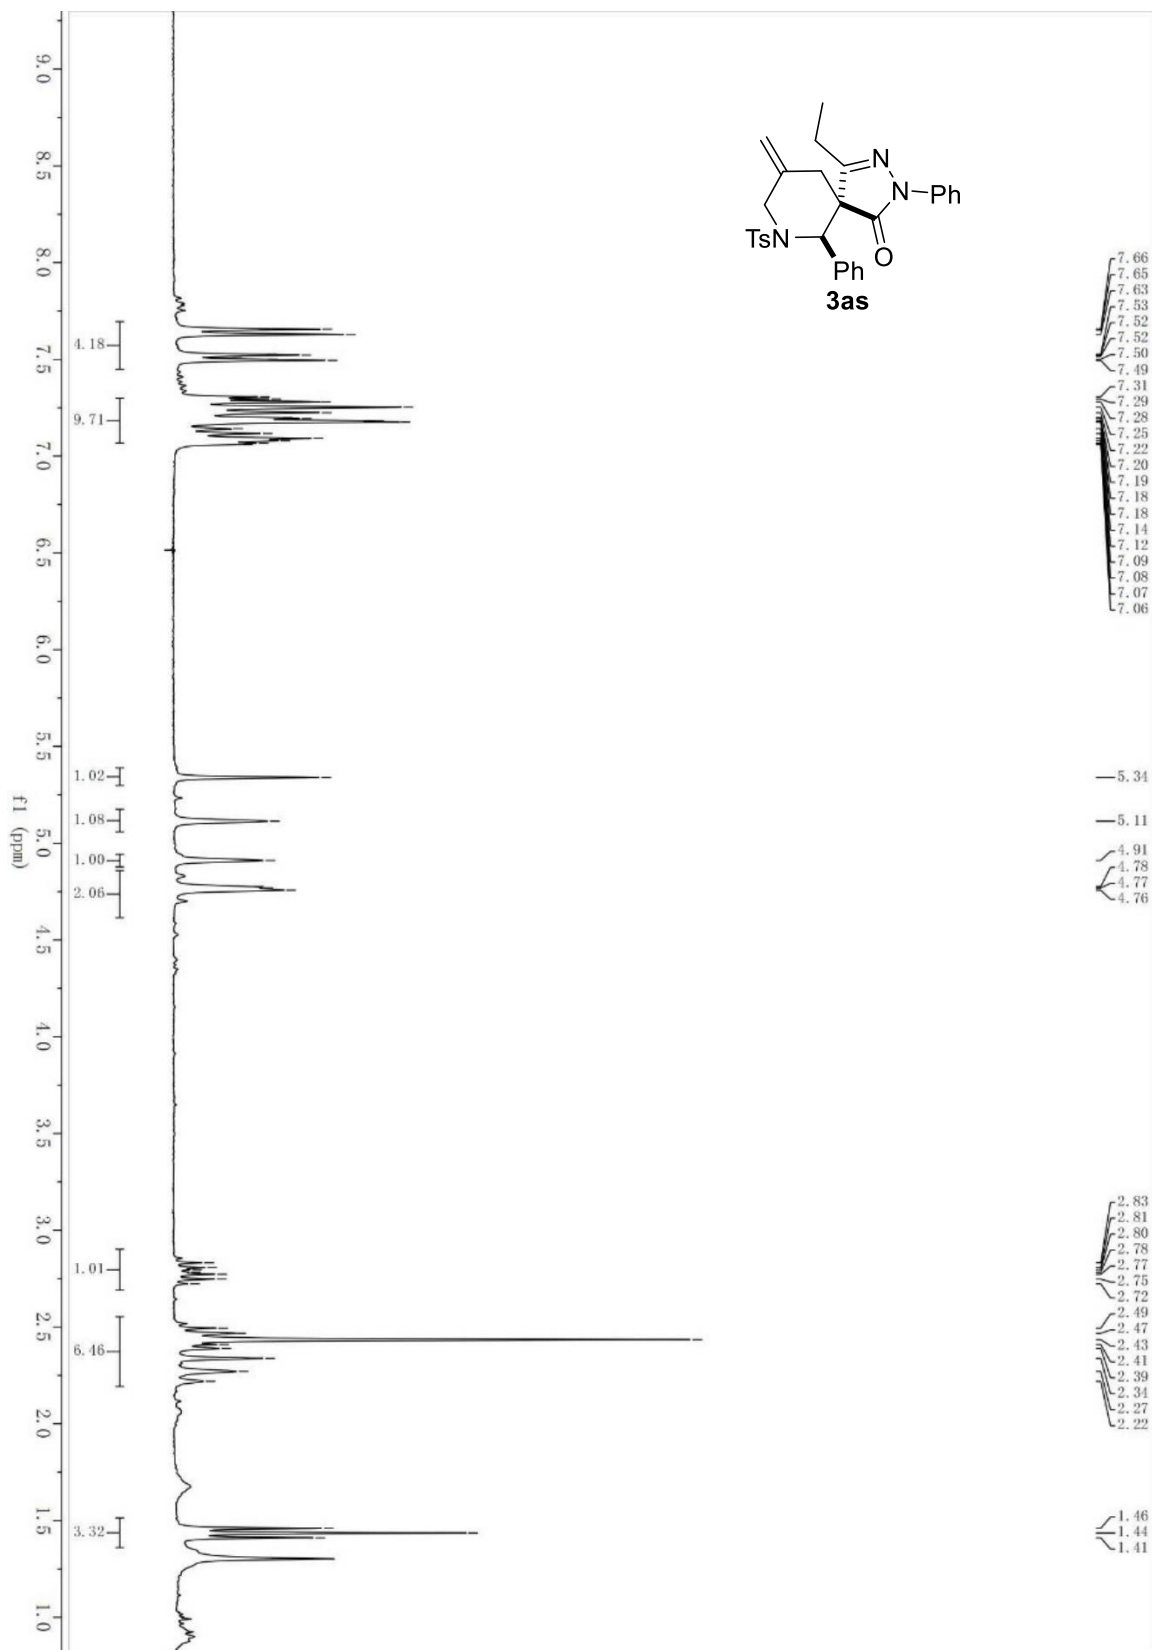

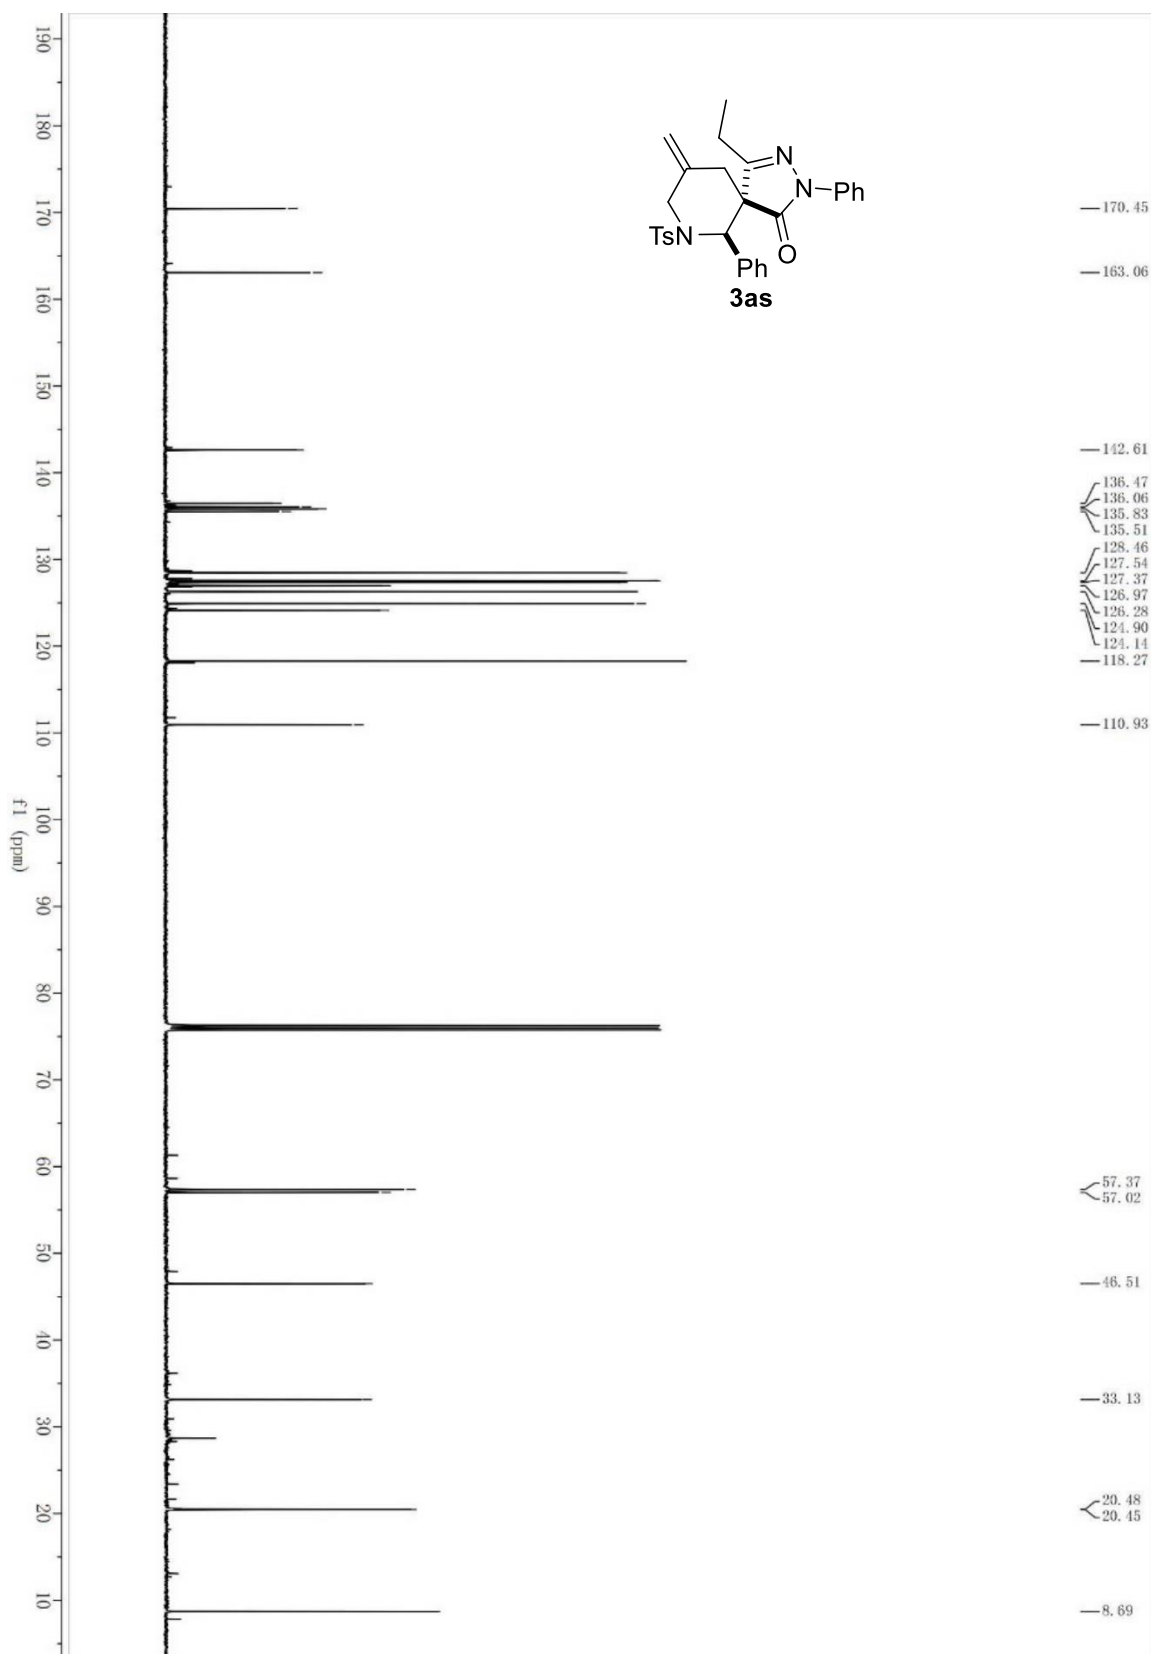

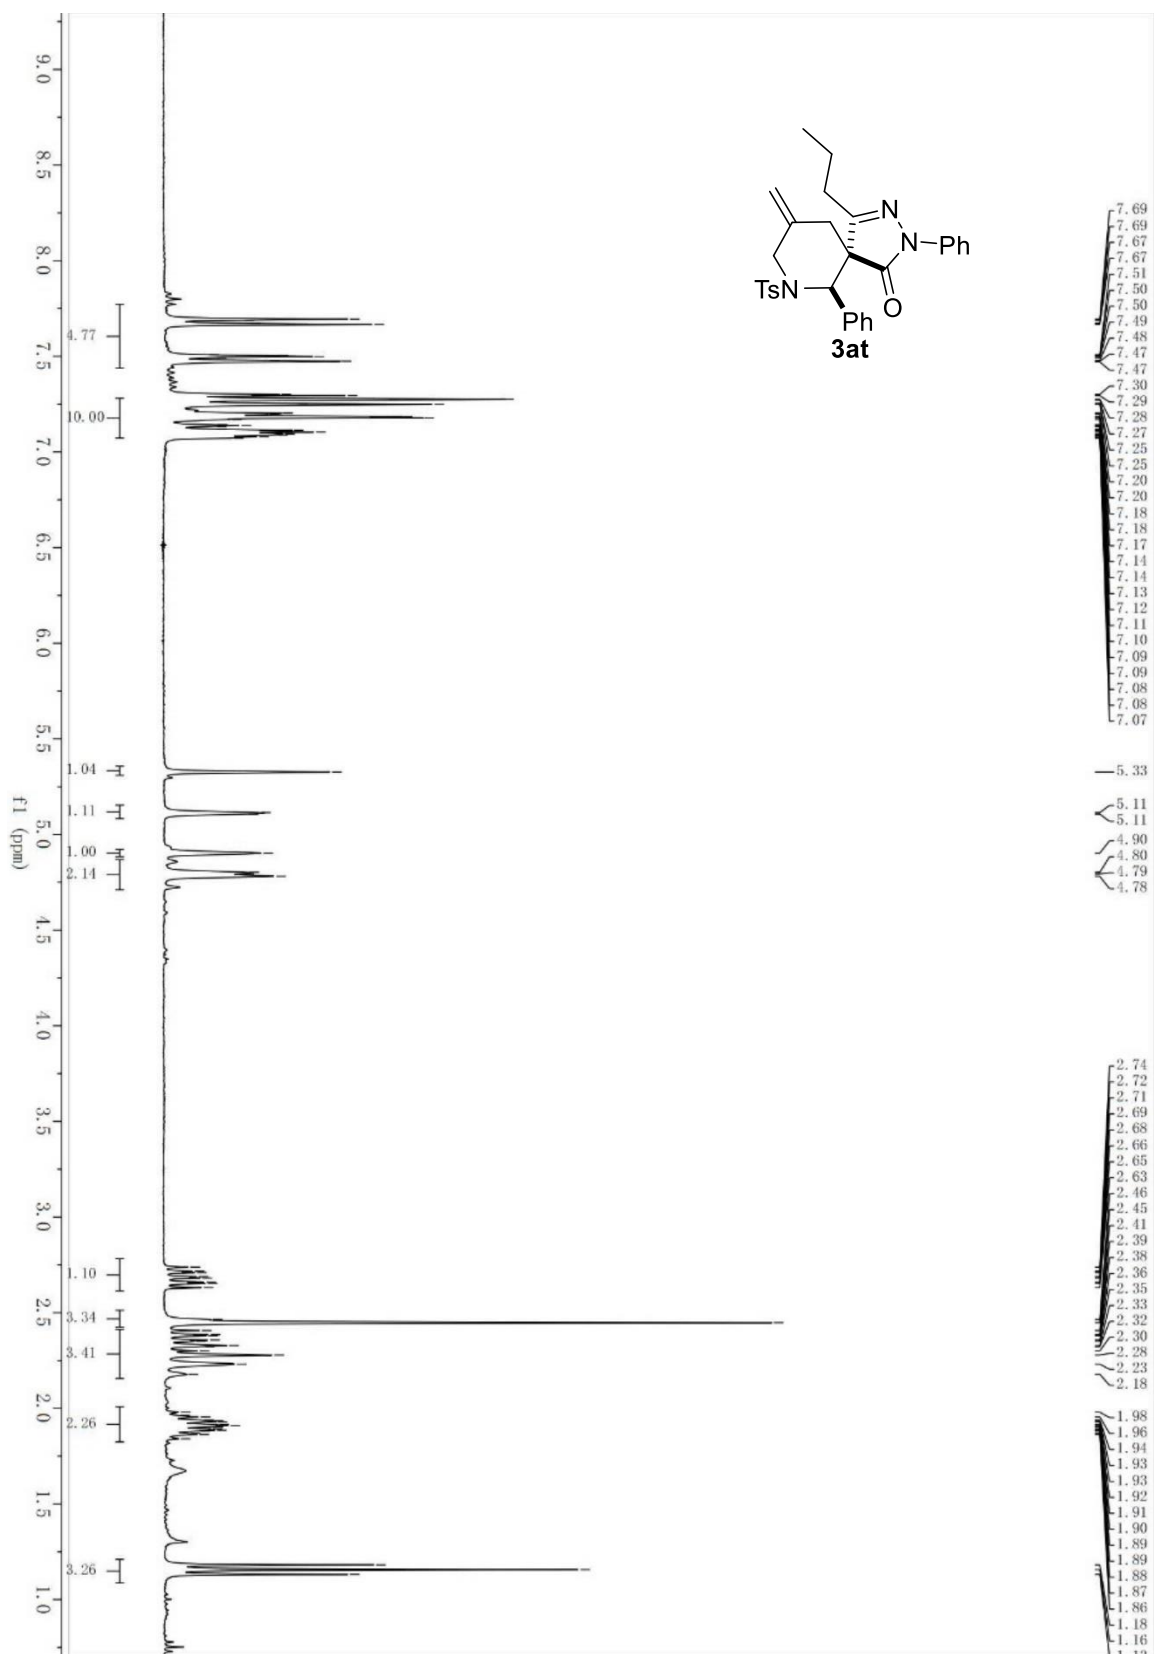



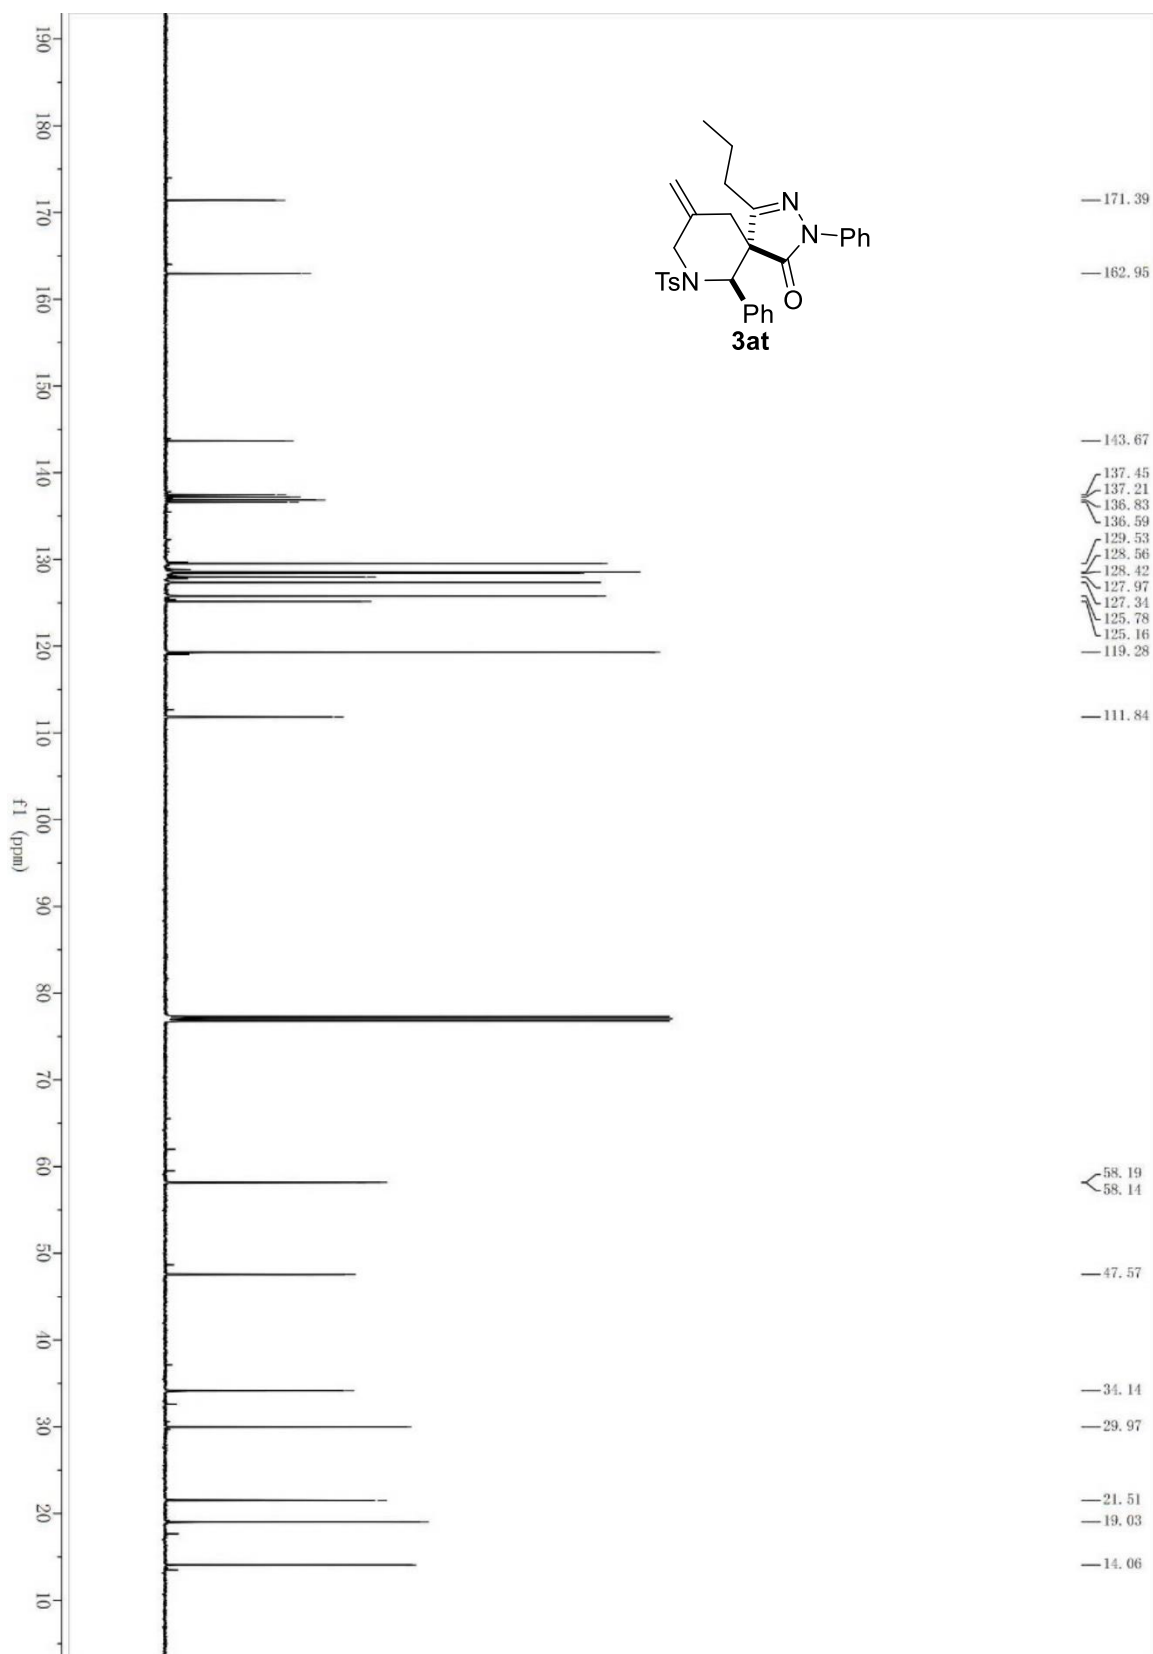

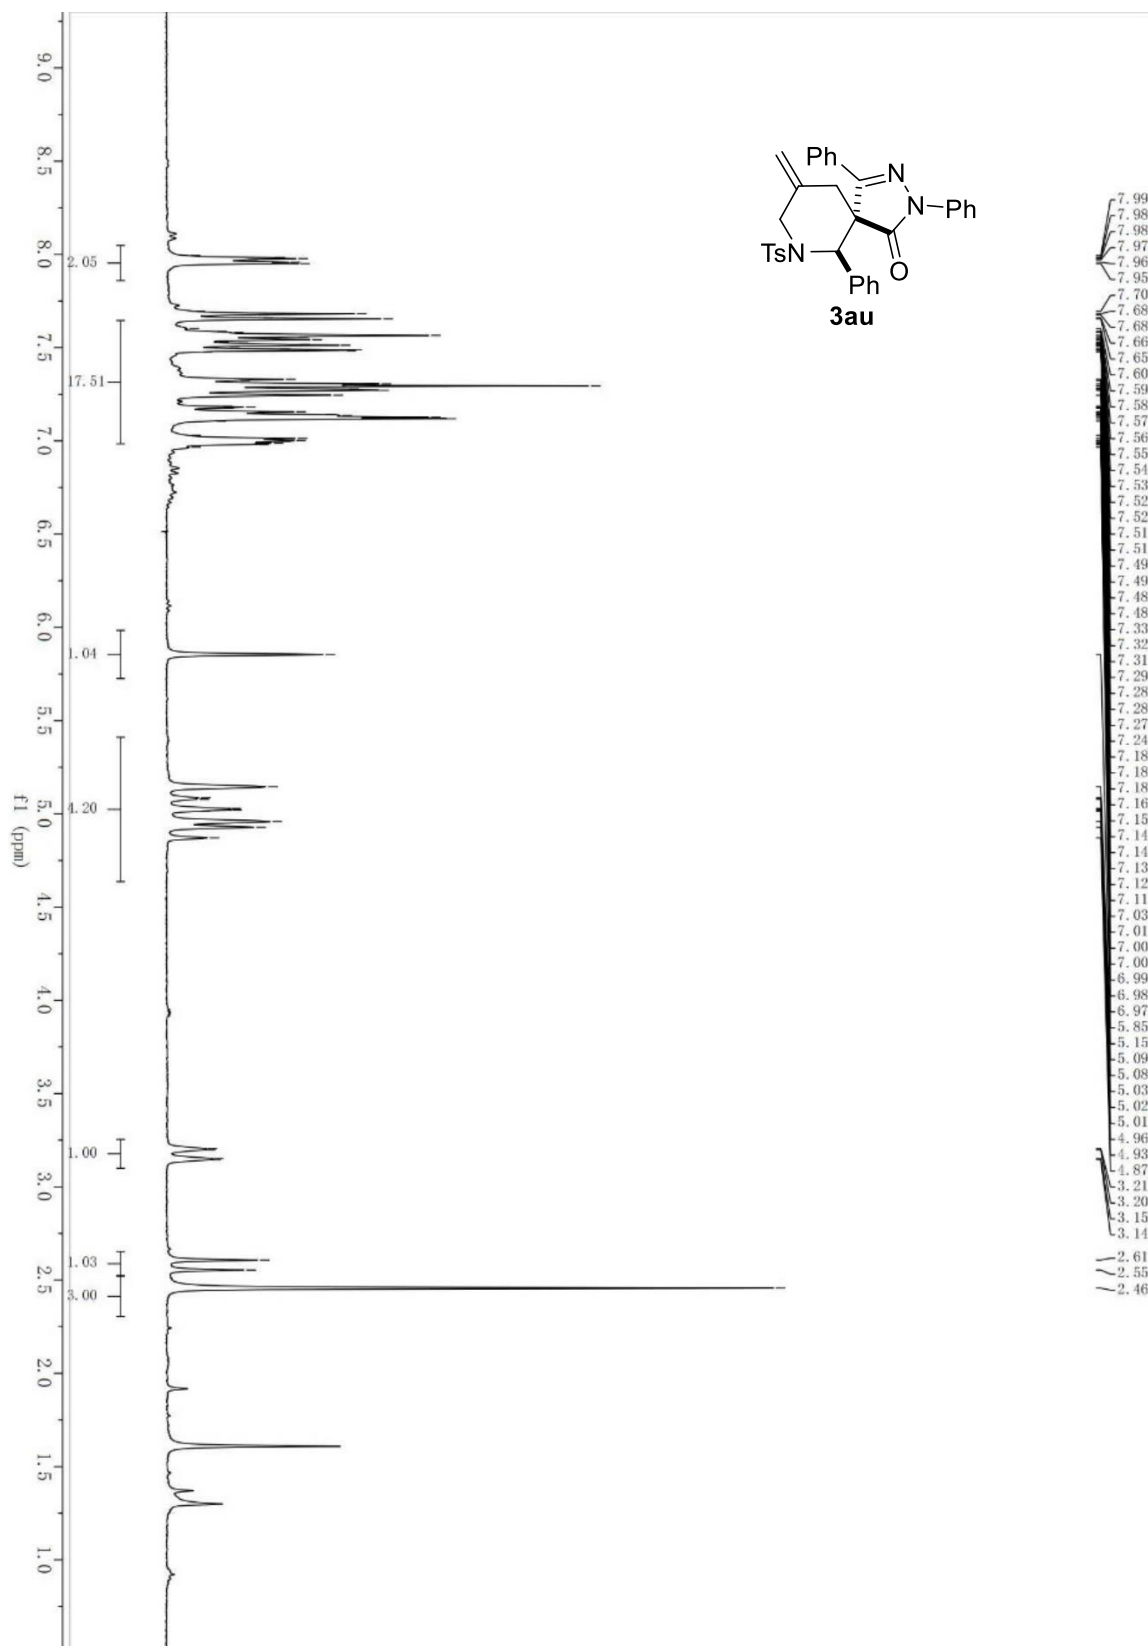

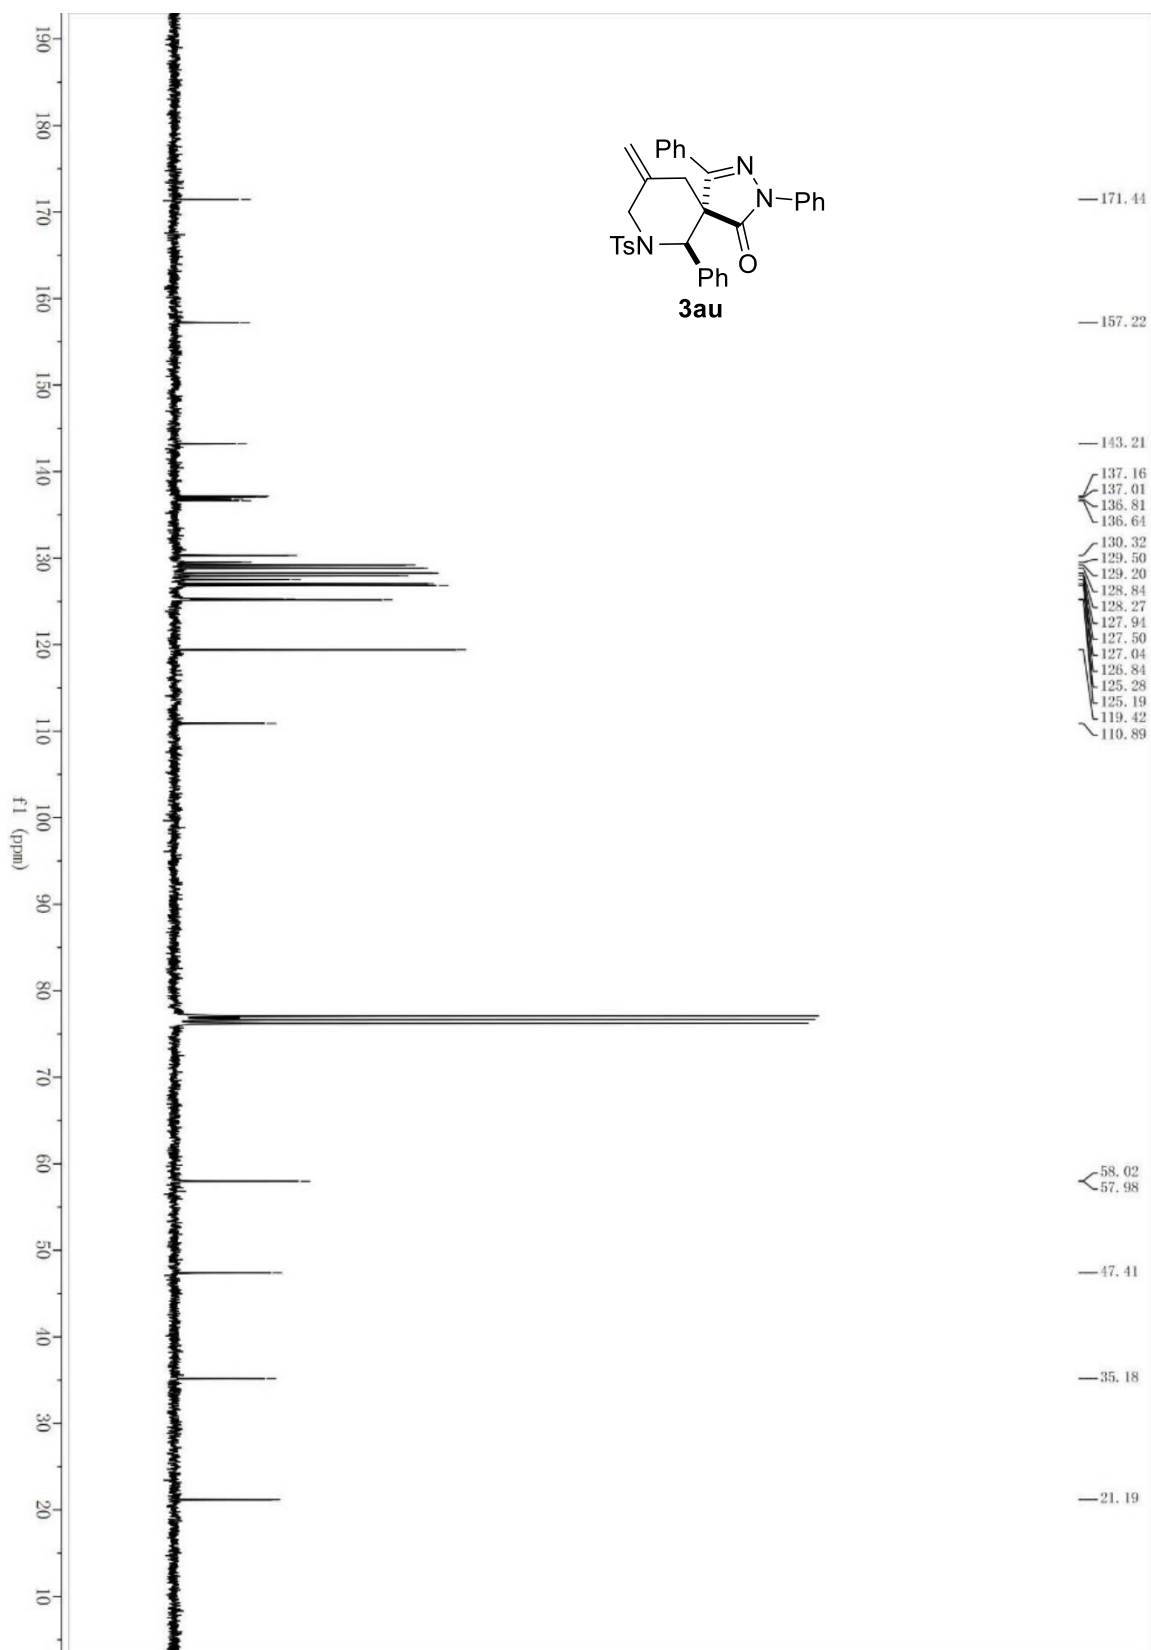

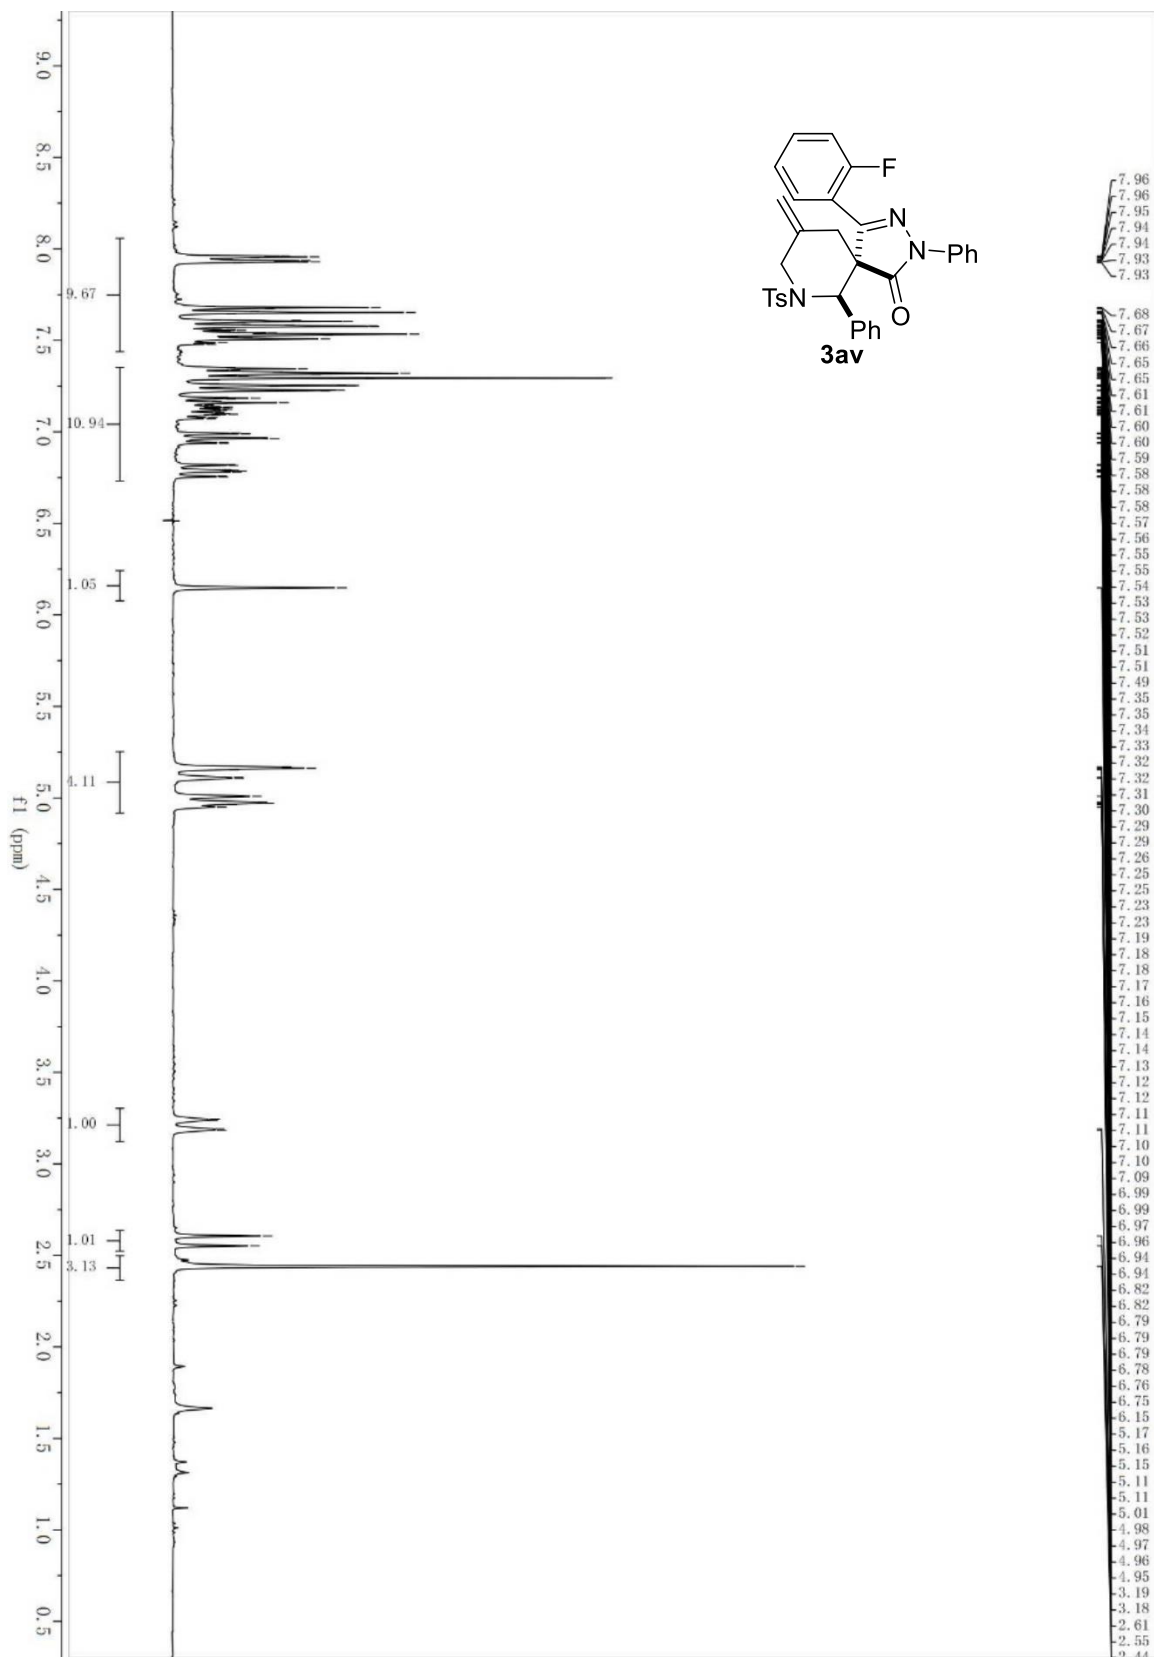

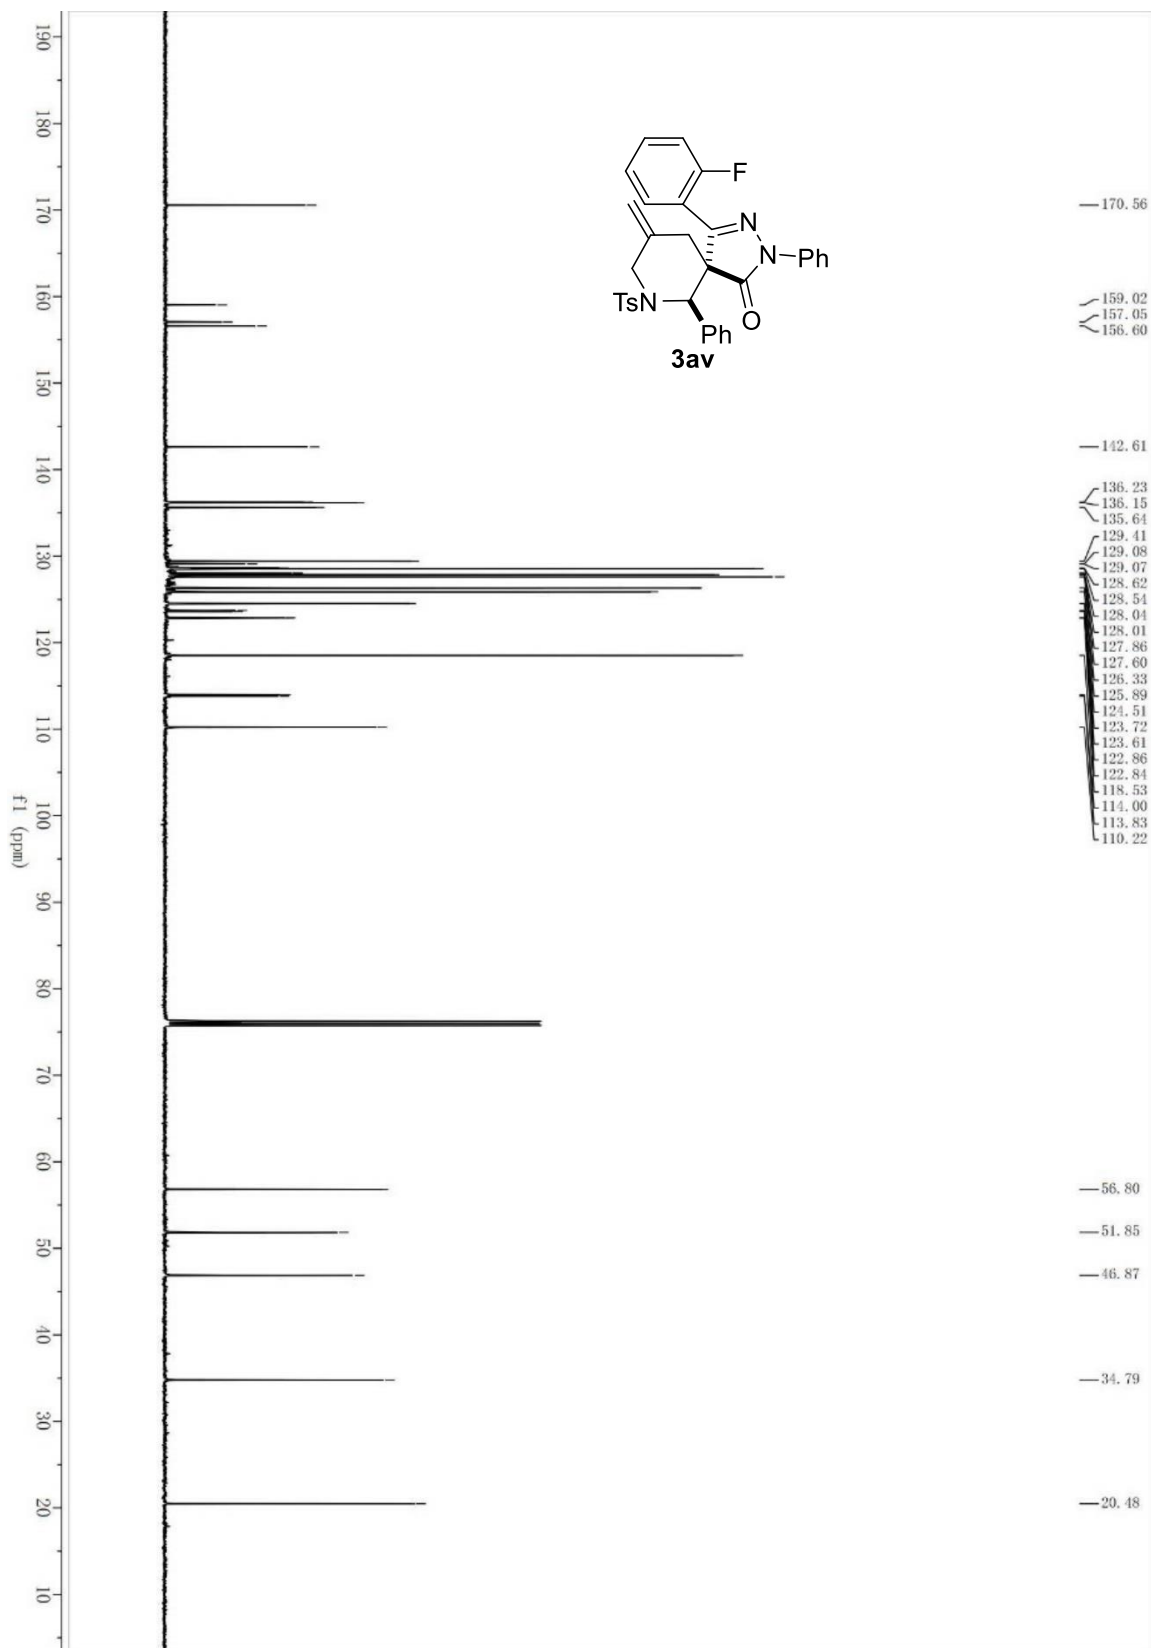

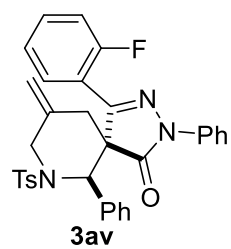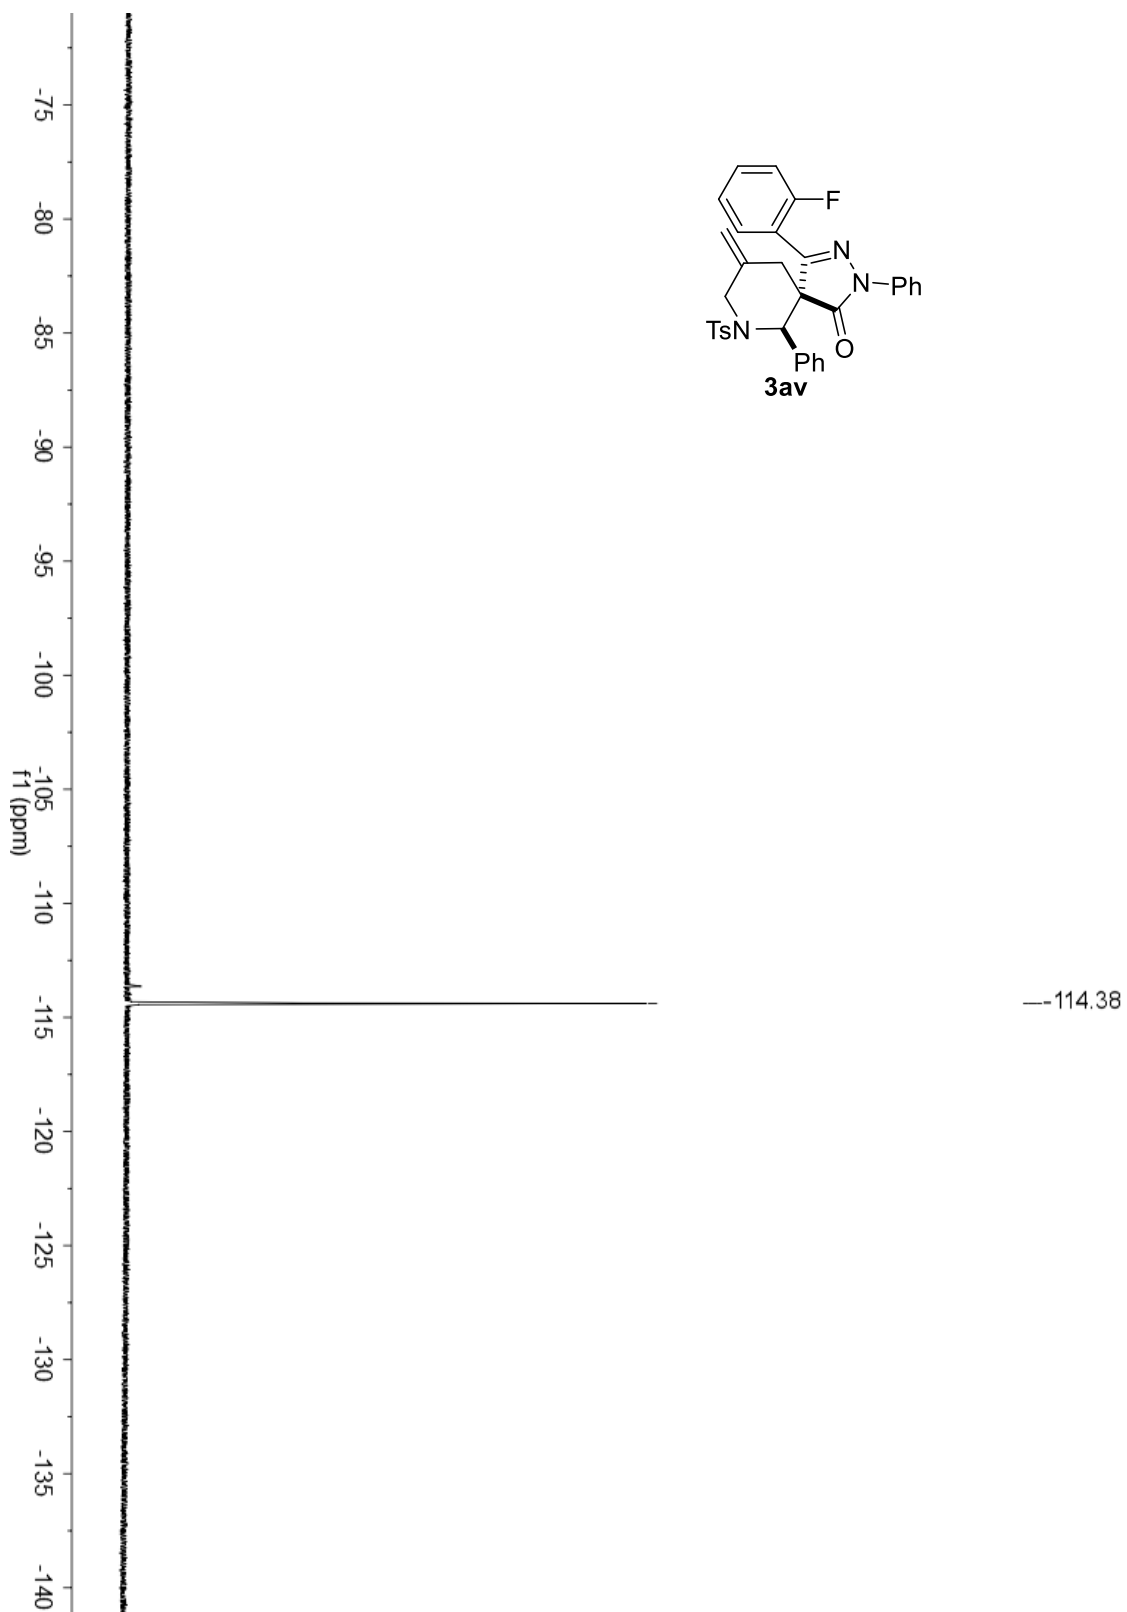

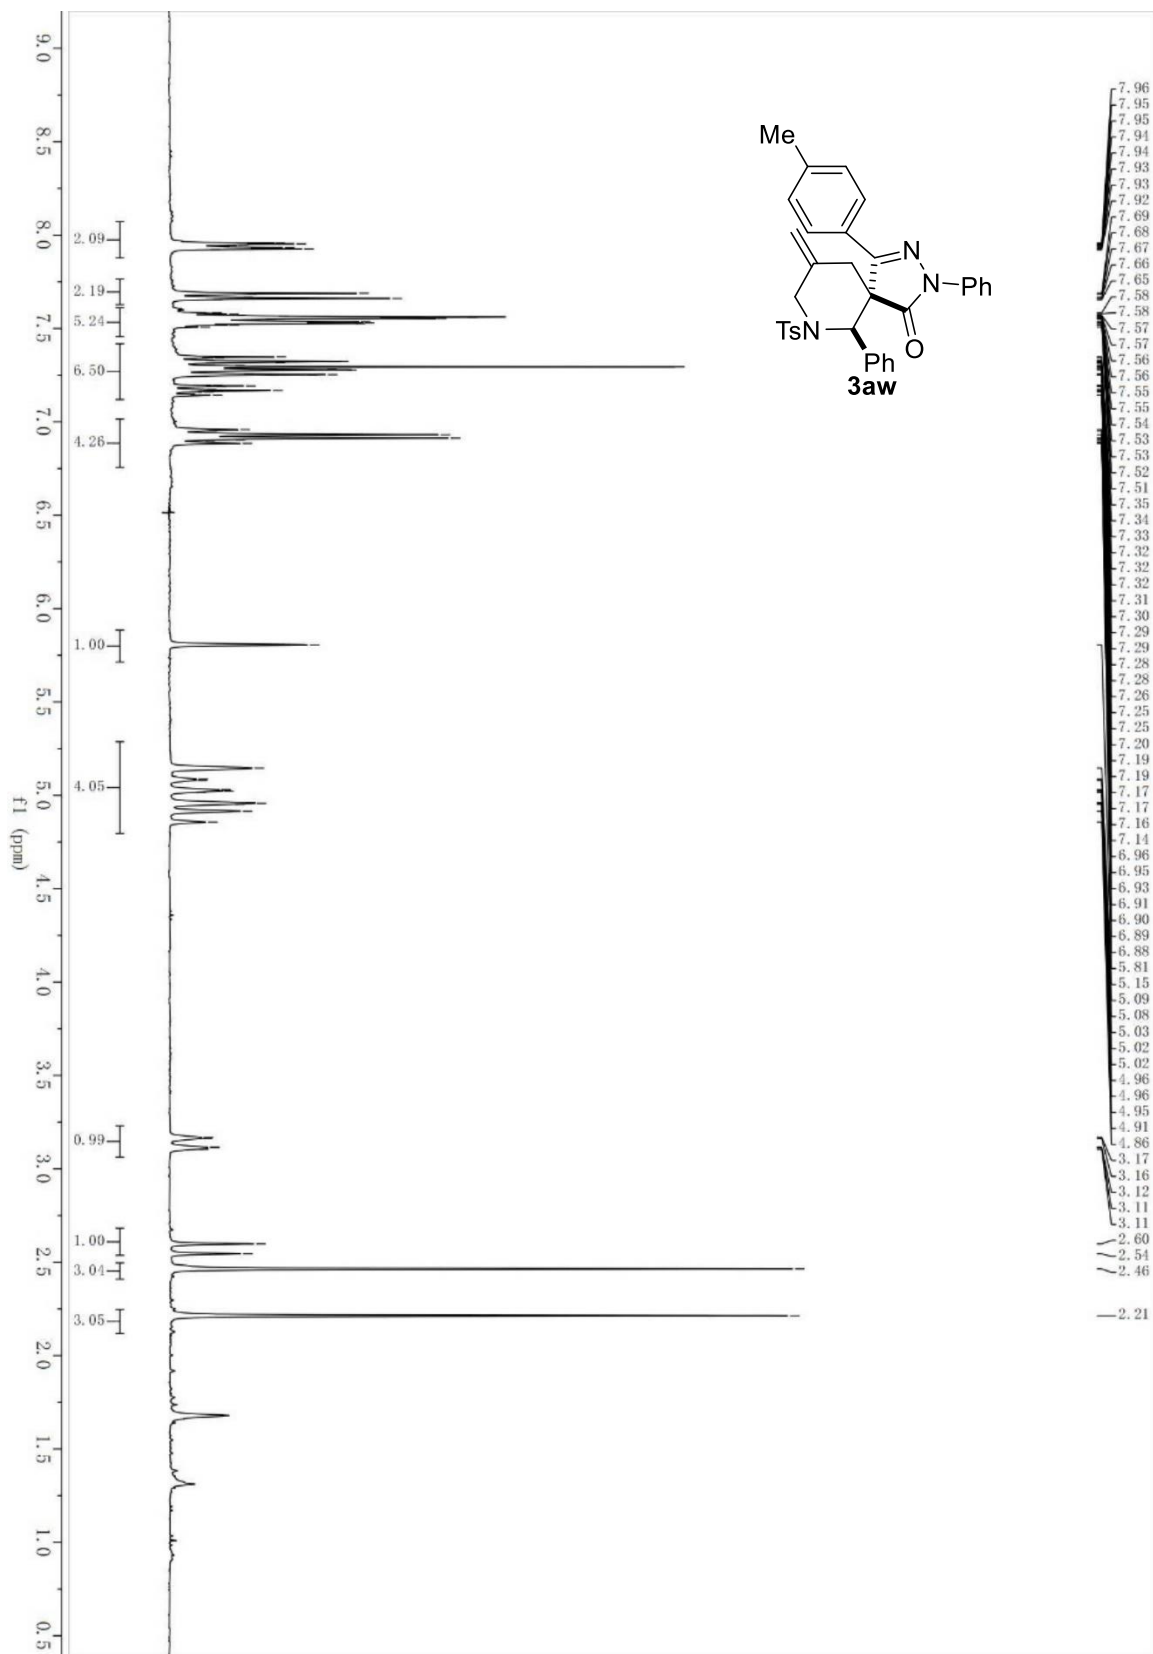

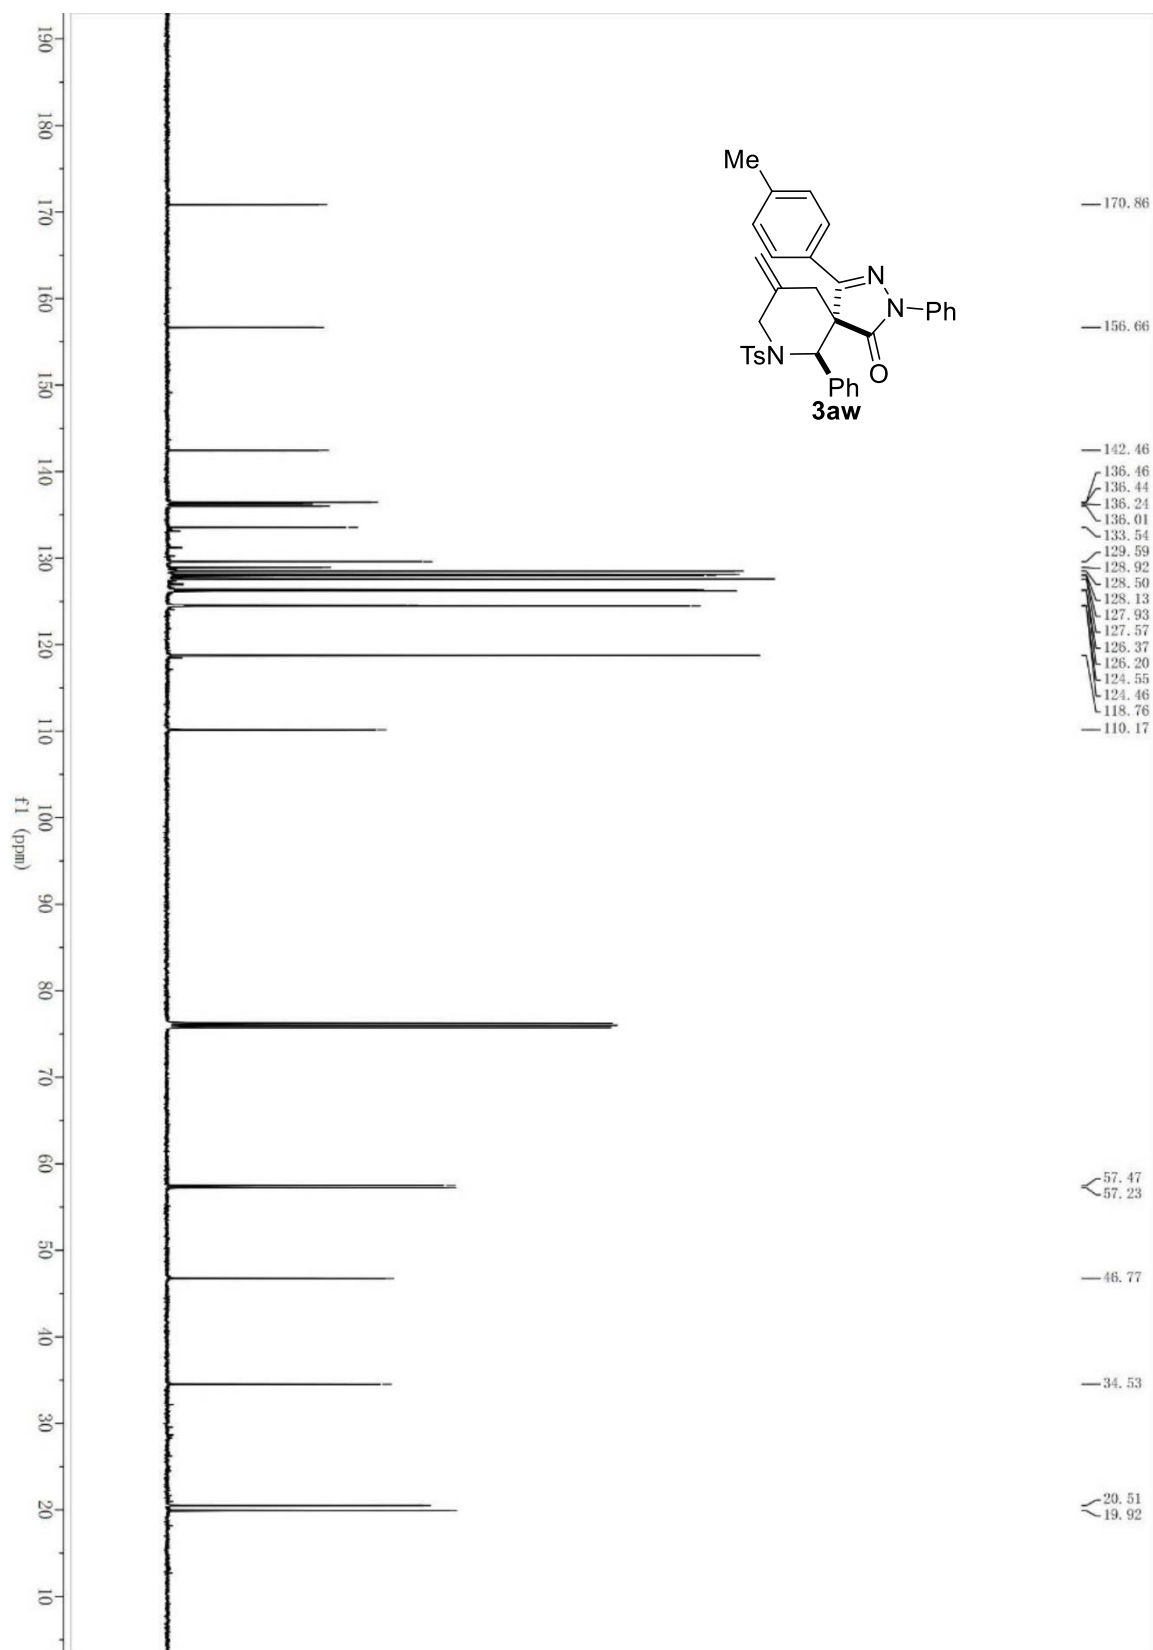



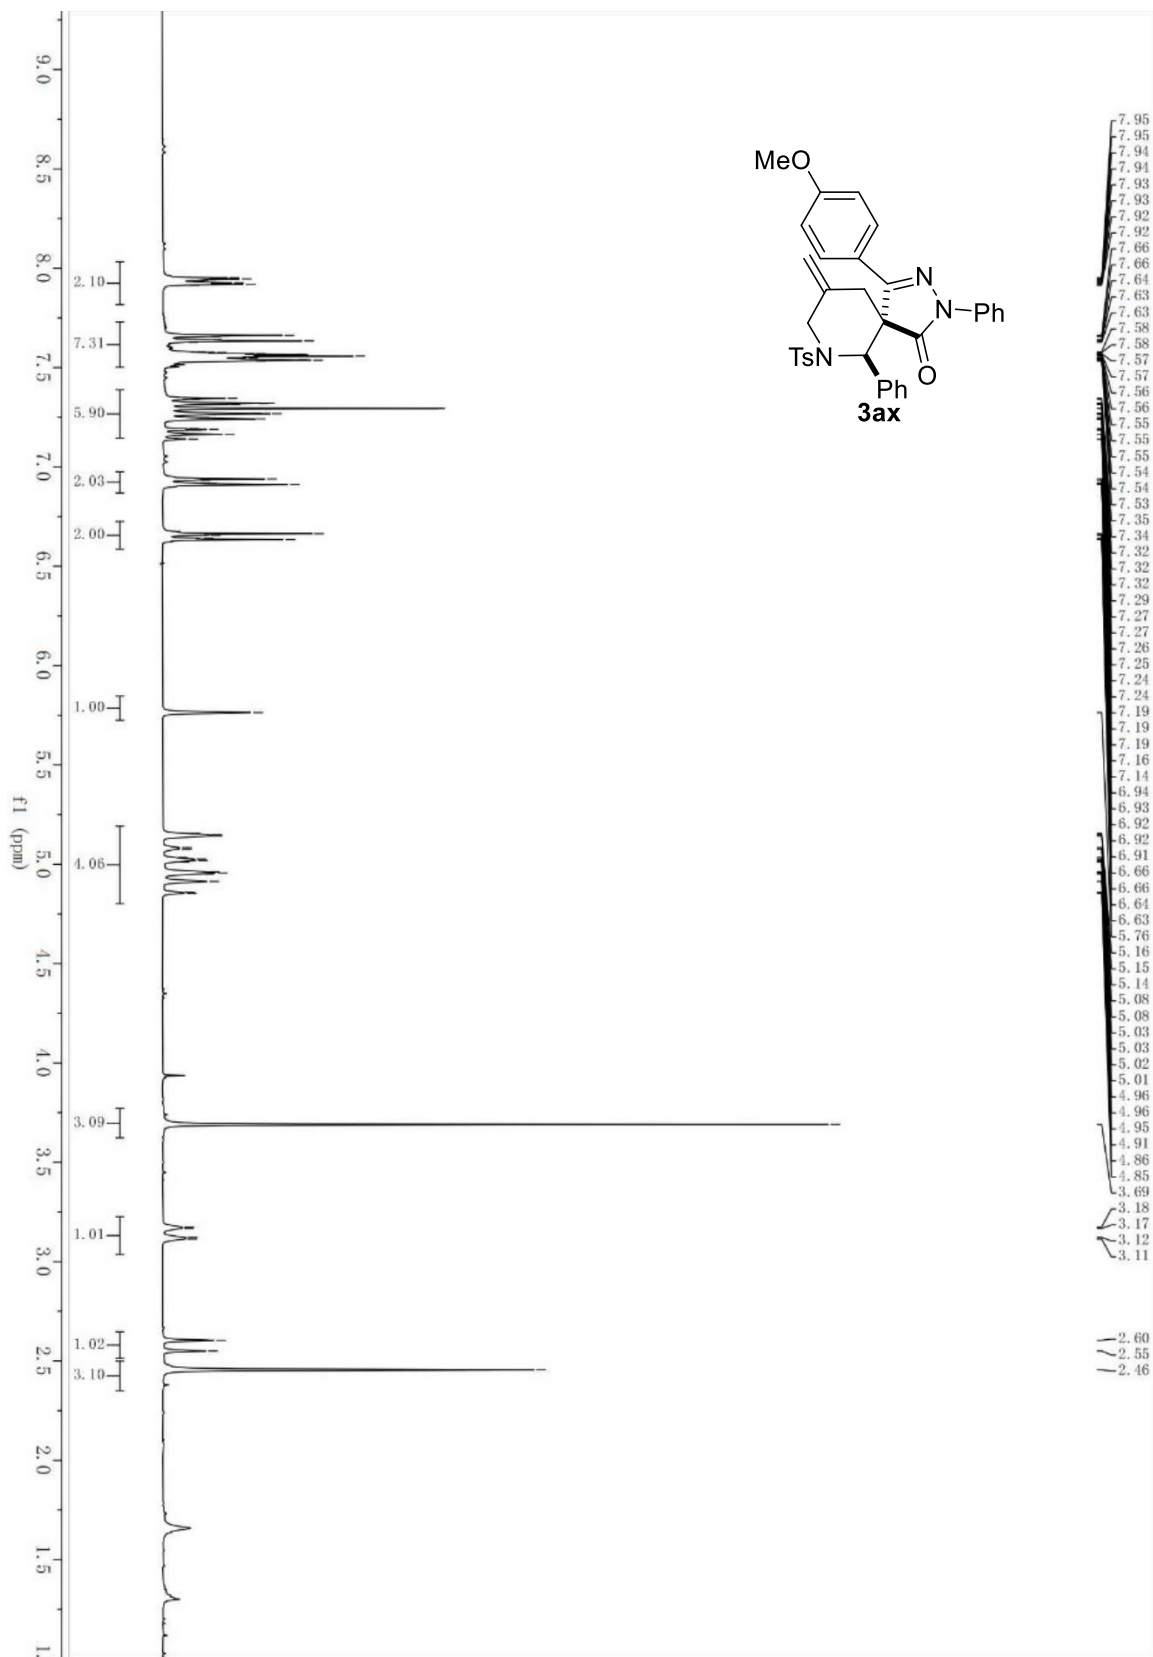

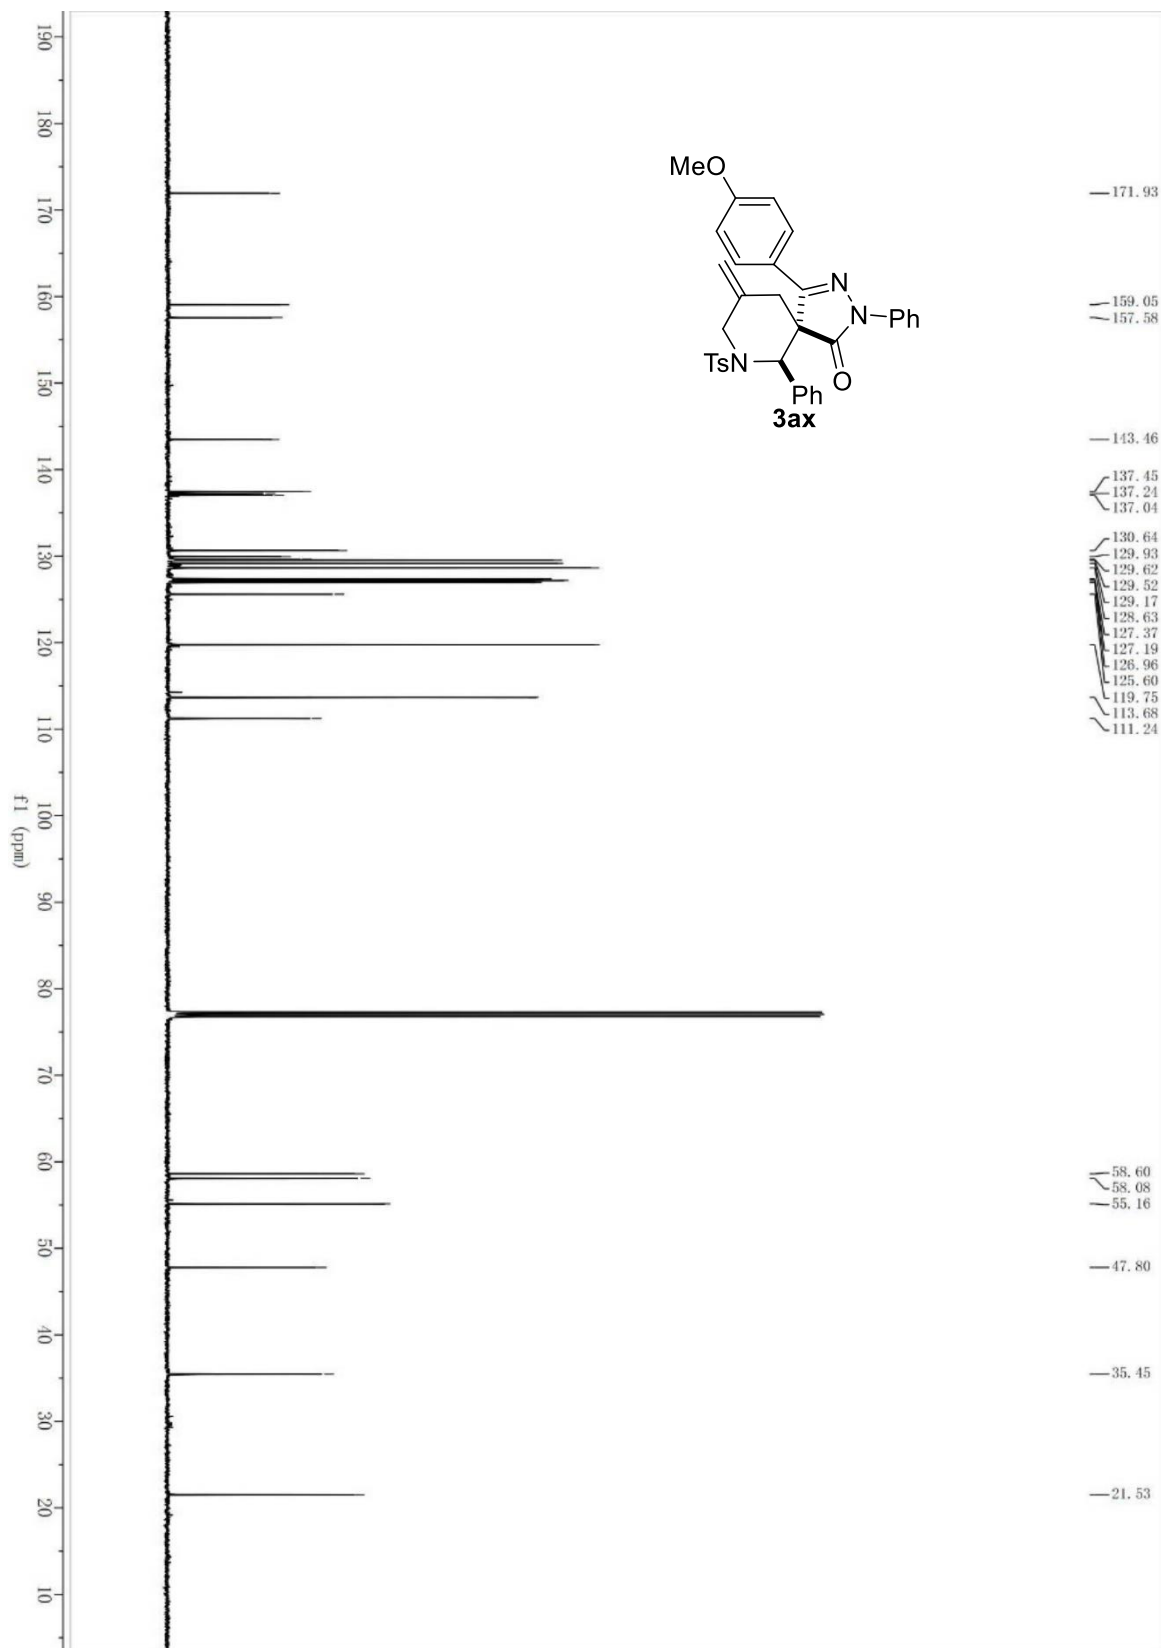

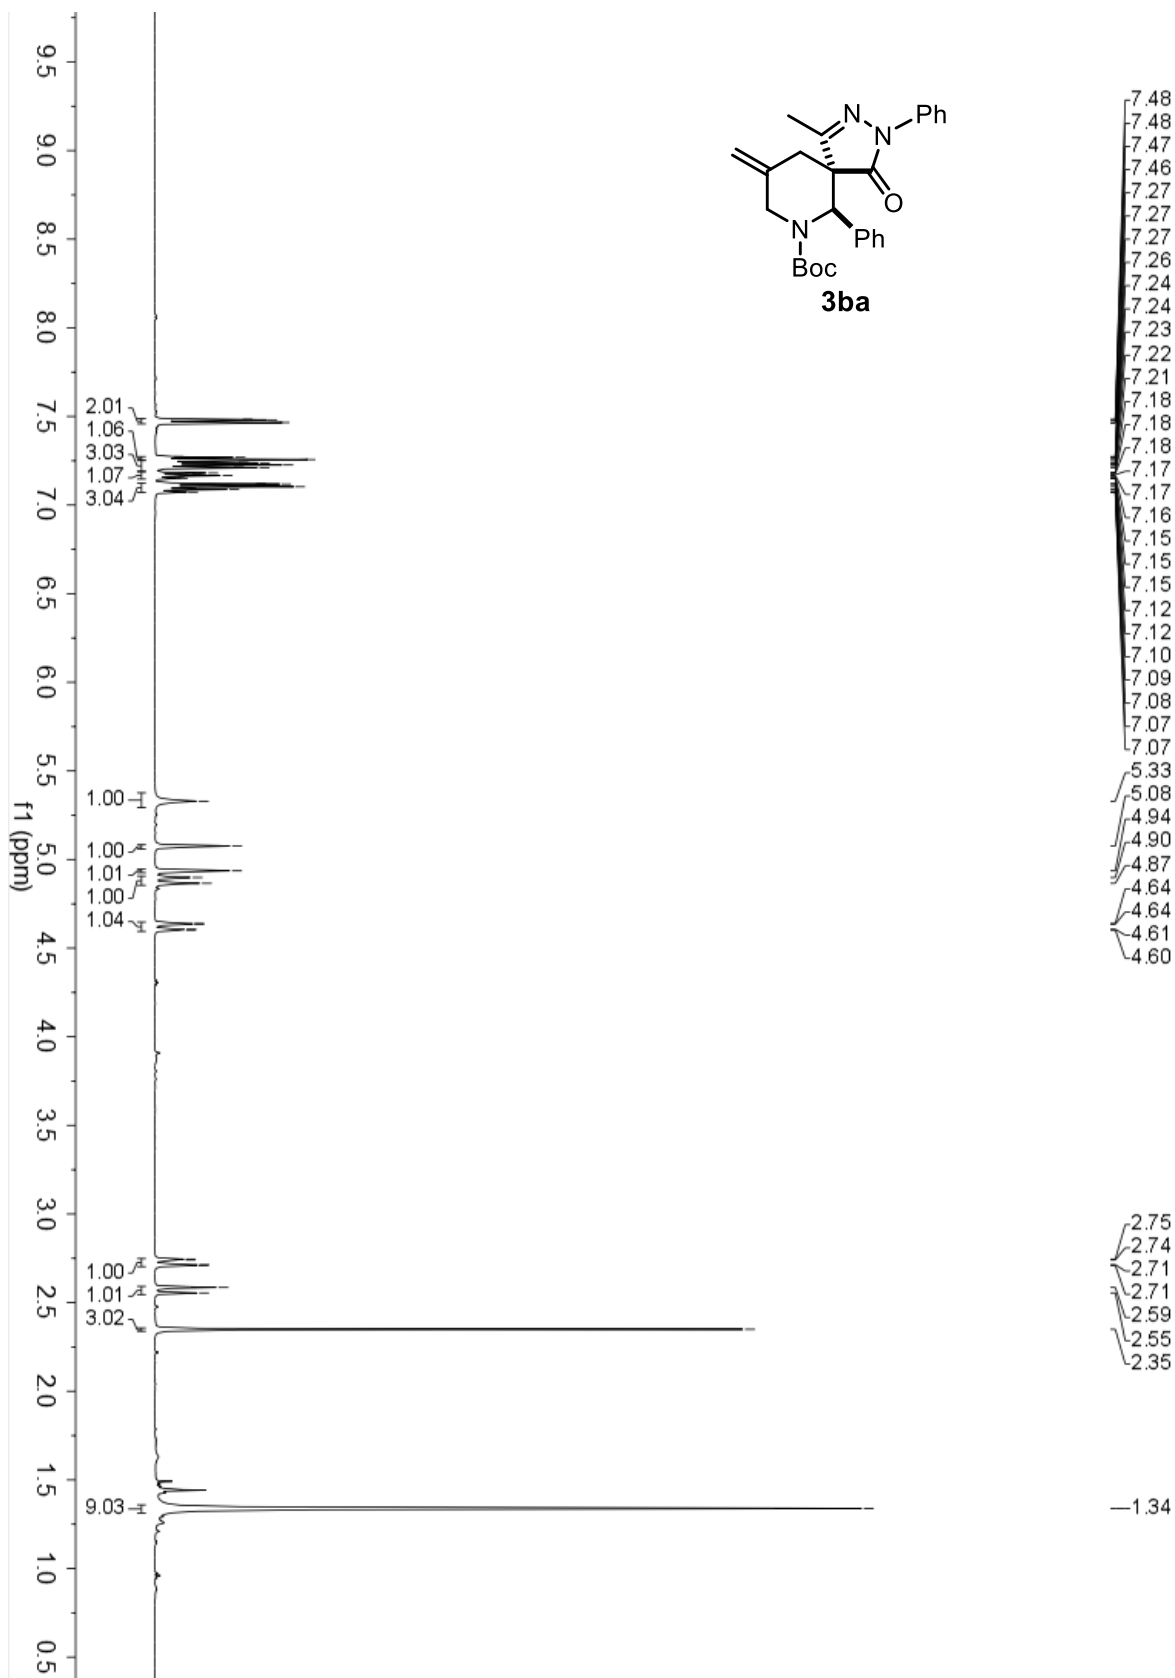

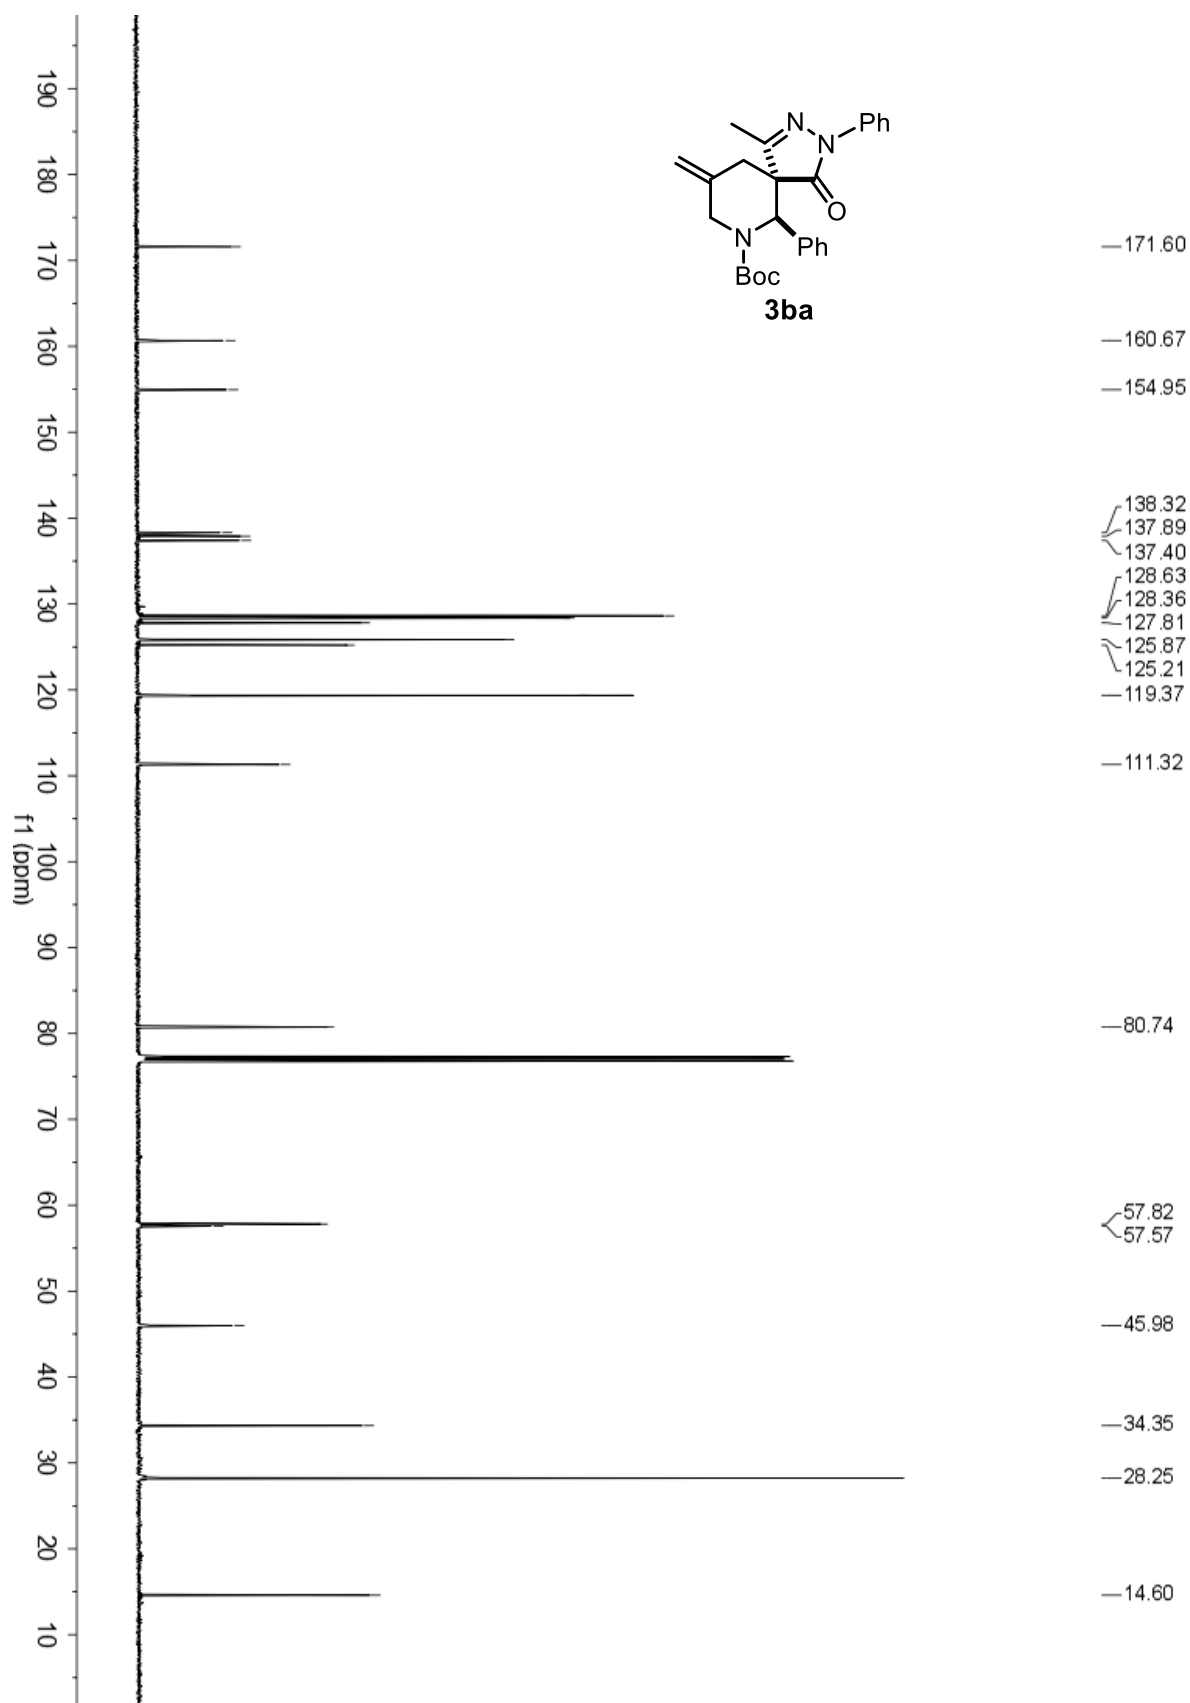

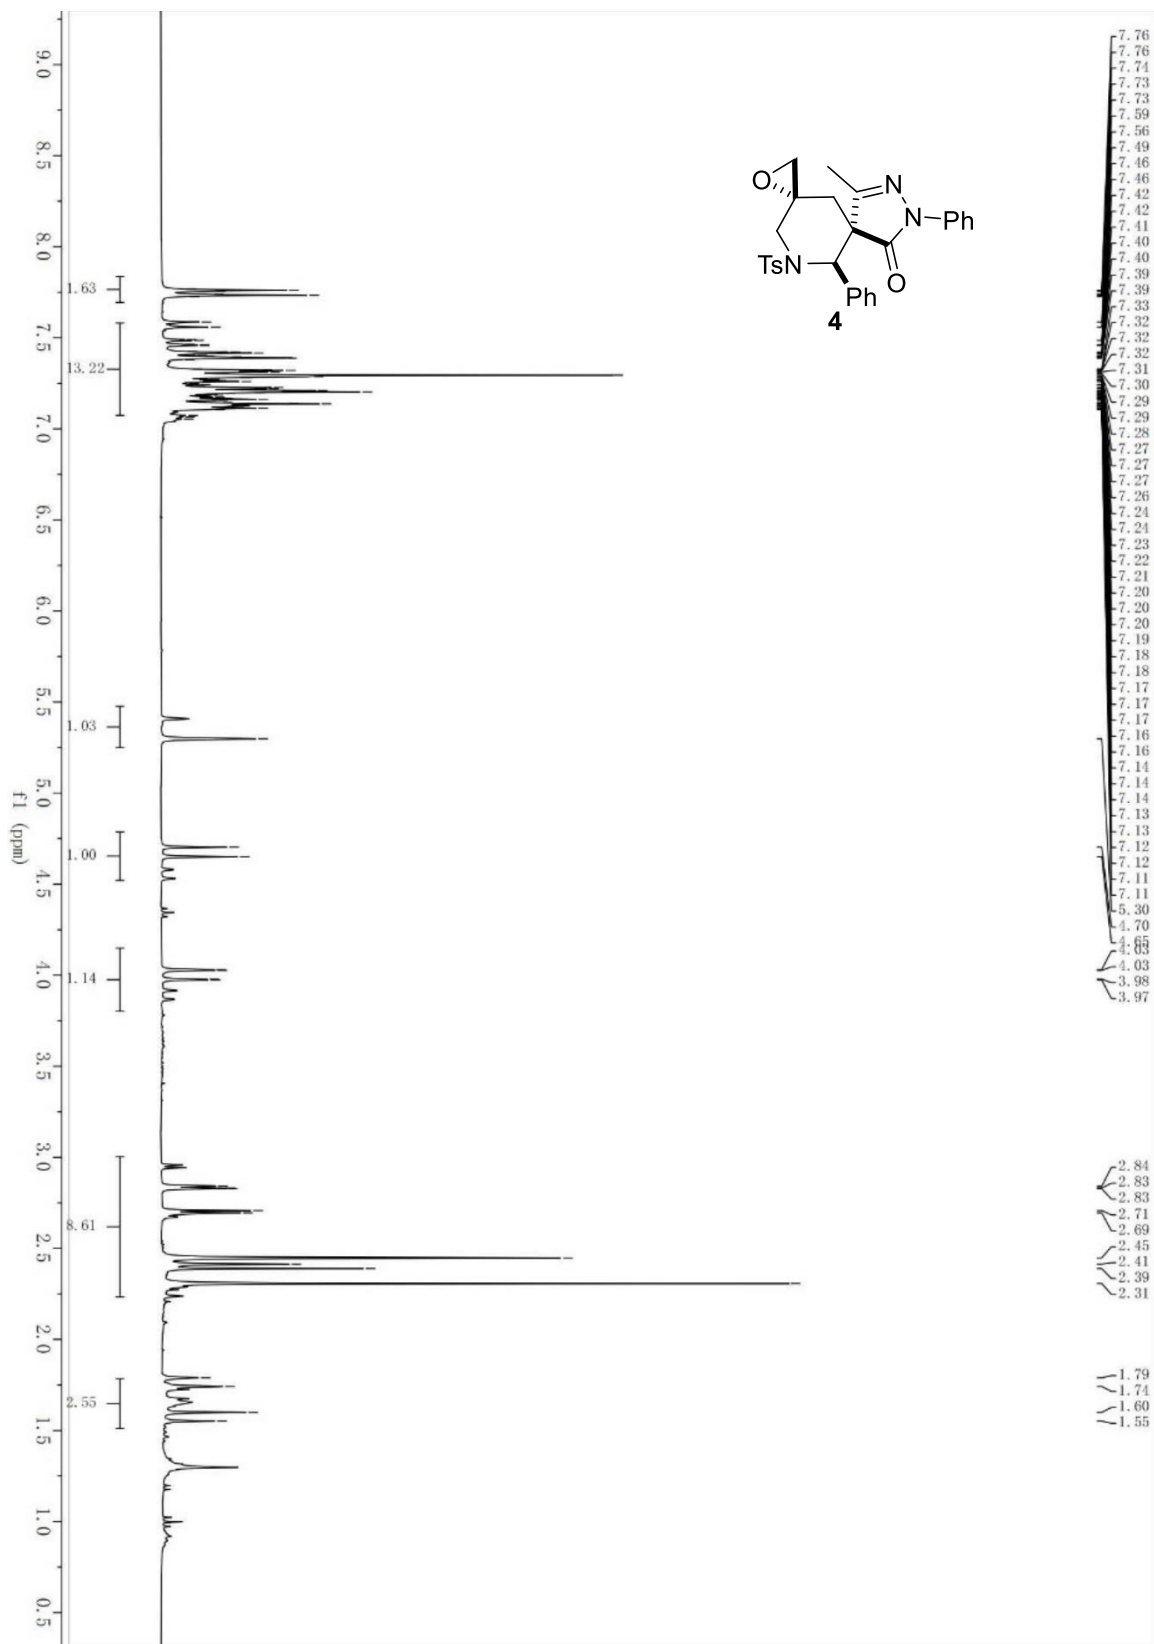

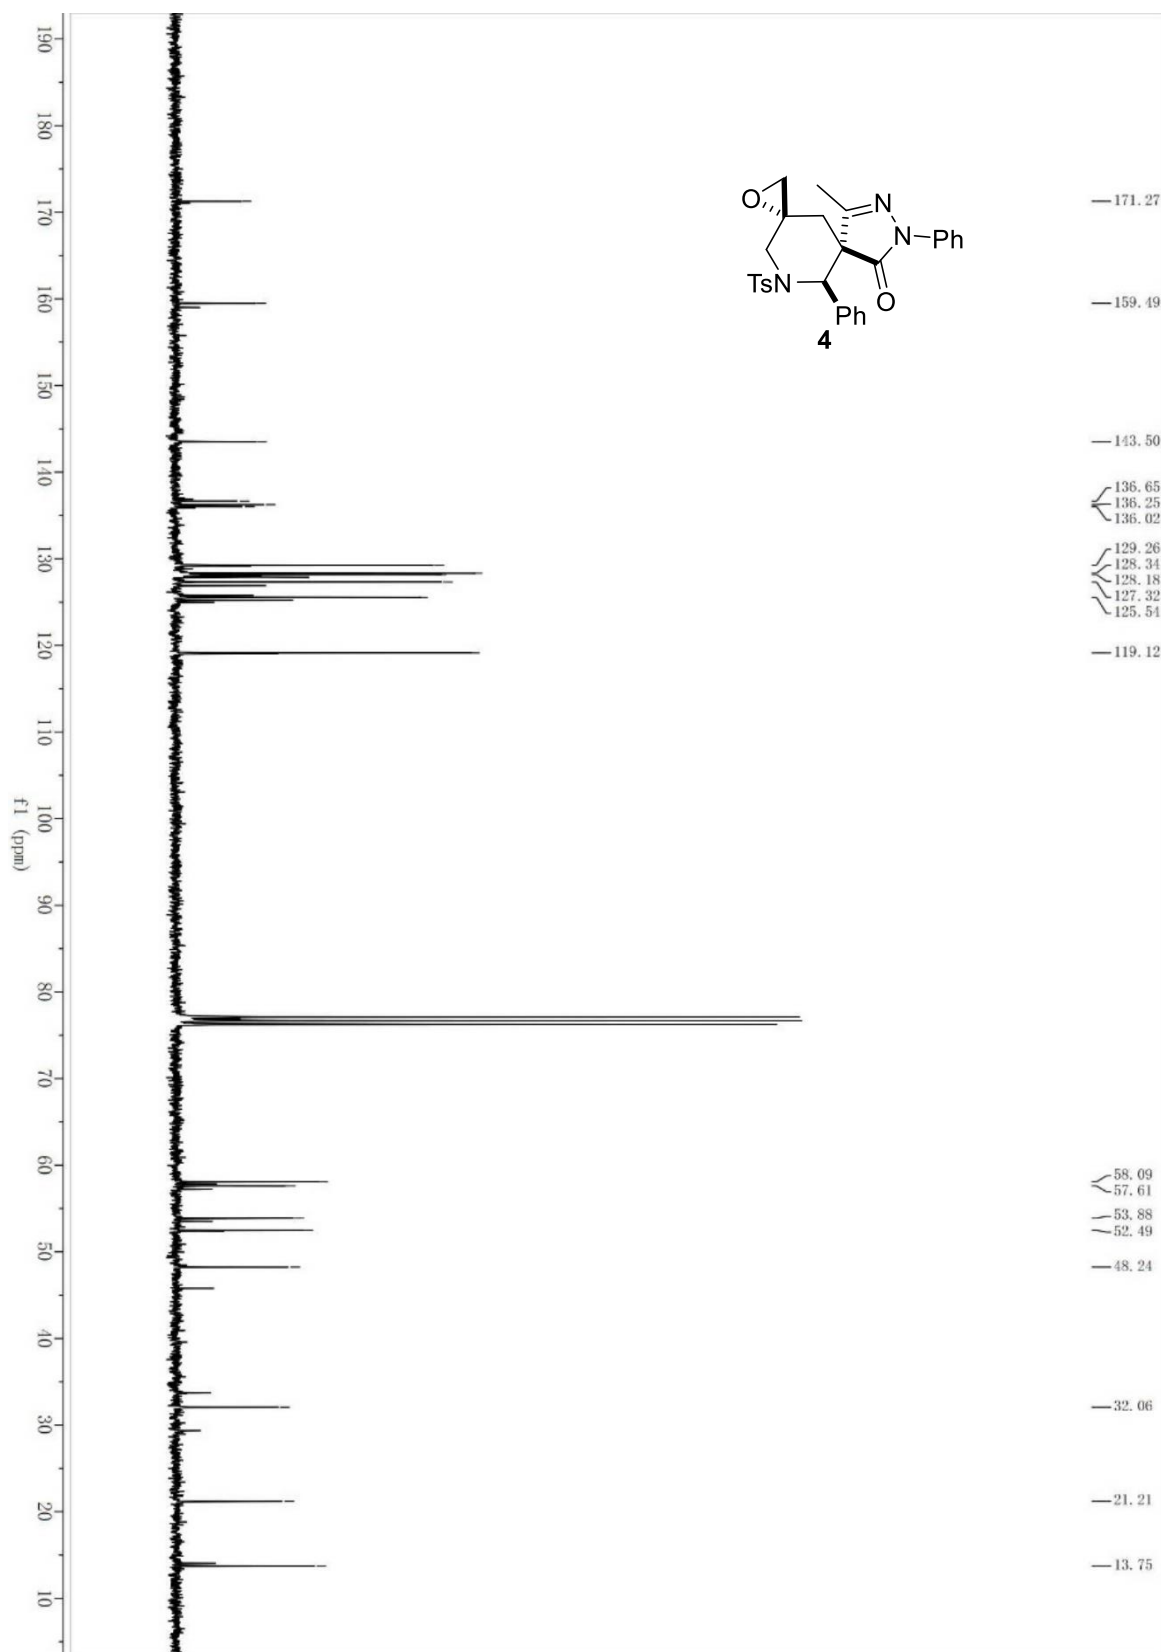

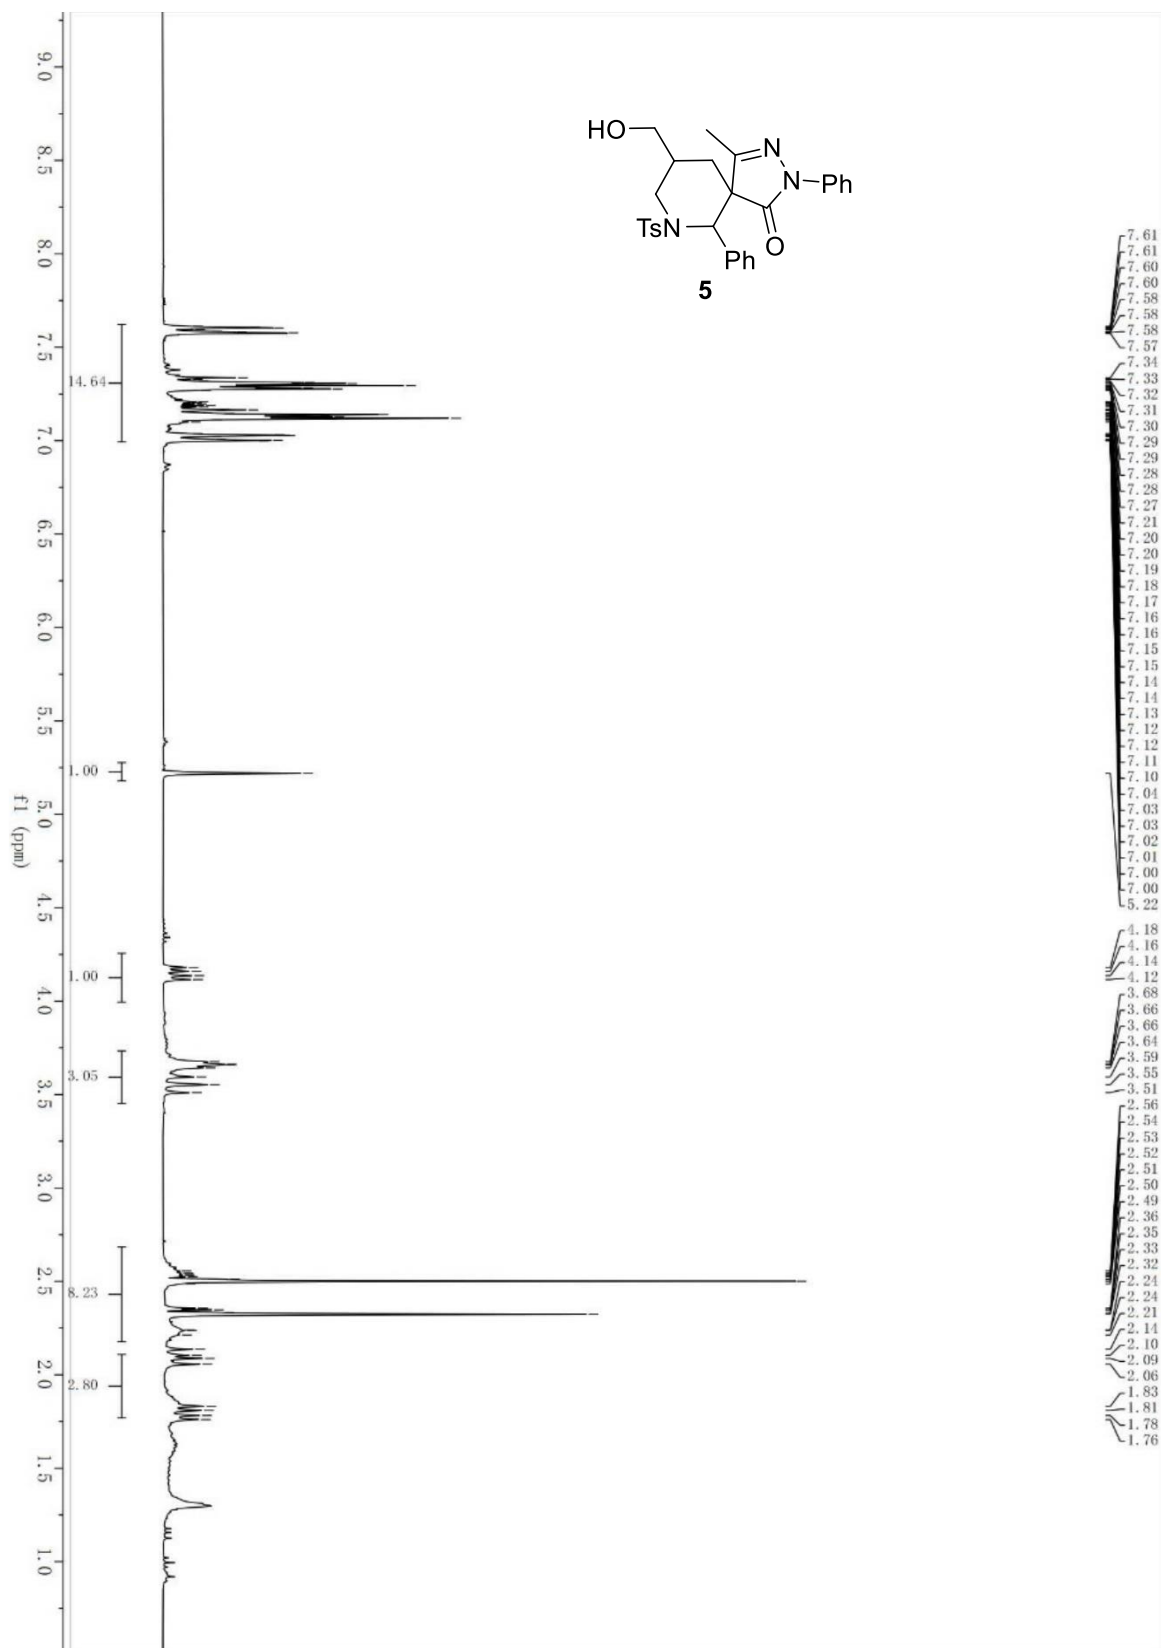

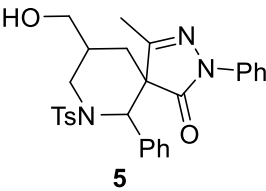



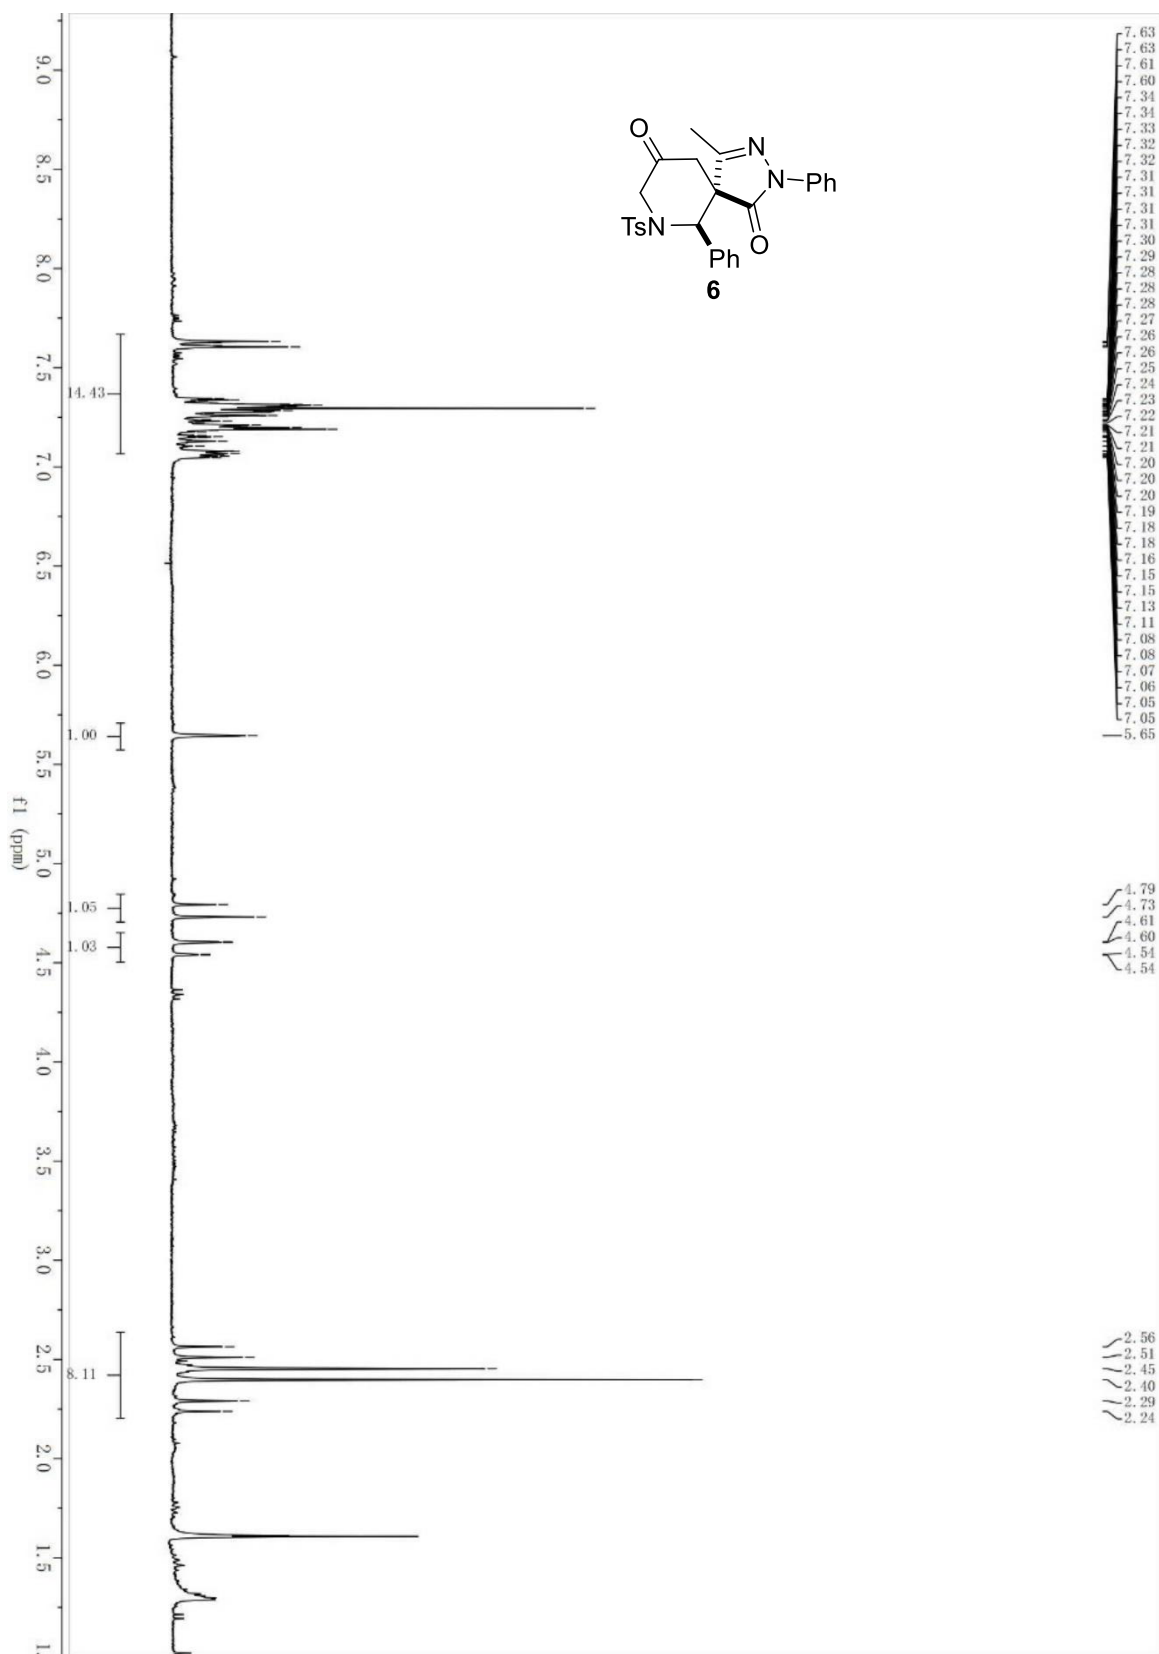

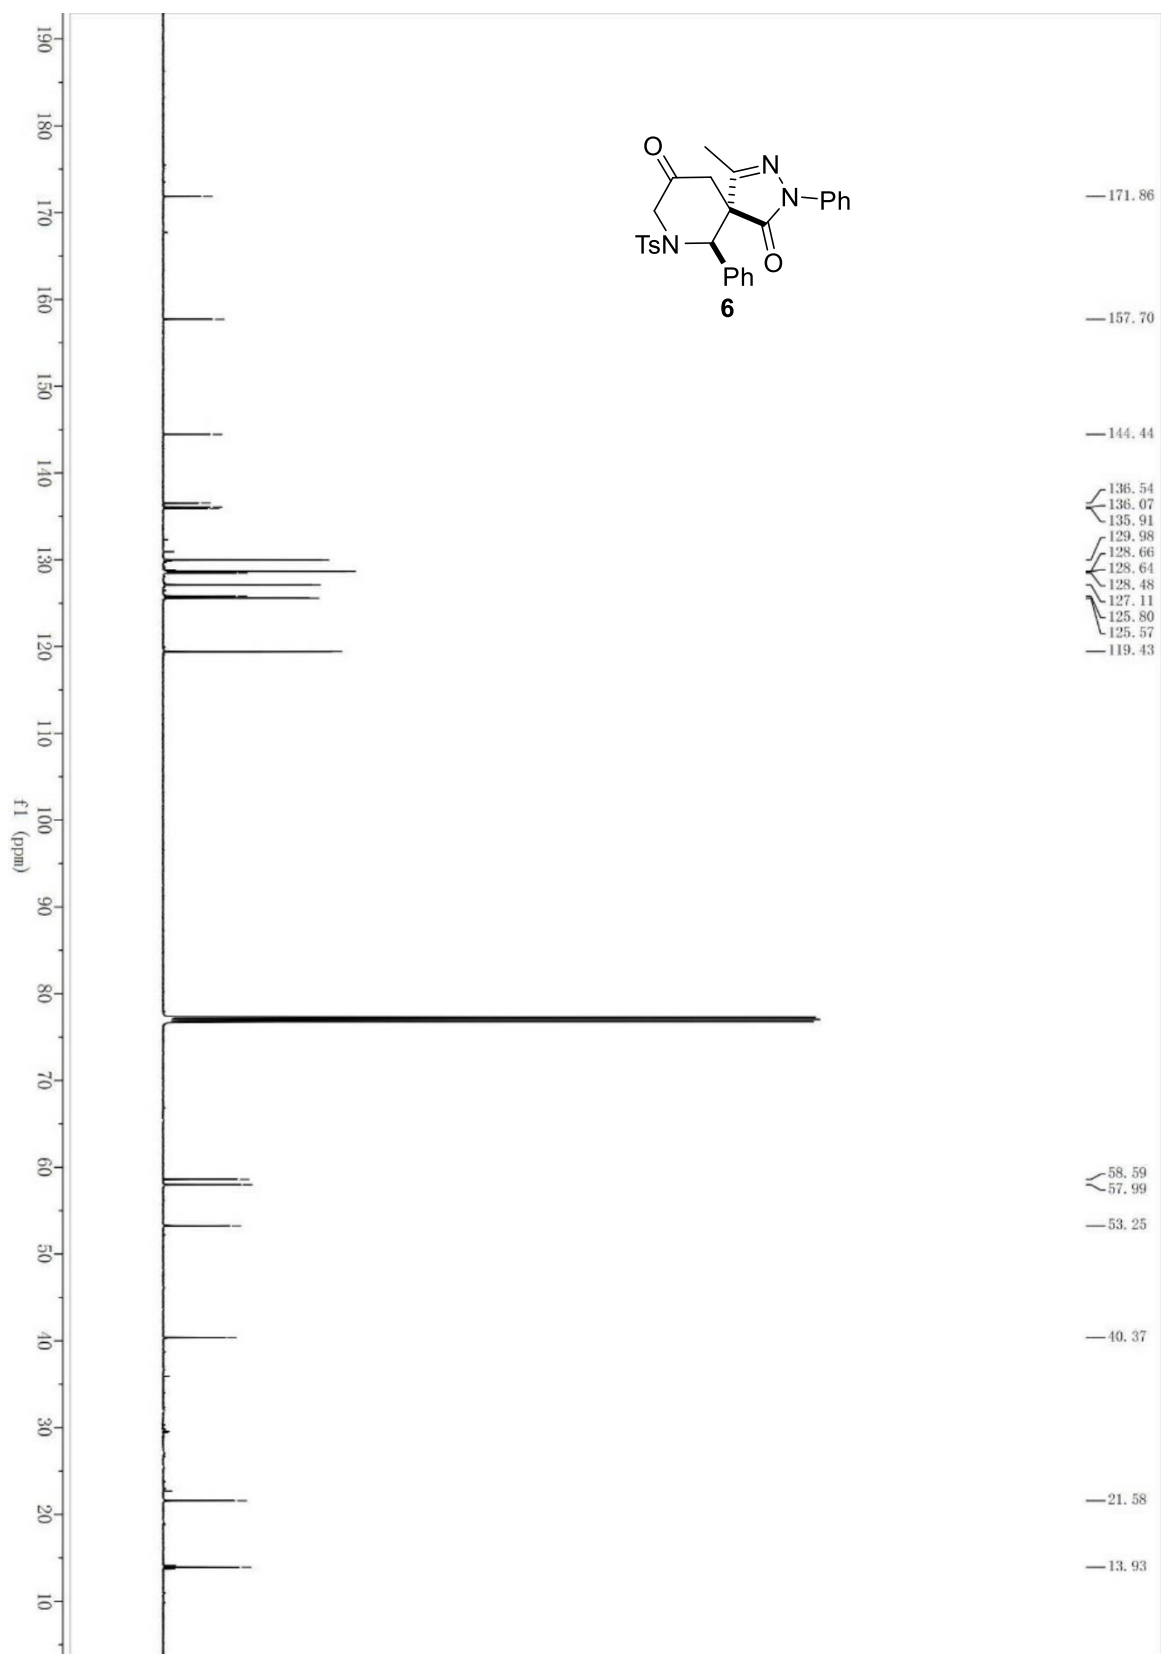

## X-Ray Crystallographic Data of 3aa and 4

Crystallographic data for **3aa** have been deposited with the Cambridge Crystallographic Data Centre as deposition number CCDC 2023840. These data can be obtained free of charge via [www.ccdc.cam.ac.uk/data\\_request/cif](http://www.ccdc.cam.ac.uk/data_request/cif), or by emailing [data\\_request@ccdc.cam.ac.uk](mailto:data_request@ccdc.cam.ac.uk), or by contacting The Cambridge Crystallographic Data Centre, 12, Union Road, Cambridge CB2 1EZ, UK; fax: +44 1223 336033.

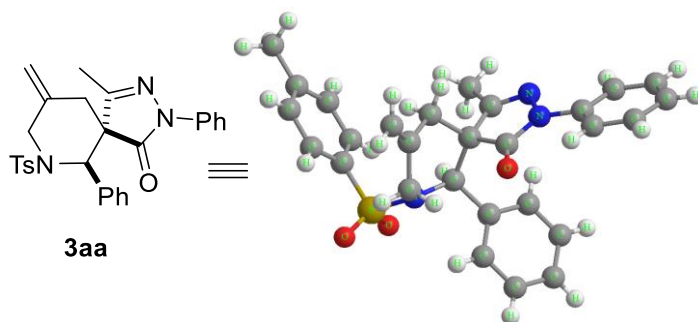

**Table S3. Crystal data and structure refinement for 3aa.**

|                                    |                                                                              |
|------------------------------------|------------------------------------------------------------------------------|
| Identification code                | <b>3aa</b>                                                                   |
| Empirical formula                  | C <sub>62</sub> H <sub>68</sub> N <sub>6</sub> O <sub>6</sub> S <sub>2</sub> |
| Formula weight                     | 1057.34                                                                      |
| Temperature/K                      | 163.15                                                                       |
| Crystal system                     | triclinic                                                                    |
| Space group                        | P-1                                                                          |
| a/Å                                | 9.868(2)                                                                     |
| b/Å                                | 11.707(2)                                                                    |
| c/Å                                | 12.318(3)                                                                    |
| α/°                                | 80.18(3)                                                                     |
| β/°                                | 82.46(3)                                                                     |
| γ/°                                | 76.91(3)                                                                     |
| Volume/Å <sup>3</sup>              | 1359.4(5)                                                                    |
| Z                                  | 1                                                                            |
| ρ <sub>calc</sub> /cm <sup>3</sup> | 1.292                                                                        |
| μ/mm <sup>-1</sup>                 | 0.157                                                                        |
| F(000)                             | 562.0                                                                        |
| Crystal size/mm <sup>3</sup>       | 0.24 × 0.21 × 0.2                                                            |

|                                                  |                                                                    |
|--------------------------------------------------|--------------------------------------------------------------------|
| Radiation                                        | MoK $\alpha$ ( $\lambda$ = 0.71073)                                |
| 2 $\Theta$ range for data collection/ $^{\circ}$ | 4.258 to 54.982                                                    |
| Index ranges                                     | $-12 \leq h \leq 12$ , $-14 \leq k \leq 15$ , $-15 \leq l \leq 15$ |
| Reflections collected                            | 14219                                                              |
| Independent reflections                          | 6130 [ $R_{\text{int}}$ = 0.0381, $R_{\text{sigma}}$ = 0.0445]     |
| Data/restraints/parameters                       | 6130/0/346                                                         |
| Goodness-of-fit on $F^2$                         | 1.095                                                              |
| Final R indexes [ $I \geq 2\sigma(I)$ ]          | $R_1$ = 0.0696, $wR_2$ = 0.1819                                    |
| Final R indexes [all data]                       | $R_1$ = 0.0760, $wR_2$ = 0.1877                                    |
| Largest diff. peak/hole / e $\text{\AA}^{-3}$    | 0.97/-0.49                                                         |

Crystallographic data for **4** have been deposited with the Cambridge Crystallographic Data Centre as deposition number CCDC 2023841. These data can be obtained free of charge via [www.ccdc.cam.ac.uk/data\\_request/cif](http://www.ccdc.cam.ac.uk/data_request/cif), or by emailing [data\\_request@ccdc.cam.ac.uk](mailto:data_request@ccdc.cam.ac.uk), or by contacting The Cambridge Crystallographic Data Centre, 12, Union Road, Cambridge CB2 1EZ, UK; fax: +44 1223 336033.

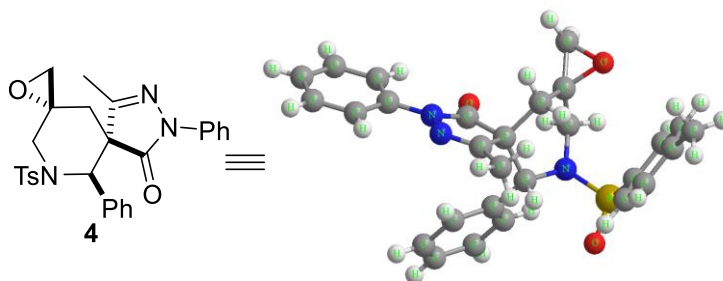

**Table S4. Crystal data and structure refinement for 4.**

|                     |                                                                 |
|---------------------|-----------------------------------------------------------------|
| Identification code | <b>4</b>                                                        |
| Empirical formula   | C <sub>31</sub> H <sub>34</sub> N <sub>3</sub> O <sub>4</sub> S |
| Formula weight      | 544.67                                                          |
| Temperature/K       | 163.15                                                          |
| Crystal system      | triclinic                                                       |
| Space group         | P-1                                                             |

|                                                |                                                               |
|------------------------------------------------|---------------------------------------------------------------|
| $a/\text{\AA}$                                 | 9.928(2)                                                      |
| $b/\text{\AA}$                                 | 11.674(2)                                                     |
| $c/\text{\AA}$                                 | 12.353(3)                                                     |
| $\alpha/^\circ$                                | 81.04(3)                                                      |
| $\beta/^\circ$                                 | 82.19(3)                                                      |
| $\gamma/^\circ$                                | 78.40(3)                                                      |
| Volume/ $\text{\AA}^3$                         | 1377.3(5)                                                     |
| Z                                              | 2                                                             |
| $\rho_{\text{calc}}/\text{g/cm}^3$             | 1.313                                                         |
| $\mu/\text{mm}^{-1}$                           | 0.160                                                         |
| F(000)                                         | 578.0                                                         |
| Crystal size/ $\text{mm}^3$                    | $0.23 \times 0.12 \times 0.09$                                |
| Radiation                                      | MoK $\alpha$ ( $\lambda = 0.71073$ )                          |
| 2 $\Theta$ range for data collection/ $^\circ$ | 5.234 to 54.948                                               |
| Index ranges                                   | $-12 \leq h \leq 12, -15 \leq k \leq 15, -16 \leq l \leq 16$  |
| Reflections collected                          | 16681                                                         |
| Independent reflections                        | 6250 [ $R_{\text{int}} = 0.0341, R_{\text{sigma}} = 0.0352$ ] |
| Data/restraints/parameters                     | 6250/0/355                                                    |
| Goodness-of-fit on $F^2$                       | 1.115                                                         |
| Final R indexes [ $I \geq 2\sigma(I)$ ]        | $R_1 = 0.0575, wR_2 = 0.1410$                                 |
| Final R indexes [all data]                     | $R_1 = 0.0635, wR_2 = 0.1452$                                 |
| Largest diff. peak/hole / $e \text{\AA}^{-3}$  | 0.57/-0.34                                                    |
